# Supplementary material for: Iridium catalysts with modular axial-unfixed biphenyl phosphine–oxazoline ligands: asymmetric hydrogenation of α,β-unsaturated carboxylic acids
Source: Royal Society of Chemistry journal article supplement (doi:10.1039/c6qo00677a), 2017-01-01
Supplement: c6qo00677a1.pdf [file c6qo00677a1.pdf]

## ***Supporting Information***

# Iridium Catalysts with Modular Axial-Unfixed Biphenyl Phosphine- Oxazoline Ligands: Asymmetric Hydrogenation of $\alpha,\beta$ -Unsaturated Carboxylic Acids

QianWang,<sup>†‡</sup> Zongpeng Zhang,<sup>†‡</sup> Caiyou Chen,<sup>‡</sup> Hailong Yang,<sup>‡</sup> Zhengyu Han,<sup>‡</sup>  
Xiu-Qin Dong,<sup>\*‡</sup> and Xumu Zhang<sup>\*§‡</sup>

<sup>†</sup> Qian Wang and Zongpeng Zhang contributed equally to this work.

<sup>‡</sup> College of Chemistry and Molecular Sciences, Wuhan University, Wuhan, Hubei, 430072, P. R. China

<sup>§</sup> Department of Chemistry, South University of Science and Technology of China, Shenzhen, Guangdong, 518055,  
P. R. China.

E-mail address: xumu@whu.edu.cn; xiuqindong@whu.edu.cn.

## **Contents**

|                                                          |    |
|----------------------------------------------------------|----|
| I. General Remarks .....                                 | 2  |
| II. General procedure for synthesis ligands .....        | 2  |
| III. General procedure for asymmetric hydrogenation..... | 7  |
| IV. NMR Spectra .....                                    | 15 |
| V. GC and HPLC spectra.....                              | 48 |
| VI. Reference .....                                      | 84 |

## I. General Remarks

All reactions and manipulations which are sensitive to moisture or air were performed in an argon-filled glove box or using standard Schlenk techniques. Hydrogen gas (99.999%) was purchased from Shanghai Regulator Factory Co., Ltd.  $\alpha$ -alkyl cinnamic acid derivatives were synthesized according to the literature.<sup>1-2</sup> Anhydrous THF, 1,4-dioxane and toluene was distilled from sodium benzophenone ketyl. Anhydrous *i*-PrOH, EA, CH<sub>2</sub>Cl<sub>2</sub> were freshly distilled from calcium hydride. Anhydrous MeOH and EtOH were freshly distilled from Mg. Anhydrous CF<sub>3</sub>CH<sub>2</sub>OH were purchased from Sigma-Aldrich. Solvents were transferred by syringe. [Ir(COD)Cl]<sub>2</sub> was prepared according to the literature.<sup>3-4</sup> The synthesis of Ir complexes **6a-6d** were based on the article.<sup>5</sup> <sup>1</sup>H, <sup>13</sup>C and <sup>31</sup>P NMR spectra were recorded with a Bruker ADVANCE III (400 MHz, 500 MHz) spectrometer with CDCl<sub>3</sub> as the solvent and tetramethylsilane (TMS) as the internal standard. Chemical shifts are reported in parts per million (ppm,  $\delta$  scale) downfield from TMS at 0.00 ppm and referenced to the CDCl<sub>3</sub> at 7.26 ppm (for <sup>1</sup>H NMR) or 77.3 ppm (for <sup>13</sup>C NMR). Data are reported as: multiplicity (s = singlet, d = doublet, t = triplet, q = quartet, m = multiplet), coupling constant in hertz (Hz) and signal area integration in natural numbers. <sup>13</sup>C NMR and <sup>31</sup>P NMR analyses were run with decoupling. Optical rotations [ $\alpha$ ]<sub>D</sub> were determined using a PERKIN ELMER polarimeter 343 instrument. The absolute configuration was assigned by comparison of the corresponding chiral carboxylic acids (**8a-8c**, **8e-8h**, **8l-8n**, **8p-8r**) with the optical rotation datas that reported in the literature,<sup>6</sup> the absolute configuration of others were assigned by analogy. GC analyses were performed using SHIMADZU Lab Solution instrument. HPLC analyses were performed using Daicel chiral column.

## II. General procedure for synthesis of Ligands.

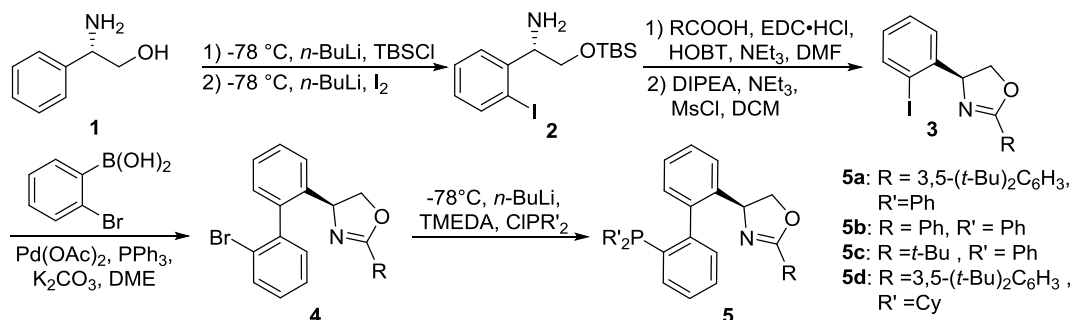

(*S*)-4-(2'-bromo-[1,1'-biphenyl]-2-yl)-2-(3,5-di-tert-butylphenyl)-4,5-dihydrooxazole (**4a**)

2-(tert-Butyl-dimethyl-silanyloxy)-(1*R*)-(2-iodo-phenyl)-ethylamine **2** and various 2-iodophenyl oxazole compounds **3** were prepared according to the procedure of literature.<sup>7</sup> To a solution of (2-bromophenyl)boronic acid (0.11 g, 0.6 mmol), (*S*)-2-(3,5-di-tert-butylphenyl)-4-(2-iodophenyl)-4,5-dihydrooxazole **3a** (0.23 g, 0.5 mmol), PPh<sub>3</sub> (11.1 mg, 0.0425 mmol) and 0.625 mL K<sub>2</sub>CO<sub>3</sub> (2 M in deionized water) in 0.6 mL DME (dimethoxyethane) was added Pd(OAc)<sub>2</sub> (2.25 mg). The resulting mixture was purged with argon and refluxed for overnight. The reaction was cooled to room temperature and diluted with CH<sub>2</sub>Cl<sub>2</sub>/H<sub>2</sub>O (10 mL/10 mL). The phases were separated and the aqueous phase was extracted with CH<sub>2</sub>Cl<sub>2</sub> (2 x 10 mL). The combined organic layers were dried over Na<sub>2</sub>SO<sub>4</sub>, filtered and concentrated in vacuo. After a flash chromatography on silica-gel column (Ethyl acetate/petroleum ether = 1/100 to 1/50), (*S*)-4-(2'-bromo-[1,1'-biphenyl]-2-yl)-2-(3,5-di-tert-butylphenyl)-4,5-dihydrooxazole (**4a**) was obtained with 75% yield. **4b-4d** were obtained in the procedure with moderate yields as white solid. **4a**: [ $\alpha$ ]<sub>D</sub><sup>25</sup> = -9.9 (c = 1.0, CHCl<sub>3</sub>), <sup>1</sup>H NMR (400 MHz, CDCl<sub>3</sub>)  $\delta$  7.87-7.85 (m, 2H), 7.68-7.66 (m, 1H), 7.58-7.26 (m, 6H), 7.26-7.24 (m, 1H), 7.17-7.15 (m, 1H), 5.26-5.18 (m, 1H), 4.54-4.49 (m, 0.7H), 4.27 (t, *J* = 8.8 Hz, 1H), 3.99-3.95 (m, 0.3H), 1.36 (s, 9H), 1.35 (s, 9H). <sup>13</sup>C NMR (101 MHz, CDCl<sub>3</sub>)  $\delta$  165.9, 151.22, 151.19, 141.84, 141.79, 141.3, 140.97, 140.01, 139.8, 133.2, 132.8, 131.7, 131.6, 129.7, 129.50, 129.45, 129.1, 128.9, 127.7, 127.4, 127.3, 127.1, 126.9, 126.6, 126.02, 125.96, 124.2, 124.0, 122.98, 122.94, 75.2, 74.6, 67.9, 67.2, 35.2, 31.7. HRMS (ESI) Calcd for C<sub>29</sub>H<sub>33</sub>ON<sup>81</sup>Br = 492.17196, Found: 492.17111.

**(*S*)-4-(2'-bromo-[1,1'-biphenyl]-2-yl)-2-phenyl-4,5-dihydrooxazole (4b)**

This compound was produced by the same method used for **4a** as white oil, 70% yield, [ $\alpha$ ]<sub>D</sub><sup>25</sup> = -18.0 (c = 1.0, CHCl<sub>3</sub>). <sup>1</sup>H NMR (400 MHz, CDCl<sub>3</sub>)  $\delta$  8.03-7.99 (m, 2H), 7.68-7.65 (m, 1H), 7.54-7.13 (m, 11H), 5.28-5.18 (m, 1H), 4.57-4.52 (m, 0.6H), 4.30-4.26 (m, 1H), 4.00-3.95 (m, 0.4H). <sup>13</sup>C NMR (101 MHz, CDCl<sub>3</sub>)  $\delta$  165.2, 165.1, 141.8, 141.7, 141.1, 140.8, 140.1, 139.8, 133.1, 132.7, 131.7, 131.6, 129.71, 129.66, 129.52, 129.46, 129.2, 129.0, 128.9, 128.67, 128.64, 128.60, 128.58, 127.81, 127.78, 127.75, 127.43, 127.39, 127.37, 127.0, 126.8, 126.5, 124.2, 124.0, 75.4, 75.1, 74.8, 70.4, 67.8, 67.1.

**(*S*)-4-(2'-bromo-[1,1'-biphenyl]-2-yl)-2-(tert-butyl)-4,5-dihydrooxazole (4c)**

This compound was produced by the same method used for **4a** as a white oil, 72% yield,  $[\alpha]_D^{25} = 5.1$  ( $c = 1.0$ ,  $\text{CHCl}_3$ ).  $^1\text{H NMR}$  (400 MHz,  $\text{CDCl}_3$ )  $\delta$  7.67-7.63 (m, 1H), 7.45-7.27 (m, 5H), 7.26-7.10 (m, 2H), 5.06-4.95 (m, 1H), 4.35-4.30 (m, 0.7H), 4.09-4.03 (m, 1H), 3.77-3.73 (m, 0.3H), 1.28 (s, 9H).  $^{13}\text{C NMR}$  (101 MHz,  $\text{CDCl}_3$ )  $\delta$  175.8, 175.6, 141.9, 141.8, 141.5, 141.2, 139.9, 139.7, 133.1, 132.7, 131.7, 131.6, 129.6, 129.43, 129.39, 129.1, 128.8, 127.7, 127.3, 127.22, 127.17, 126.3, 125.9, 124.2, 123.9, 75.4, 74.8, 67.0, 66.4, 33.7, 33.6, 28.2.

**(S)-4-(2'-benzhydryl-[1,1'-biphenyl]-2-yl)-2-(3,5-di-tert-butylphenyl)-4,5-dihydrooxazole (5a)**

To a suspension of (S)-4-(2'-bromo-[1,1'-biphenyl]-2-yl)-2-(3,5-di-tert-butylphenyl)-4,5-dihydrooxazole (**4a**) (98 mg, 0.2 mmol) and Tetramethylethylenediamine (34.8 mg, 0.3 mmol) in 1.5mL  $\text{Et}_2\text{O}$  at  $-78^\circ\text{C}$  was added *n*-BuLi (2 M solution in hexane, 0.2ml) dropwise. The resulting deep blue solution was stirred at  $-78^\circ\text{C}$  for 1.5 hour before  $\text{ClPPh}_2$  (88 mg, 0.4 mmol) was added at the same temperature. The reaction mixture was allowed to warm to rt naturally and stirred overnight. After removing the solvent under reduced pressure, the product **5a** was isolated by flash column chromatography (hexane:EtOAc = 100:1) as a white solid (71.8 mg, 60%). **5a**:  $[\alpha]_D^{25} = -37.0$  ( $c = 1.0$ ,  $\text{CHCl}_3$ ).  $^1\text{H NMR}$  (400 MHz,  $\text{CDCl}_3$ )  $\delta$  7.90-7.85 (m, 2H), 7.57-7.56 (m, 1H), 7.46-7.26 (m, 11H), 7.25-7.15 (m, 6H), 6.74-6.69 (m, 1H), 5.46-5.41 (m, 0.3H), 5.30-5.25 (m, 0.7H), 4.33-4.23 (m, 1.7H), 4.04-4.00 (m, 0.3H), 1.37 (s, 9H), 1.35 (s, 9H).  $^{13}\text{C NMR}$  (101 MHz,  $\text{CDCl}_3$ )  $\delta$  165.7, 151.2, 146.6, 140.9, 137.4, 137.1, 134.4, 134.3, 134.2, 134.1, 133.9, 130.9, 130.8, 129.2, 129.0, 128.83, 128.79, 128.7, 128.64, 128.57, 128.5, 128.3, 128.0, 127.3, 126.6, 126.5, 125.9, 123.03, 122.95, 67.1, 35.2, 31.7.  $^{31}\text{P NMR}$  (162 MHz,  $\text{CDCl}_3$ )  $\delta$  -14.1, -14.9. HRMS (ESI) Calcd for  $\text{C}_{41}\text{H}_{43}\text{ONP}$  = 596.30768, Found: 596.30634.

**(S)-4-(2'-(diphenylphosphanyl)-[1,1'-biphenyl]-2-yl)-2-phenyl-4,5-dihydrooxazole (5b)**

White solid, 65% yield,  $[\alpha]_D^{25} = -40.7$  ( $c = 1.0$ ,  $\text{CHCl}_3$ ).  $^1\text{H NMR}$  (400 MHz,  $\text{CDCl}_3$ )  $\delta$  8.04-7.98 (m, 2H), 7.50-7.29 (m, 14H), 7.19-7.11 (m, 6H), 6.80-6.70 (m, 1H), 5.43-5.40 (m, 0.3H), 5.29-5.23 (m, 0.7H), 4.32-4.23 (m, 1.7H), 4.05-4.01 (m, 0.3H).  $^{13}\text{C NMR}$  (101 MHz,  $\text{CDCl}_3$ )  $\delta$  164.9, 146.8, 146.5, 140.8, 140.7, 140.0, 139.9, 137.4, 137.3, 137.2, 137.0, 136.0, 134.5, 134.4, 134.3, 134.2, 134.12, 134.06, 133.92, 133.87, 131.7, 131.6, 130.9, 130.8, 129.2, 129.0, 128.9, 128.8, 128.73, 128.66, 128.59, 128.57, 128.5, 128.4, 128.1, 128.0, 127.9, 126.6, 126.5, 126.2, 100.2, 75.2,



75.1, 75.0, 68.3, 67.1.  $^{31}\text{P}$  NMR (162 MHz,  $\text{CDCl}_3$ )  $\delta$  -13.9, -14.8. HRMS (ESI) Calcd for  $\text{C}_{33}\text{H}_{27}\text{ONP}$  = 484.18248, Found: 484.18137.

**(S)-2-(tert-butyl)-4-(2'-(diphenylphosphanyl)-[1,1'-biphenyl]-2-yl)-4,5-dihydrooxazole (5c)**

White solid, 60% yield,  $[\alpha]_{\text{D}}^{25} = -7.4$  ( $c = 1.0$ ,  $\text{CHCl}_3$ ).  $^1\text{H}$  NMR (400 MHz,  $\text{CDCl}_3$ )  $\delta$  7.43-7.20 (m, 11H), 7.20-7.03 (m, 5H), 7.00-6.90 (m, 1H), 6.65-6.60 (m, 1H), 5.22-5.07 (m, 1H), 4.16-4.07 (m, 1.8H), 3.83-3.79 (m, 0.2H), 1.29-1.28 (m, 9H).  $^{13}\text{C}$  NMR (101 MHz,  $\text{CDCl}_3$ )  $\delta$  175.4, 146.9, 146.5, 141.2, 141.0, 139.8, 139.7, 137.6, 137.5, 137.1, 137.0, 136.9, 134.4, 134.3, 134.2, 134.1, 134.0, 133.9, 133.8, 130.8, 130.8, 130.7, 130.6, 129.1, 129.0, 128.8, 128.75, 128.7, 128.66, 128.6, 128.5, 128.42, 128.35, 128.3, 128.0, 127.94, 126.3, 126.0, 125.7, 75.2, 75.1, 75.0, 67.5, 66.4, 33.7, 33.6, 28.3.  $^{31}\text{P}$  NMR (162 MHz,  $\text{CDCl}_3$ )  $\delta$  -14.2, -14.9. HRMS (ESI) Calcd for  $\text{C}_{31}\text{H}_{31}\text{ONP}$  = 464.21378, Found: 464.21285.

**(S)-2-(3,5-di-tert-butylphenyl)-4-(2'-(dicyclohexylphosphanyl)-[1,1'-biphenyl]-2-yl)-4,5-dihydrooxazole (5d)**

White solid, 64% yield,  $[\alpha]_{\text{D}}^{25} = -21.3$  ( $c = 1.0$ ,  $\text{CHCl}_3$ ).  $^1\text{H}$  NMR (400 MHz,  $\text{CDCl}_3$ )  $\delta$  7.92-7.87 (m, 2H), 7.66-7.30 (m, 7H), 7.28-7.09 (m, 2H), 5.37-5.19 (m, 1H), 4.61-4.43 (m, 1H), 4.18-3.93 (m, 1H), 1.75-1.65 (m, 10H), 1.38 (s, 9H), 1.37 (m, 9H), 1.26-0.86 (m, 12H).  $^{13}\text{C}$  NMR (101 MHz,  $\text{CDCl}_3$ )  $\delta$  165.4, 165.0, 151.1, 148.5, 141.2, 135.2, 135.0, 133.1, 133.0, 132.8, 131.8, 130.7, 129.3, 129.24, 129.17, 128.7, 128.6, 128.4, 128.1, 127.5, 127.3, 127.1, 126.9, 126.4, 126.3, 126.2, 125.9, 125.7, 123.01, 122.97, 68.3, 68.2, 66.9, 35.9, 35.7, 35.6, 35.4, 35.2, 33.8, 33.7, 33.3, 33.2, 31.7, 30.4, 29.8, 27.9, 27.8, 27.5, 26.8, 26.7.  $^{31}\text{P}$  NMR (162 MHz,  $\text{CDCl}_3$ )  $\delta$  -12.2, -12.9. HRMS (ESI) Calcd for  $\text{C}_{41}\text{H}_{55}\text{ONP}$  = 608.40158, Found: 608.40021.

**Synthesis of  $[\text{Ir}(\text{L})\text{COD}]\text{BArF}$  complex 6a-6d**

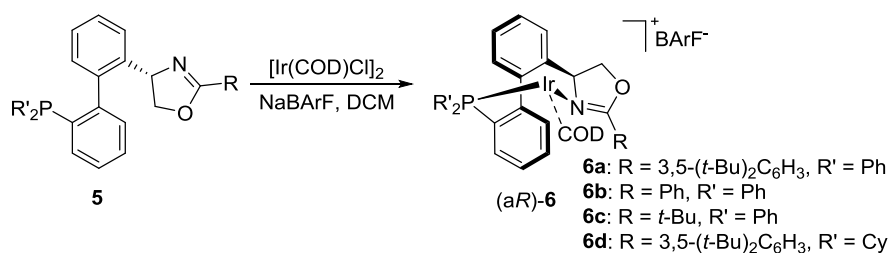

Under N<sub>2</sub> atmosphere, ligand **5a** (110.8 mg, 0.186 mmol) and [Ir(COD)Cl]<sub>2</sub> (62.5 mg, 0.093 mmol) were dissolved in CH<sub>2</sub>Cl<sub>2</sub>. After stirring at rt for 1h, when TLC indicated that ligand was consumed completely, NaBARF (247.3 mg, 0.279 mmol) and H<sub>2</sub>O (1.0 mL) were added successively. After vigorously stirring at the same temperature for 30 minutes, the mixture was diluted with DCM (30 mL) and washed with brine. The organic layer was dried with anhydrous Na<sub>2</sub>SO<sub>4</sub> and concentrated in vacuo to afford the crude product. After chromatography on silica-gel column (hexane: CH<sub>2</sub>Cl<sub>2</sub> = 1:1), the corresponding Ir complex **6a-6d** were obtained.

#### **[Ir(L)COD]BARF complex 6a**

Orange solid, 50% yield,  $[\alpha]_D^{25} = -104.1$  (c = 1.0, CHCl<sub>3</sub>). <sup>1</sup>H NMR (500 MHz, CDCl<sub>3</sub>) δ 7.90 (s, 1H), 7.72 (s, 7H), 7.59-7.57 (m, 1H), 7.52 (s, 6H), 7.45-7.00 (m, 12H), 6.79 (s, 1H), 6.44-6.40 (m, 2H), 5.75-5.74 (m, 1H), 5.61 (s, 1H), 5.43-5.41 (m, 1H), 4.79-4.75 (m, 1H), 4.55 (s, 1H), 4.45-4.42 (m, 1H), 3.25 (s, 1H), 2.96 (s, 1H), 2.45 (s, 1H), 2.23-2.21 (m, 2H), 2.17-2.07 (m, 1H), 1.98 (s, 1H), 1.71-1.57 (m, 6H), 1.39 (s, 18H). <sup>13</sup>C NMR (126 MHz, CDCl<sub>3</sub>) δ 172.0, 162.6, 162.2, 161.8, 161.4, 152.4, 143.6, 143.5, 139.6, 136.1, 136.0, 135.1, 135.0, 134.5, 133.6, 133.5, 132.6, 132.5, 131.8, 131.7, 131.6, 131.5, 131.4, 130.4, 130.2, 130.0, 129.5, 129.3, 129.2, 129.1, 128.8, 128.7, 128.6, 128.1, 127.5, 127.1, 125.9, 124.6, 123.8, 123.6, 121.6, 117.7, 91.4, 91.3, 83.1, 83.0, 75.2, 73.6, 73.1, 61.8, 35.4, 33.3, 31.6, 31.5, 30.4, 29.6, 28.6. <sup>31</sup>P NMR (202 MHz, CDCl<sub>3</sub>) δ 20.0. HRMS (ESI) Calcd for C<sub>49</sub>H<sub>54</sub>ONIrP [M-BARF]<sup>+</sup> = 896.35668, Found: 896.35588.

#### **[Ir(L)COD]BARF complex 6b**

Orange solid, 45% yield,  $[\alpha]_D^{25} = -62.1$  (c = 1.0, CHCl<sub>3</sub>). <sup>1</sup>H NMR (400 MHz, CDCl<sub>3</sub>) δ 8.40-8.25 (m, 2H), 7.81 (t, *J* = 7.5 Hz, 1H), 7.72 (s, 7H), 7.60-7.45 (m, 6H), 7.44-7.33 (m, 2H), 7.31-7.28 (m, 2H), 7.26 (s, 1H), 7.25-7.17 (m, 6H), 7.14-7.10 (m, 1H), 7.04-7.00 (m, 1H), 6.69-6.62 (m, 3H), 5.75 (d, *J* = 7.3 Hz, 1H), 5.57-5.45 (m, 1H), 5.37-5.35 (m, 1H), 4.85-4.80 (m, 1H), 4.45-4.40 (m, 1H), 4.39-4.22 (m, 1H), 3.25-3.08 (m, 1H), 2.95-2.91 (m, 1H), 2.30 – 2.15 (m, 4H), 1.87-1.82 (m, 3H), 1.77-1.65 (m, 3H). <sup>13</sup>C NMR (101 MHz, CDCl<sub>3</sub>) δ 169.6, 162.2, 161.7, 161.2, 143.2, 139.2, 136.0, 135.9, 135.1, 134.8, 134.1, 133.8, 133.7, 132.0, 131.6, 131.5, 131.3, 130.3, 129.9, 129.4, 129.3, 129.0, 128.9, 128.8, 128.3, 127.8, 126.2, 124.0, 123.5, 120.9, 117.7, 91.5, 91.4, 84.2, 77.6, 75.5, 74.3, 73.3, 60.8, 33.96, 32.0, 30.3, 30.0, 28.1, 27.2, 23.0, 14.4. <sup>31</sup>P NMR (162 MHz, CDCl<sub>3</sub>)

$\delta$  17.7. HRMS (ESI) Calcd for  $C_{41}H_{38}ONIrP [M-BArF]^+$  = 784.23257, Found: 784.23046.

#### **[Ir(L)COD]BArF complex 6c**

Orange solid, 47% yield,  $[\alpha]_D^{25} = -13.9$  ( $c = 1.0$ ,  $CHCl_3$ ).  $^1H$  NMR (500 MHz,  $CDCl_3$ )  $\delta$  7.74 (s, 7H), 7.68 – 7.59 (m, 1H), 7.60 – 7.38 (m, 9H), 7.36 – 7.06 (m, 9H), 6.62 (d,  $J = 6.6$  Hz, 1H), 5.85 (d,  $J = 7.4$  Hz, 1H), 5.32 (s, 1H), 5.14 (t,  $J = 11.3$  Hz, 1H), 4.66 (t,  $J = 10.1$  Hz, 1H), 4.08 (t,  $J = 10.0$  Hz, 2H), 3.05-2.97 (m, 2H), 2.30-2.20 (m, 2H), 2.07-2.04 (m, 2H), 1.86-1.77 (m, 2H), 1.67-1.46 (m, 6H), 1.34 (s, 9H).  $^{13}C$  NMR (126 MHz,  $CDCl_3$ )  $\delta$  180.4, 162.6, 162.2, 161.8, 138.6, 135.7, 135.6, 135.1, 134.9, 134.1, 134.0, 133.3, 132.2, 131.8, 131.6, 131.4, 130.9, 130.5, 130.1, 129.9, 129.4, 129.3, 129.0, 128.7, 128.5, 126.9, 126.5, 125.9, 123.8, 121.6, 117.7, 92.2, 83.8, 75.2, 74.2, 71.9, 59.9, 34.6, 32.9, 32.2, 30.7, 30.0, 28.7, 28.0.  $^{31}P$  NMR (202 MHz,  $CDCl_3$ )  $\delta$  17.2. HRMS (ESI) Calcd for  $C_{39}H_{42}ONIrP [M-BArF]^+$  = 764.26387, Found: 764.26172.

#### **[Ir(L)COD]BArF complex 6d**

Orange solid, 43% yield,  $[\alpha]_D^{25} = -50.9$  ( $c = 1.0$ ,  $CHCl_3$ ).  $^1H$  NMR (500 MHz,  $CDCl_3$ )  $\delta$  7.75-7.70 (m, 8H), 7.62-7.51 (m, 8H), 7.31-7.30 (m, 1H), 7.18-7.14 (m, 2H), 5.60-5.55 (m, 1H), 5.29 (s, 3H), 5.00 (s, 1H), 4.59-4.50 (m, 2H), 4.14-4.05 (m, 4H), 3.97 (s, 1H), 3.63 (s, 1H), 2.36 (brs, 1H), 2.22 (brs, 1H), 2.19-1.89 (m, 2H), 1.64-1.48 (m, 14H), 1.46 – 1.33 (m, 18H), 1.27-0.75 (m, 10H).  $^{13}C$  NMR (126 MHz,  $CDCl_3$ )  $\delta$  172.2, 171.5, 162.6, 162.2, 161.8, 161.4, 152.2, 135.1, 133.1, 133.0, 132.6, 132.3, 131.3, 130.5, 130.0, 129.6, 129.3, 129.0, 128.7, 128.3, 128.2, 128.1, 125.9, 124.5, 123.9, 123.8, 117.7, 86.7, 74.2, 73.1, 66.0, 60.7, 58.9, 53.7, 39.3, 35.4, 33.1, 31.6, 31.5, 31.1, 31.05, 30.0, 29.6, 29.1, 29.0, 28.0, 27.95, 27.9, 27.8, 27.5, 27.1, 26.0, 21.3, 14.5.  $^{31}P$  NMR (202 MHz,  $CDCl_3$ )  $\delta$  15.6. HRMS (ESI) Calcd for  $C_{49}H_{66}ONIrP [M-BArF]^+$  = 908.45167, Found: 908.45001.

### **III. General procedure for asymmetric hydrogenation.**

$\alpha$ -substituted cinnamic acid (0.2 mmol) and Ir-complex **6** (0.2  $\mu$ mol) was dissolved in EtOH (1 mL). This solution was then transferred into an autoclave. The hydrogenation was performed at room temperature under 30 bar of  $H_2$  (or under reaction conditions described in Table 1 and Table 2). After carefully releasing the hydrogen, the reaction mixture was directly passed through a short silica gel column and flashed with EA. And then, the hydrogenation product in MeOH was slowly

added (Trimethylsilyl)diazomethane. Half an hour later, the reaction system was concentrated in vacuo to afford the corresponding methyl ester was directly used for chiral HPLC or GC analysis to measure the enantiomeric excess and for NMR to measure the conversion.

(*R*)-2-methyl-3-phenylpropanoic acid **8a** <sup>6a</sup>

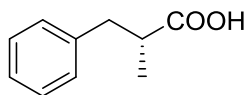

Colorless oil, 98% yield; 97% ee,  $[\alpha]_{\text{D}}^{25} = -12.6$  ( $c = 1$ ,  $\text{CHCl}_3$ ).<sup>6</sup> HPLC condition for corresponding methyl ester: Chiralpak OJ-H column, hexane/isopropanol = 99:1, flow rate = 0.5 mL/min; UV detection at 210 nm;  $t_{\text{R}} = 18.9$  min (major), 21.3 min (minor). <sup>1</sup>H NMR (400 MHz,  $\text{CDCl}_3$ )  $\delta$  7.31-7.27 (m, 2H), 7.23-7.18 (m, 3H), 3.10-3.05 (m, 1H), 2.79-2.73 (m, 1H), 2.69-2.64 (m, 1H), 1.17 (d,  $J = 6.8$  Hz, 3H). <sup>13</sup>C NMR (101 MHz,  $\text{CDCl}_3$ )  $\delta$  182.5, 139.3, 129.3, 128.7, 126.7, 41.5, 39.6, 16.7.

(*R*)-2-methyl-3-(*o*-tolyl)propanoic acid **8b** <sup>6a</sup>

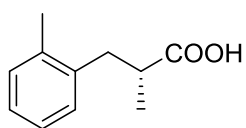

Colorless oil, 96% yield, 94% ee,  $[\alpha]_{\text{D}}^{25} = -11.2$  ( $c = 0.5$ , acetone). HPLC condition for corresponding methyl ester: Chiralpak IB column, hexane/isopropanol = 99:1, flow rate = 0.5 mL/min; UV detection at 205 nm;  $t_{\text{R}} = 9.7$  min (major), 11.4 min (minor). <sup>1</sup>H NMR (400 MHz,  $\text{CDCl}_3$ )  $\delta$  9.81 (brs, 1H), 7.13 (s, 4H), 3.13-3.08 (m, 1H), 2.77-2.72 (m, 1H), 2.67-2.32 (m, 1H), 2.32 (s, 3H), 1.19 (d,  $J = 6.4$  Hz, 3H). <sup>13</sup>C NMR (101 MHz,  $\text{CDCl}_3$ )  $\delta$  183.2, 137.6, 136.6, 130.7, 129.9, 126.8, 126.2, 40.3, 36.8, 19.7, 16.9.

(*R*)-2-methyl-3-(*p*-tolyl)propanoic acid **8c** <sup>6a</sup>

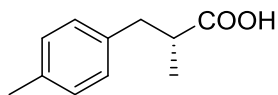

Colorless oil, 96% yield, 95% ee,  $[\alpha]_{\text{D}}^{25} = -4.2$  ( $c = 1.0$ , acetone). HPLC condition for corresponding methyl ester: Chiralpak OJ-H column, hexane/isopropanol = 99:1, flow rate = 0.5 mL/min; UV detection at 210 nm;  $t_{\text{R}} = 17.5$  min (major), 18.2 min (minor). <sup>1</sup>H NMR (400 MHz,  $\text{CDCl}_3$ )  $\delta$  7.17-6.98 (m, 4H), 3.05-3.01 (m, 1H), 2.76-2.69 (m, 1H), 2.68-2.58 (m, 1H), 2.31 (s, 3H), 1.15 (d,  $J = 6.8$  Hz, 3H). <sup>13</sup>C NMR (101 MHz,  $\text{CDCl}_3$ )  $\delta$  182.9, 136.3, 136.1, 129.4, 129.2,

41.7, 39.2, 21.3, 16.7.

(*R*)-3-(3,4-dimethylphenyl)-2-methylpropanoic acid **8d**

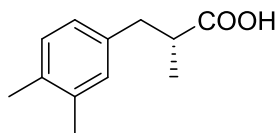

Colorless oil, 95% yield; 94% ee,  $[\alpha]_{\text{D}}^{25} = -6.5$  ( $c = 1.0$ , acetone). HPLC condition for corresponding methyl ester: Chiralpak OD-H column, hexane/isopropanol = 99:1, flow rate = 0.5 mL/min; UV detection at 210 nm;  $t_{\text{R}} = 9.6$  min (minor), 10.2 min (major).  $^1\text{H}$  NMR (400 MHz,  $\text{CDCl}_3$ )  $\delta$  7.05-7.03 (m, 1H), 6.95-6.90 (m, 2H), 3.04-2.99 (m, 1H), 2.75-2.69 (m, 1H), 2.60-2.54 (m, 1H), 2.22 (s, 6H), 1.15 (d,  $J = 6.8$  Hz, 3H).  $^{13}\text{C}$  NMR (101 MHz,  $\text{CDCl}_3$ )  $\delta$  182.7, 136.79, 136.75, 134.8, 130.6, 129.9, 126.6, 39.2, 30.0, 20.0, 19.6, 16.8.

(*R*)-3-(2-methoxyphenyl)-2-methylpropanoic acid **8e** <sup>6a</sup>

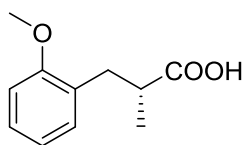

Colorless oil, 97% yield; 95% ee;  $[\alpha]_{\text{D}}^{25} = -20.1$  ( $c = 1.0$ , acetone), HPLC condition for corresponding methyl ester: Chiralpak OD-H column, hexane/isopropanol = 99:1, flow rate = 0.5 mL/min; UV detection at 210 nm;  $t_{\text{R}} = 35.5$  min (minor), 37.3 min (major).  $^1\text{H}$  NMR (400 MHz,  $\text{CDCl}_3$ )  $\delta$  7.22-7.18 (m, 1H), 7.12 (d,  $J = 6.5$  Hz, 1H), 6.89-6.83 (m, 2H), 3.80 (s, 3H), 3.07-3.02 (m, 1H), 2.88-2.81 (m, 1H), 2.72-2.67 (m, 1H), 1.16 (d,  $J = 6.8$  Hz, 3H).  $^{13}\text{C}$  NMR (101 MHz,  $\text{CDCl}_3$ )  $\delta$  183.2, 157.9, 131.2, 128.0, 127.7, 120.5, 110.4, 55.4, 39.6, 34.5, 17.1.

(*R*)-3-(3-methoxyphenyl)-2-methylpropanoic acid **8f** <sup>6a</sup>

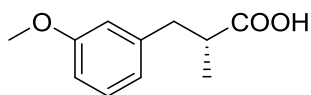

Colorless oil, 96% yield, 94% ee,  $[\alpha]_{\text{D}}^{25} = -5.4$  ( $c = 1.0$ , acetone). HPLC condition for corresponding methyl ester: Chiralpak OJ-H column, hexane/isopropanol = 99:1, flow rate = 0.5 mL/min; UV detection at 210 nm;  $t_{\text{R}} = 21.7$  min (major), 22.8 min (minor).  $^1\text{H}$  NMR (400 MHz,  $\text{CDCl}_3$ )  $\delta$  7.23-7.19 (m, 1H), 6.79-6.74 (m, 3H), 3.79 (s, 3H), 3.08-3.04 (m, 1H), 2.80-2.75 (m, 1H), 2.67-2.62 (m, 1H), 1.18 (d,  $J = 6.8$  Hz, 3H).  $^{13}\text{C}$  NMR (101 MHz,  $\text{CDCl}_3$ )  $\delta$  159.8, 140.9, 129.7, 121.7, 115.0, 112.0, 55.4, 39.6, 16.8.

(*R*)-3-(4-methoxyphenyl)-2-methylpropanoic acid **8g**<sup>6a</sup>

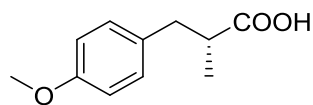

Colorless oil, 95% yield, 96% ee,  $[\alpha]_{\text{D}}^{25} = -4.7$  ( $c = 1.0$ , acetone).

HPLC condition for corresponding methyl ester: Chiralpak OJ-H column, hexane/isopropanol = 99:1, flow rate = 0.5 mL/min; UV detection at 210 nm;  $t_{\text{R}} = 29.9$  min (minor), 31.5 min (major). <sup>1</sup>H NMR (400 MHz, CDCl<sub>3</sub>)  $\delta$  7.10 (d,  $J = 8.4$  Hz, 2H), 6.83 (d,  $J = 8.4$  Hz, 2H), 3.79 (s, 3H), 3.03-2.98 (m, 1H), 2.75-2.68 (m, 1H), 2.65-2.59 (m, 1H), 1.17 (d,  $J = 6.8$  Hz, 3H). <sup>13</sup>C NMR (101 MHz, CDCl<sub>3</sub>)  $\delta$  182.7, 158.4, 131.4, 130.2, 114.0, 55.5, 41.9, 38.8, 16.7.

(*R*)-2-methyl-3-(3,4,5-trimethoxyphenyl)propanoic acid **8h**<sup>6b</sup>

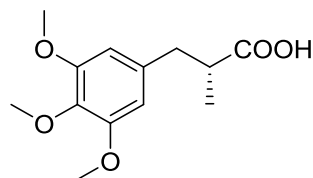

White solid, mp 116–118 °C, 98% yield, 93% ee,  $[\alpha]_{\text{D}}^{25} = -11.8$  ( $c = 1.0$ , acetone).

HPLC condition for corresponding methyl ester: Chiralpak AD-H column, hexane/isopropanol = 99:1, flow rate = 0.5 mL/min; UV detection at 205 nm;  $t_{\text{R}} = 37.2$  min (major), 40.5 min (minor). <sup>1</sup>H NMR (400 MHz, CDCl<sub>3</sub>)  $\delta$  6.40 (s, 2H), 3.84-3.83 (m, 9H), 3.05-3.00 (m, 1H), 2.78-2.73 (m, 1H), 2.62-2.57 (m, 1H), 1.19 (d,  $J = 6.8$  Hz, 3H). <sup>13</sup>C NMR (101 MHz, CDCl<sub>3</sub>)  $\delta$  182.4, 153.3, 136.7, 135.1, 106.1, 61.1, 56.3, 41.7, 40.0, 16.9.

(*R*)-3-(2-fluorophenyl)-2-methylpropanoic acid **8i**

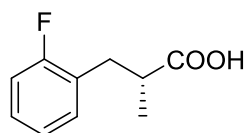

Colorless oil, 94% yield, 94% ee,  $[\alpha]_{\text{D}}^{25} = -20.8$  ( $c = 1.0$ , acetone).

HPLC condition for corresponding methyl ester: Chiralpak AS-H column, hexane/isopropanol = 99:1, flow rate = 0.5 mL/min; UV detection at 210 nm;  $t_{\text{R}} = 9.1$  min (minor), 10.0 min (major). <sup>1</sup>H NMR (400 MHz, CDCl<sub>3</sub>)  $\delta$  7.24-7.18 (m, 2H), 7.08-7.00 (m, 2H), 3.09-3.04 (m, 1H), 2.85-2.74 (m, 2H), 1.20 (d,  $J = 6.4$  Hz, 3H). <sup>13</sup>C NMR (101 MHz, CDCl<sub>3</sub>)  $\delta$  161.6 (d,  $J = 243.8$  Hz), 131.6 (d,  $J = 4.7$  Hz), 128.6 (d,  $J = 8.1$  Hz), 126.2 (d,  $J = 15.6$  Hz), 124.2 (d,  $J = 3.5$  Hz), 115.6 (d,  $J = 21.9$  Hz), 40.1, 32.8, 16.9.

(*R*)-3-(3-fluorophenyl)-2-methylpropanoic acid **8j**

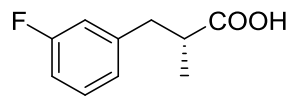

Colorless oil, 97% yield, 93% ee,  $[\alpha]_{\text{D}}^{25} = -5.3$  ( $c = 1.0$ , acetone). HPLC condition for corresponding methyl ester: Chiralpak AS-H column, hexane/isopropanol = 99:1, flow rate = 0.5 mL/min; UV detection at 210 nm;  $t_{\text{R}} = 9.6$  min (minor), 10.8 min (major).  $^1\text{H NMR}$  (400 MHz,  $\text{CDCl}_3$ )  $\delta$  9.94 (brs, 1H), 7.27-7.21 (m, 1H), 7.96-6.88 (m, 3H), 3.08-3.03 (m, 1H), 2.879-2.63 (m, 2H), 1.17 (d,  $J = 6.8$  Hz, 3H).  $^{13}\text{C NMR}$  (101 MHz,  $\text{CDCl}_3$ )  $\delta$  182.6, 163.1 (d,  $J = 244.0$  Hz), 141.8 (d,  $J = 7.3$  Hz), 130.1 (d,  $J = 8.3$  Hz), 124.9 (d,  $J = 2.7$  Hz), 116.1 (d,  $J = 20.9$  Hz), 113.6 (d,  $J = 20.9$  Hz), 41.4, 39.2, 16.8.

(*R*)-3-(4-fluorophenyl)-2-methylpropanoic acid **8k**

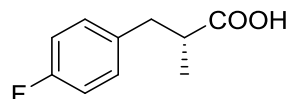

Colorless oil, 96% yield, 94% ee,  $[\alpha]_{\text{D}}^{25} = -11.9$  ( $c = 1.0$ , acetone). HPLC condition for corresponding methyl ester: Chiralpak AS-H column, hexane/isopropanol = 99:1, flow rate = 0.5 mL/min; UV detection at 210 nm;  $t_{\text{R}} = 9.8$  min (minor), 10.8 min (major).  $^1\text{H NMR}$  (400 MHz,  $\text{CDCl}_3$ )  $\delta$  7.16-7.12 (m, 2H), 7.00-6.95 (m, 3H), 3.05-3.00 (m, 1H), 2.76-2.63 (m, 2H), 1.18 (d,  $J = 6.8$  Hz, 3H).  $^{13}\text{C NMR}$  (101 MHz,  $\text{CDCl}_3$ )  $\delta$  181.9, 161.7 (d,  $J = 242.8$  Hz), 134.9, 130.7 (d,  $J = 7.8$  Hz), 115.5 (d,  $J = 21.1$  Hz), 41.6, 38.7, 16.8.

(*R*)-3-(4-chlorophenyl)-2-methylpropanoic acid **8l** <sup>6a</sup>

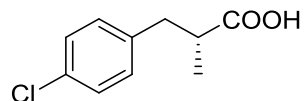

Colorless oil, 96% yield, 90% ee,  $[\alpha]_{\text{D}}^{25} = -18.7$  ( $c = 1.0$ , acetone). HPLC condition for corresponding methyl ester: Chiralpak AS-H column, hexane/isopropanol = 99:1, flow rate = 0.5 mL/min; UV detection at 210 nm;  $t_{\text{R}} = 10.1$  min (minor), 11.7 min (major).  $^1\text{H NMR}$  (400 MHz,  $\text{CDCl}_3$ )  $\delta$  7.26 (d,  $J = 8.4$  Hz, 2H), 7.12 (d,  $J = 8.0$  Hz, 2H), 3.05-3.00 (m, 1H), 2.76-2.63 (m, 2H), 1.18 (d,  $J = 6.8$  Hz, 3H).  $^{13}\text{C NMR}$  (101 MHz,  $\text{CDCl}_3$ )  $\delta$  138.0, 132.4, 130.6, 128.8, 41.8, 39.0, 16.9.

(*R*)-3-(4-bromophenyl)-2-methylpropanoic acid **8m** <sup>6a</sup>

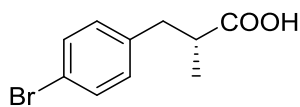

Colorless oil, 95% yield; 90% ee;  $[\alpha]_{\text{D}}^{25} = -10.9$  ( $c = 1.0$ ,  $\text{CHCl}_3$ ). HPLC condition for corresponding methyl ester: Chiralpak OJ-H column, hexane/isopropanol = 99:1, flow rate = 0.5 mL/min; UV detection at 210 nm;  $t_{\text{R}} = 16.9$  min (major), 17.7 min (minor).  $^1\text{H}$  NMR (400 MHz,  $\text{CDCl}_3$ )  $\delta$  7.41 (d,  $J = 8.2$  Hz, 2H), 7.06 (d,  $J = 8.2$  Hz, 2H), 3.03-2.98 (m, 1H), 2.76-2.61 (m, 2H), 1.18 (d,  $J = 6.8$  Hz, 3H).  $^{13}\text{C}$  NMR (101 MHz,  $\text{CDCl}_3$ )  $\delta$  138.3, 131.8, 131.0, 120.6, 41.3, 39.0, 16.9.

(*R*)-3-(furan-2-yl)-2-methylpropanoic acid **8n**<sup>6a</sup>

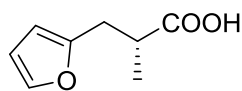

Colorless oil, 94% yield; 90% ee;  $[\alpha]_{\text{D}}^{25} = -4.3$  ( $c = 1.0$ , acetone), HPLC condition for corresponding methyl ester: Chiralpak OD-H column, hexane/ isopropanol = 99:1, flow rate = 0.5 mL/min; UV detection at 210 nm;  $t_{\text{R}} = 9.5$  min (major), 9.9 min (minor).  $^1\text{H}$  NMR (400 MHz,  $\text{CDCl}_3$ )  $\delta$  7.32 (s, 1H), 6.29 (s, 1H), 6.07 (d,  $J = 2.4$  Hz, 1H), 3.10-3.05 (m, 1H), 2.87-2.71 (m, 2H), 1.21 (d,  $J = 6.8$  Hz, 3H).  $^{13}\text{C}$  NMR (126 MHz,  $\text{CDCl}_3$ )  $\delta$  181.5, 153.9, 141.5, 110.4, 106.6, 39.5, 32.0, 17.1.

(*R*)-3-cyclohexyl-2-methylpropanoic acid **8o**

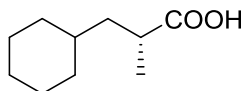

Colorless oil, 93% yield, 88% ee,  $[\alpha]_{\text{D}}^{25} = -11.0$  ( $c = 1.0$ ,  $\text{CHCl}_3$ ). GC (Supelco  $\beta$ -DEX<sup>TM</sup>120,  $df = 0.25$   $\mu\text{m}$ , 0.25 mm i.d.  $\times$  30 m, fused silica capillary column); carrier gas,  $\text{N}_2$  (flow 1.2 mL/min); injection temp, 250  $^\circ\text{C}$ ; initial column temperature, 80  $^\circ\text{C}$ ; progress rate, 0.5  $^\circ\text{C}/\text{min}$ ; final column temperature, 150  $^\circ\text{C}$ ; this temperature is held for 10 min; detector temp, 260  $^\circ\text{C}$ ;  $t_{\text{R}}(\text{R}) = 73.5$  min (major),  $t_{\text{S}}(\text{S}) = 74.9$  min (minor).  $^1\text{H}$  NMR (400 MHz,  $\text{CDCl}_3$ )  $\delta$  3.08-3.02 (m, 1H), 2.52-2.49 (m, 1H), 1.85-1.48 (m, 5H), 1.30-1.15 (m, 5H), 1.13 (d,  $J = 6.9$  Hz, 3H), 0.93-0.79 (m, 2H).  $^{13}\text{C}$  NMR (101 MHz,  $\text{CDCl}_3$ )  $\delta$  183.6, 41.8, 37.5, 35.5, 33.7, 33.3, 26.9, 26.6, 26.5, 17.8.

(*R*)-2-benzylbutanoic acid **8p**<sup>6b</sup>



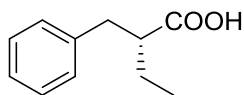

Colorless oil, 96% yield, 97% ee,  $[\alpha]_{\text{D}}^{25} = -11.1$  ( $c = 1.0$ ,  $\text{CHCl}_3$ ). HPLC condition for corresponding methyl ester: Chiralpak OJ-H column, hexane/isopropanol = 99:1, flow rate = 0.5 mL/min; UV detection at 210 nm;  $t_{\text{R}} = 17.1$  min (major), 19.8 min (minor),  $^1\text{H NMR}$  (400 MHz,  $\text{CDCl}_3$ )  $\delta$  7.29-7.25 (m, 2H), 7.23-7.17 (m, 3H), 3.01-2.95 (m, 1H), 2.78-2.73 (m, 1H), 2.65-2.58 (m, 1H), 1.64-1.59 (m, 2H), 0.96 (t,  $J = 7.2$  Hz, 3H).  $^{13}\text{C NMR}$  (101 MHz,  $\text{CDCl}_3$ )  $\delta$  181.8, 139.4, 129.2, 128.7, 126.7, 49.1, 38.0, 25.0, 11.9.

(*S*)-2-benzyl-3-methylbutanoic acid **8q** <sup>6a</sup>

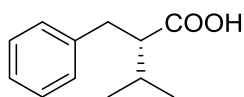

Colorless oil, 96% yield, 95% ee,  $[\alpha]_{\text{D}}^{25} = -14.2$  ( $c = 1.0$ , acetone). HPLC condition for corresponding methyl ester: Chiralpak OJ-H column, hexane/isopropanol = 99:1, flow rate = 0.5 mL/min; UV detection at 210 nm;  $t_{\text{R}} = 13.1$  min (major), 15.2 min (minor),  $^1\text{H NMR}$  (400 MHz,  $\text{CDCl}_3$ )  $\delta$  7.31-7.27 (m, 2H), 7.24-7.20 (t,  $J = 8.6$  Hz, 3H), 2.90-2.88 (m, 2H), 2.55-2.50 (m, 1H), 2.04-1.95 (m, 1H), 1.08-1.04 (m, 6H).  $^{13}\text{C NMR}$  (101 MHz,  $\text{CDCl}_3$ )  $\delta$  139.9, 129.1, 128.7, 126.5, 54.6, 35.6, 30.7, 20.6, 20.3.

(*S*)-2,3-diphenylpropanoic acid **8r** <sup>6a</sup>

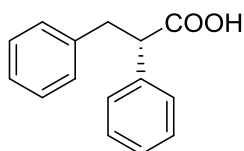

White solid, 95% yield, mp 79–81 °C, 94% ee,  $[\alpha]_{\text{D}}^{25} = 49.8$  ( $c = 0.5$ , acetone). HPLC condition for corresponding methyl ester: Chiralpak OD-H column, hexane/isopropanol = 99:1, flow rate = 0.5 mL/min; UV detection at 210 nm;  $t_{\text{R}} = 12.9$  min (minor), 14.2 min (major),  $^1\text{H NMR}$  (400 MHz,  $\text{CDCl}_3$ )  $\delta$  7.24-7.03 (m, 10H), 3.78 (t,  $J = 7.3$ , 1H), 3.33 (m, 1H), 2.97 (m, 1H).  $^{13}\text{C NMR}$  (101 MHz,  $\text{CDCl}_3$ )  $\delta$  179.7, 139.1, 138.5, 129.2, 128.9, 128.7, 128.4, 127.7, 126.6, 77.6, 77.3, 77.0, 54.0, 39.6.

In addition, we applied our catalytic system to promote the asymmetric hydrogenation of two other types of unsaturated acids such as  $\alpha$ -phenyl substituted acrylic acid and the unsaturated cyclic acid with tetra-substituted olefin. For  $\alpha$ -phenyl substituted acrylic acid substrate, we can obtain the

hydrogenation product with moderate result (85% ee, 88% conversion). For unsaturated cyclic acid with *tetra*-substituted olefin substrate, no product was observed in this transformation, it was mainly owing to the substrate with bulky steric hindrance.

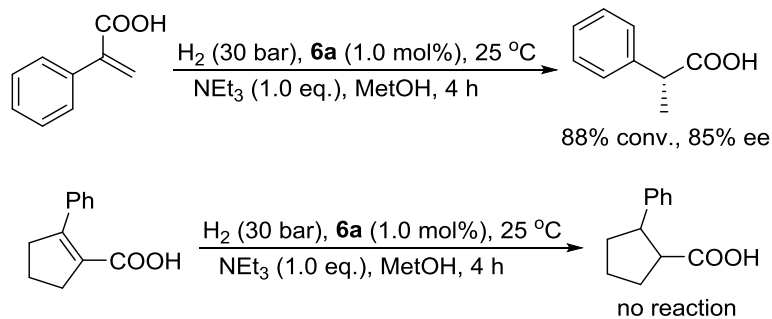

#### IV. NMR Spectra

(S)-4-(2'-bromo-[1,1'-biphenyl]-2-yl)-2-(3,5-di-tert-butylphenyl)-4,5-dihydrooxazole (**4a**)

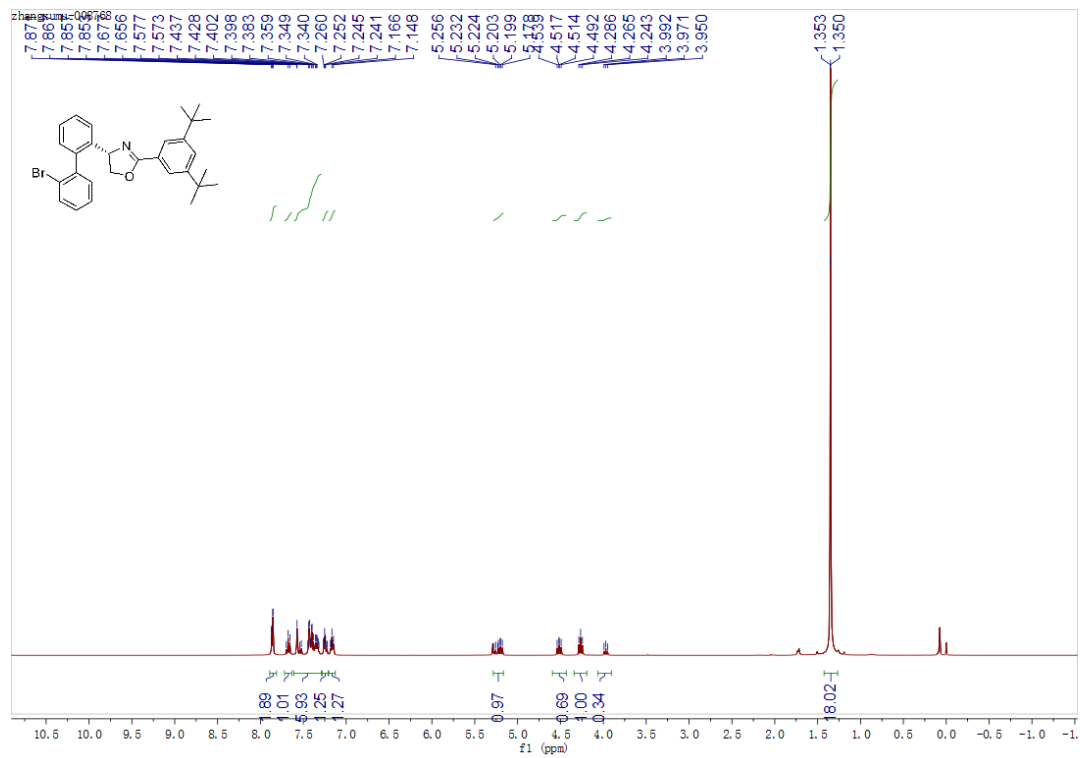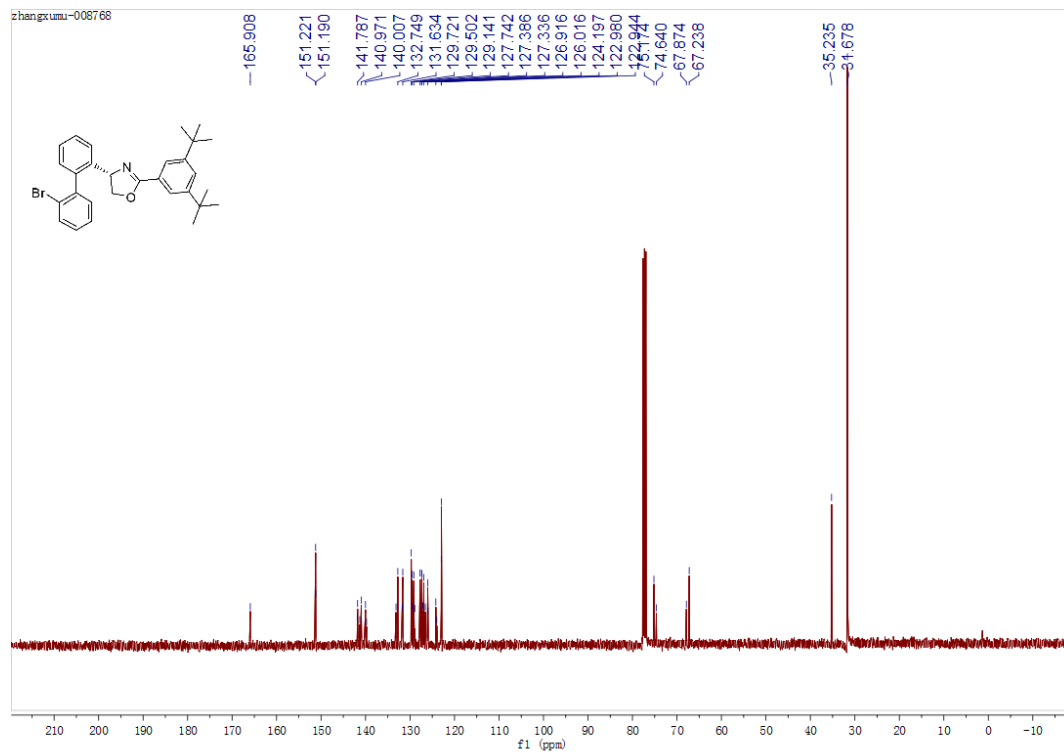

(S)-4-(2'-bromo-[1,1'-biphenyl]-2-yl)-2-phenyl-4,5-dihydrooxazole (**4b**)

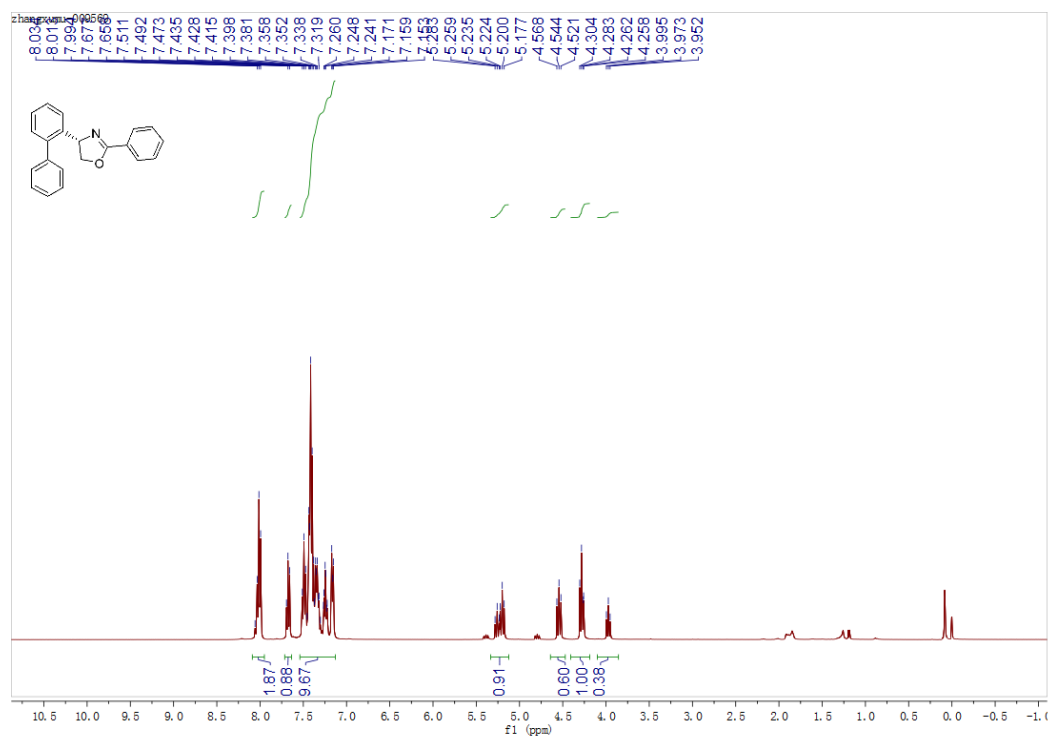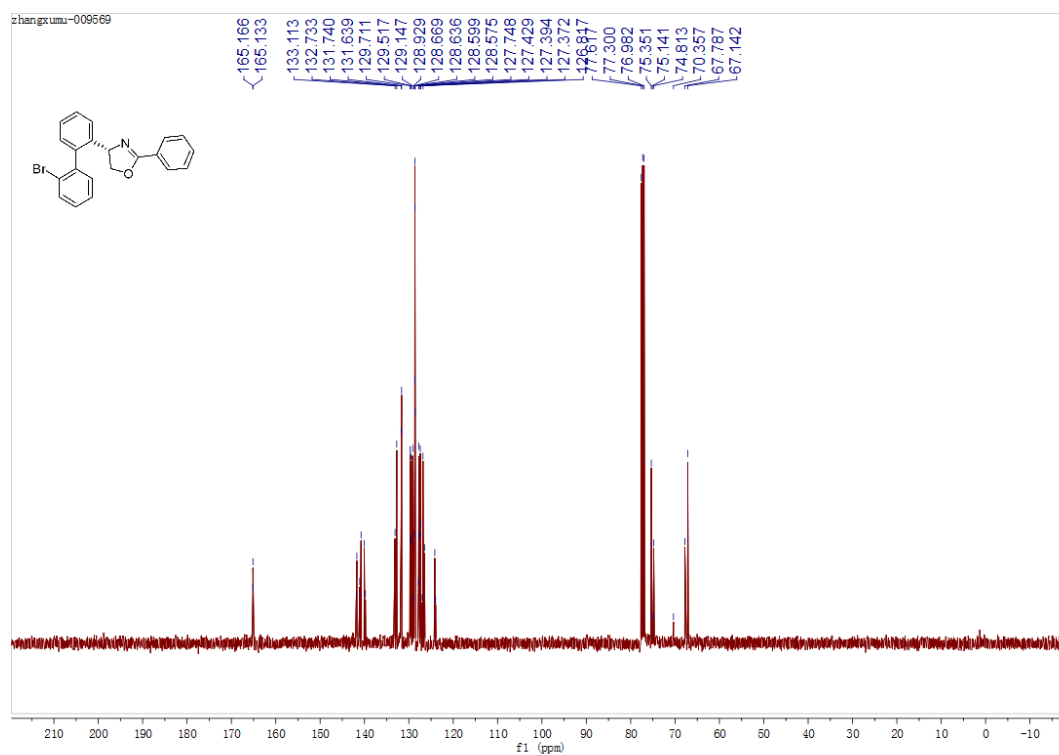

(S)-4-(2'-bromo-[1,1'-biphenyl]-2-yl)-2-(tert-butyl)-4,5-dihydrooxazole (**4c**)

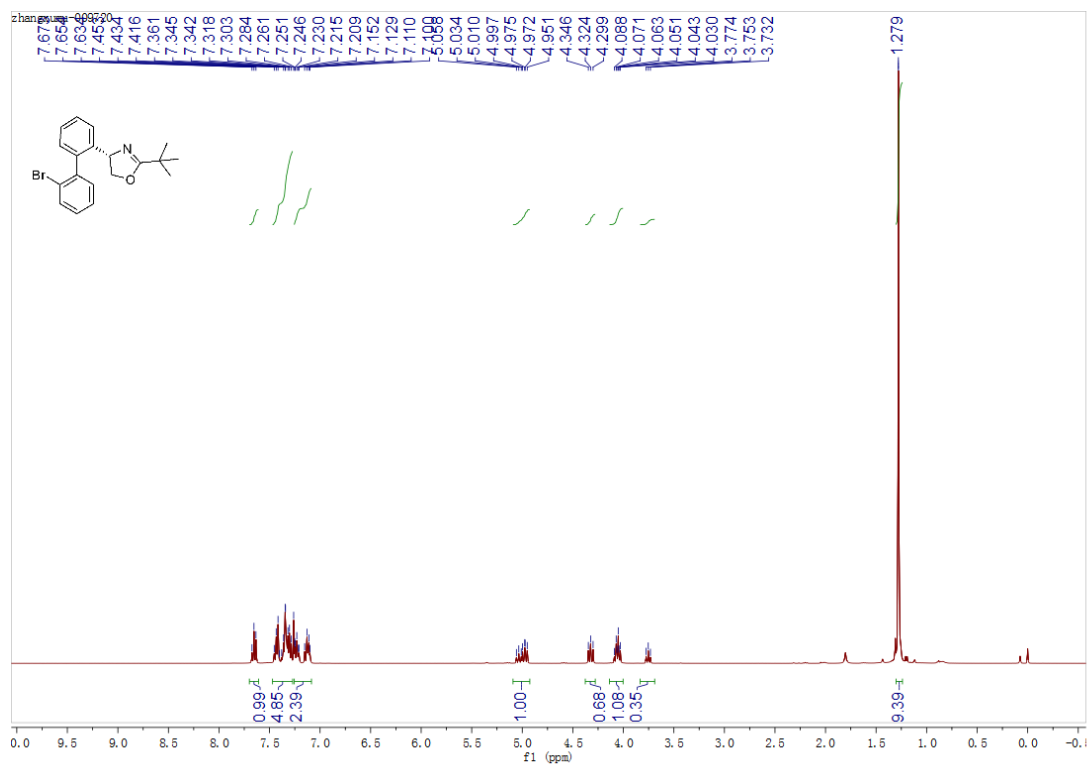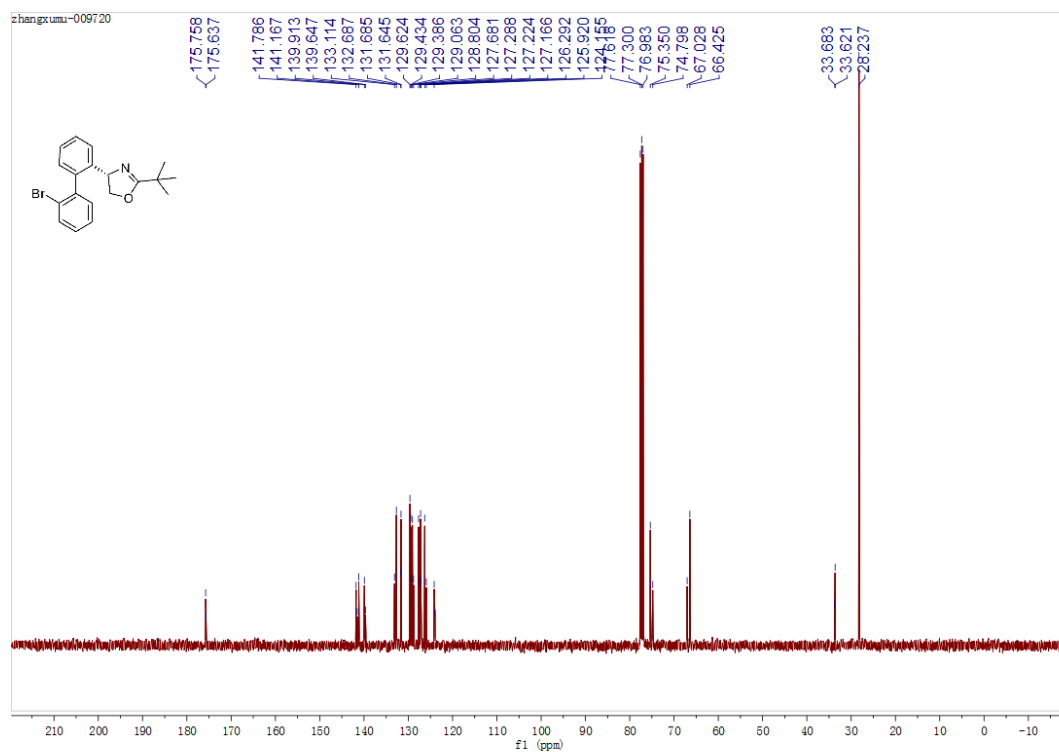

(S)-4-(2'-benzhydryl-[1,1'-biphenyl]-2-yl)-2-(3,5-di-tert-butylphenyl)-4,5-dihydrooxazole (**5a**)

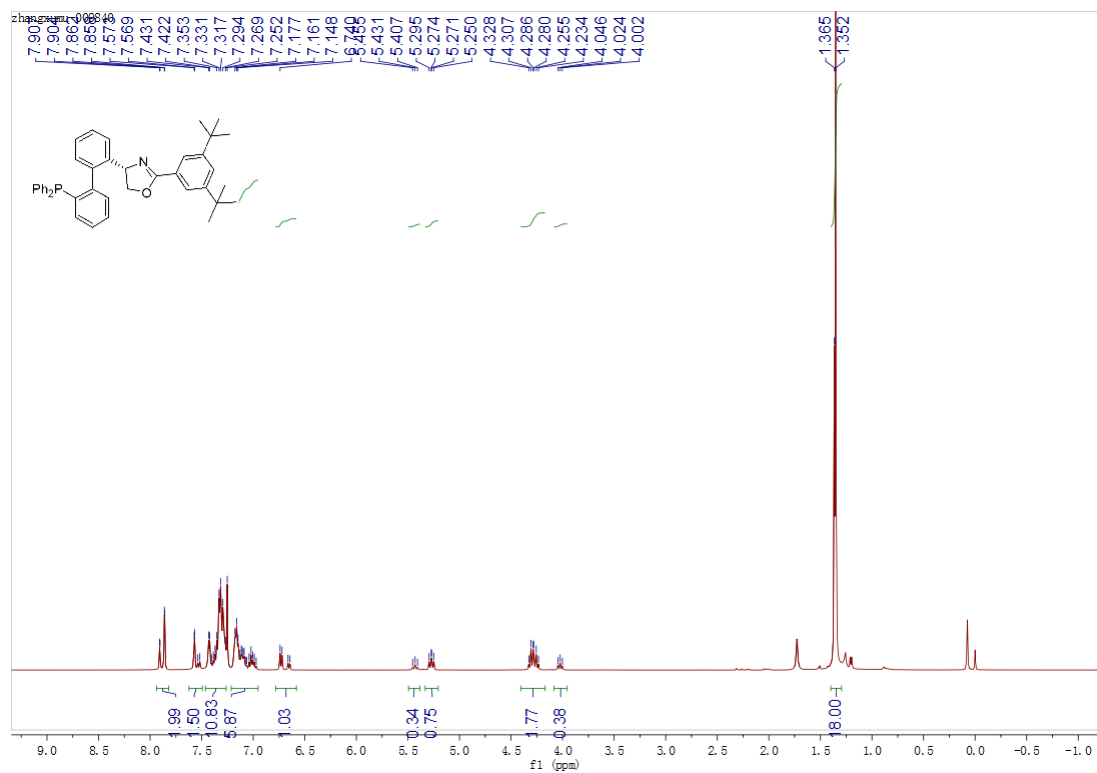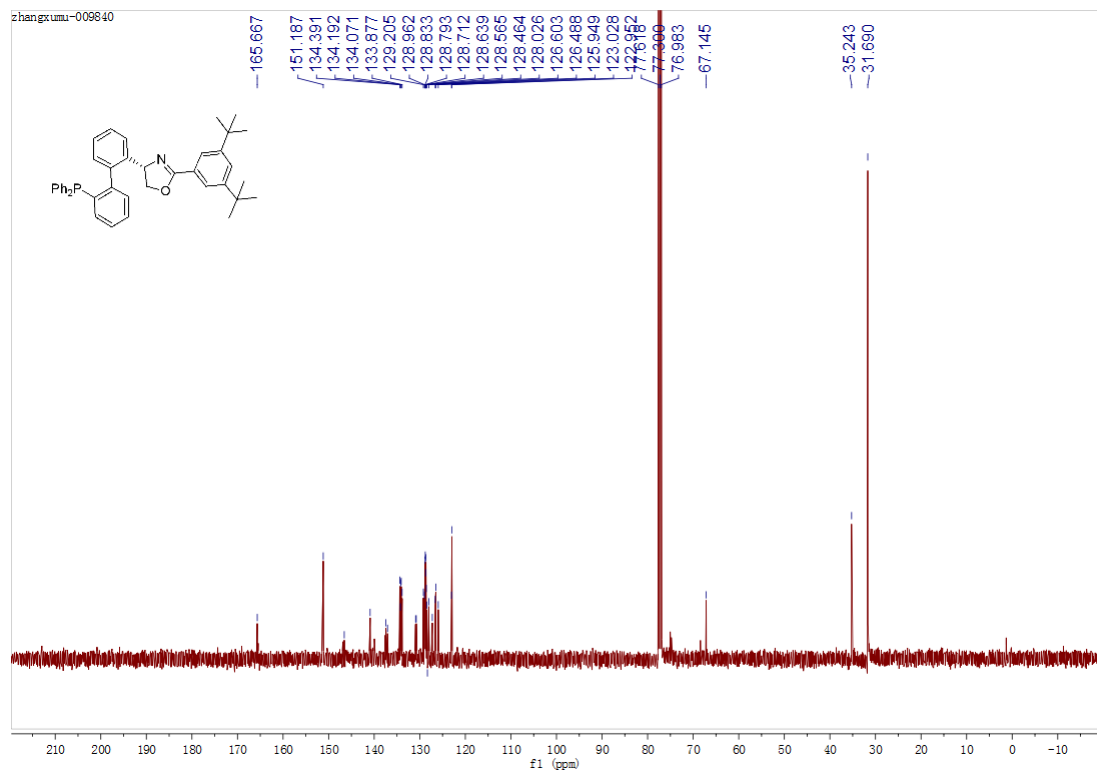

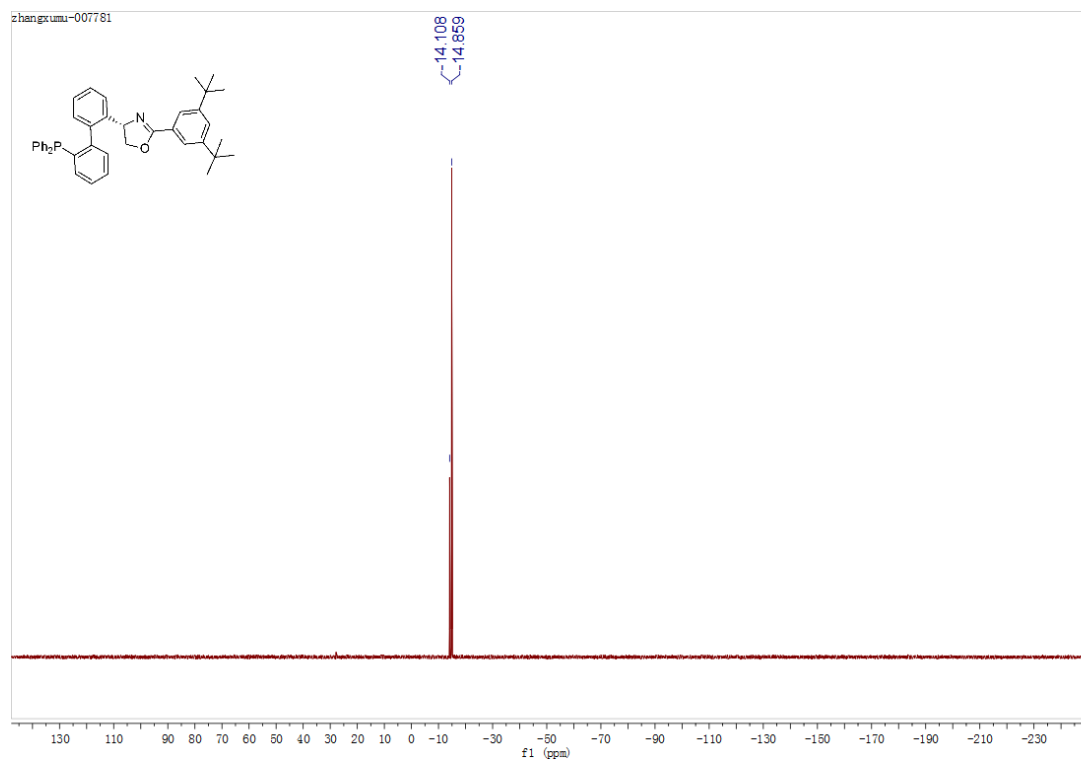

(*S*)-4-(2'-(diphenylphosphanyl)-[1,1'-biphenyl]-2-yl)-2-phenyl-4,5-dihydrooxazole (**5b**)

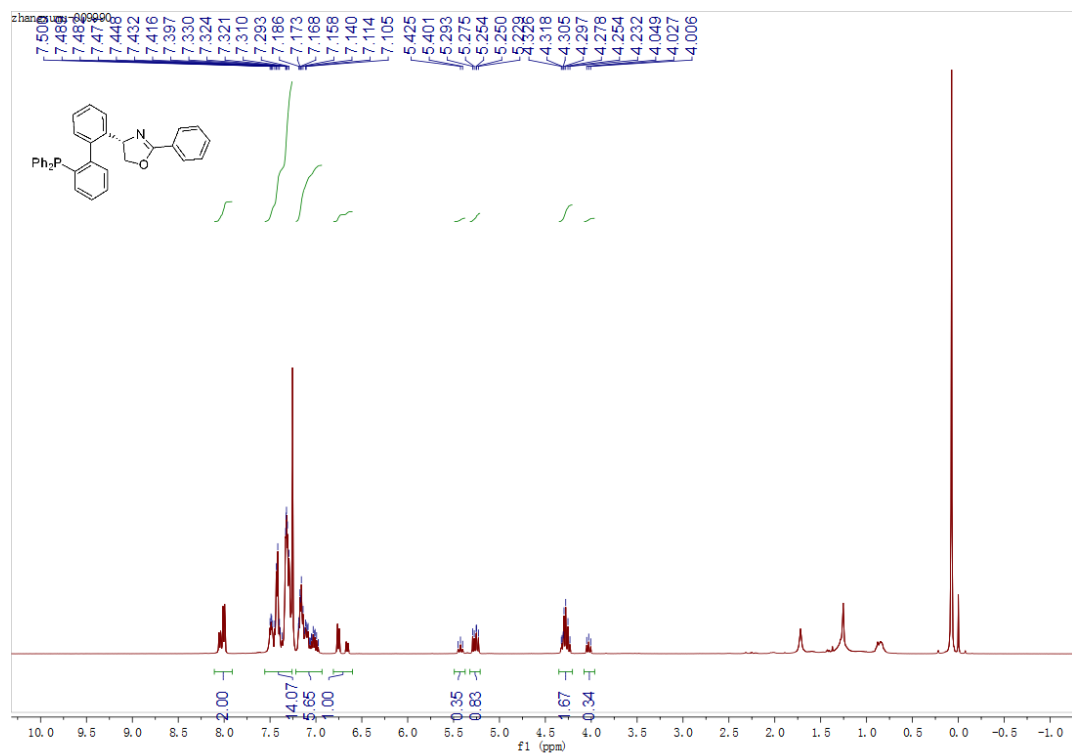

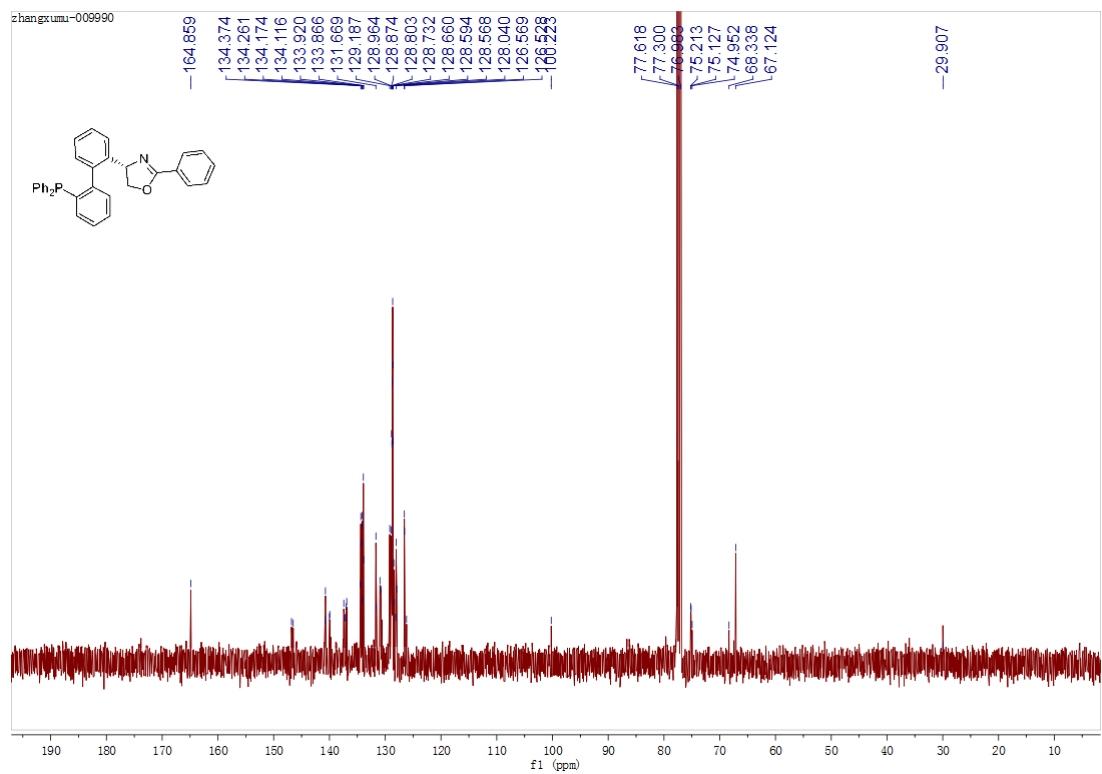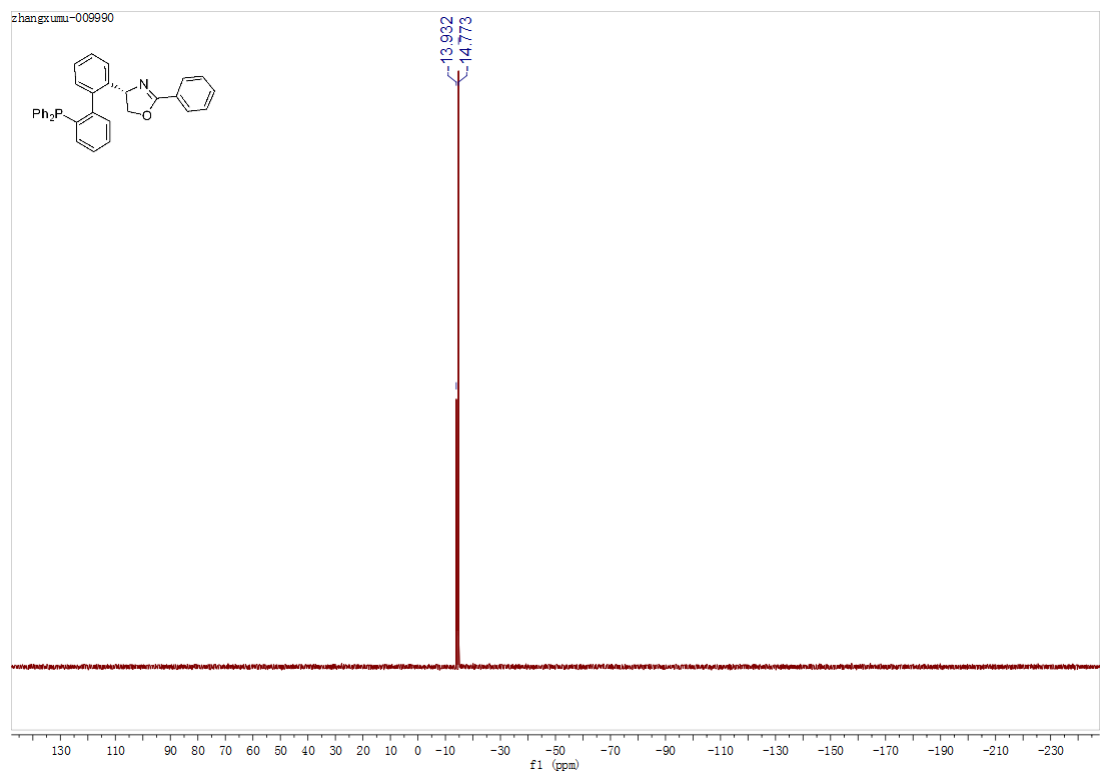



(S)-2-(tert-butyl)-4-(2'-(diphenylphosphanyl)-[1,1'-biphenyl]-2-yl)-4,5-dihydrooxazole (5c)

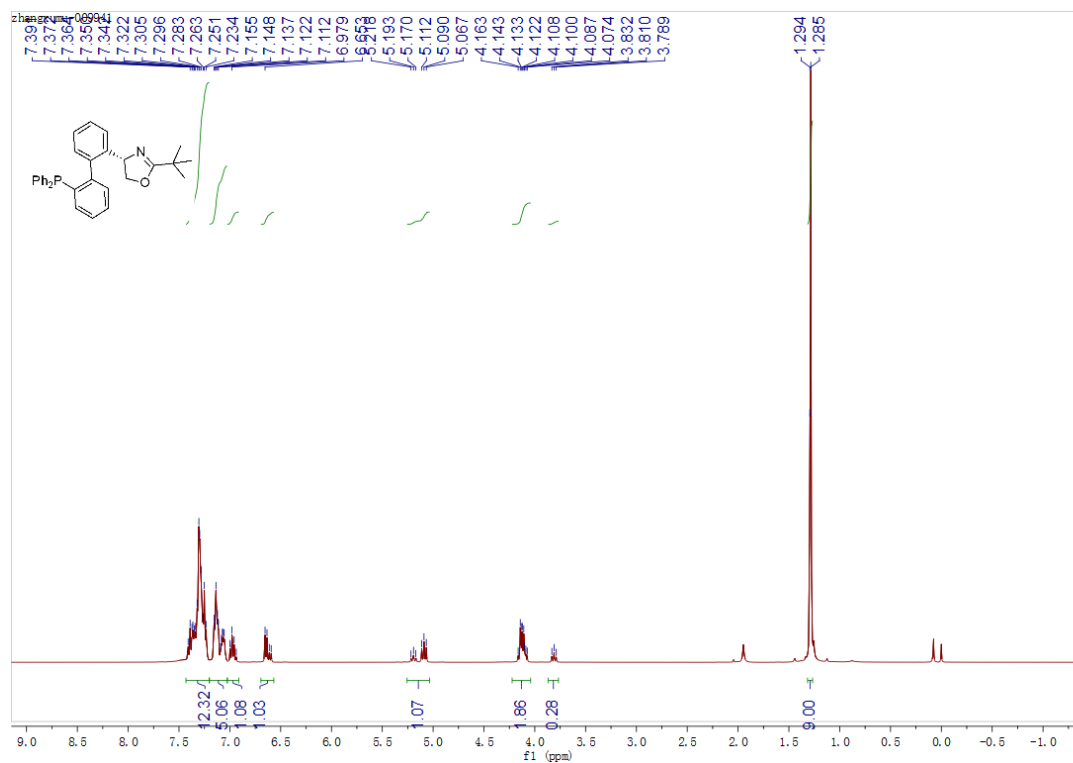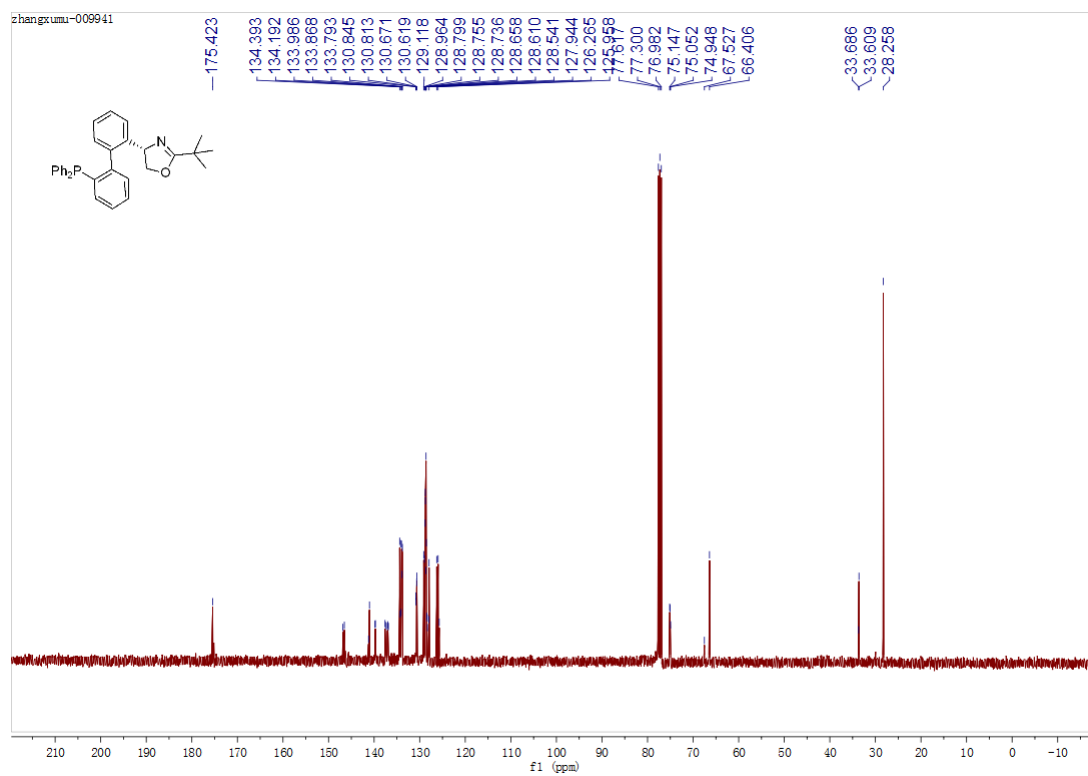

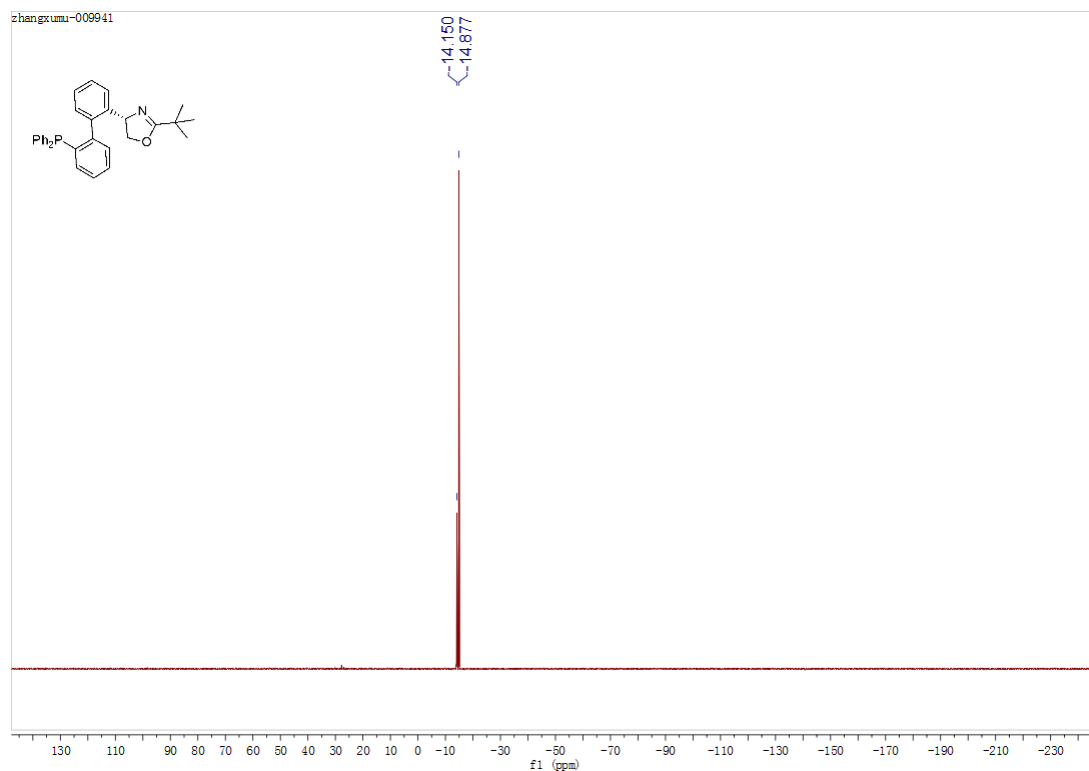

(*S*)-2-(3,5-di-*tert*-butylphenyl)-4-(2'-(dicyclohexylphosphanyl)-[1,1'-biphenyl]-2-yl)-4,5-dihydrooxazole (**5d**)

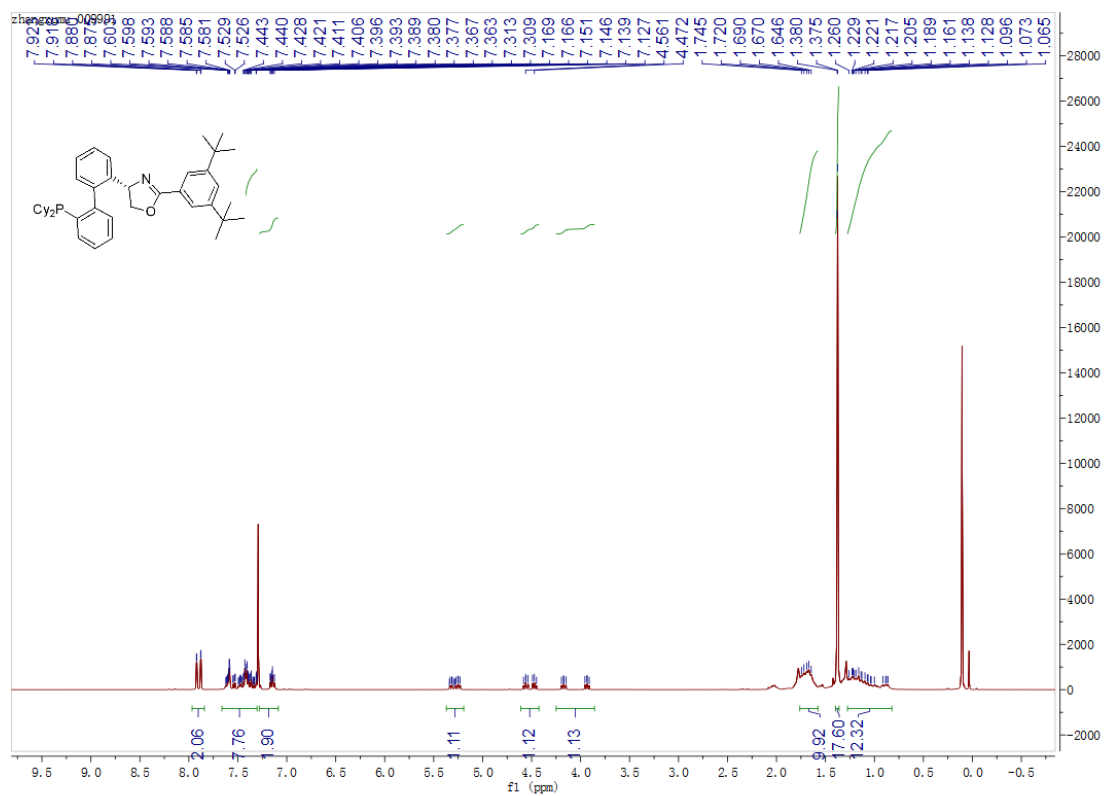

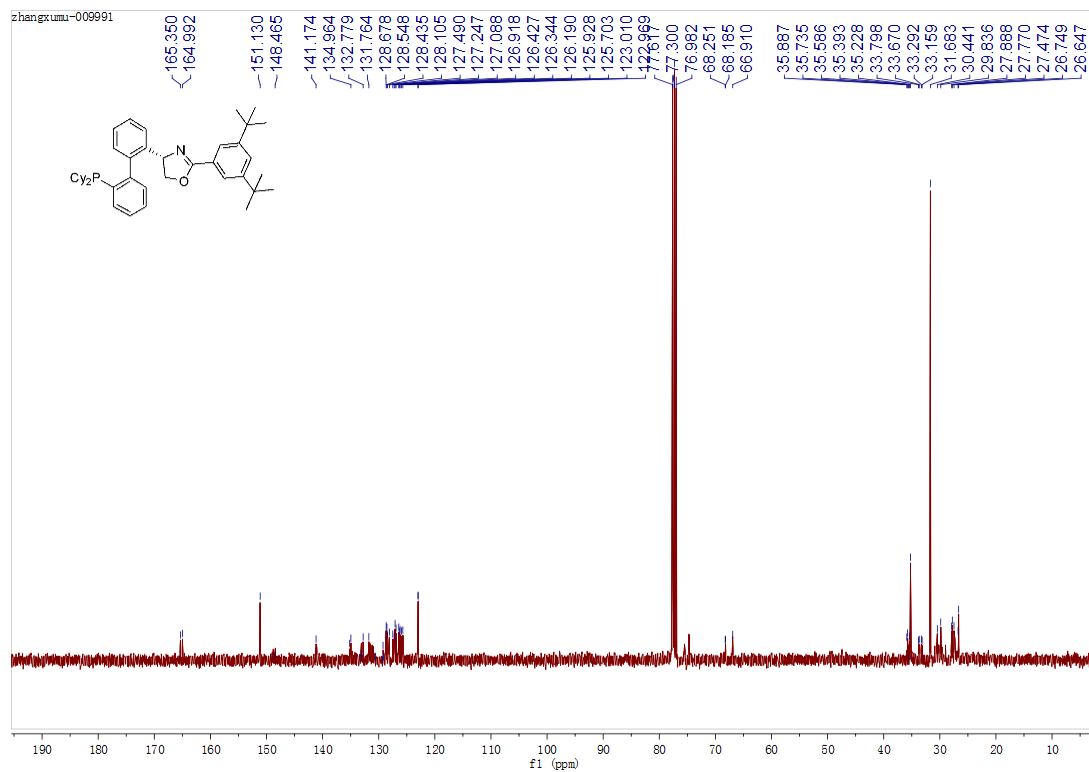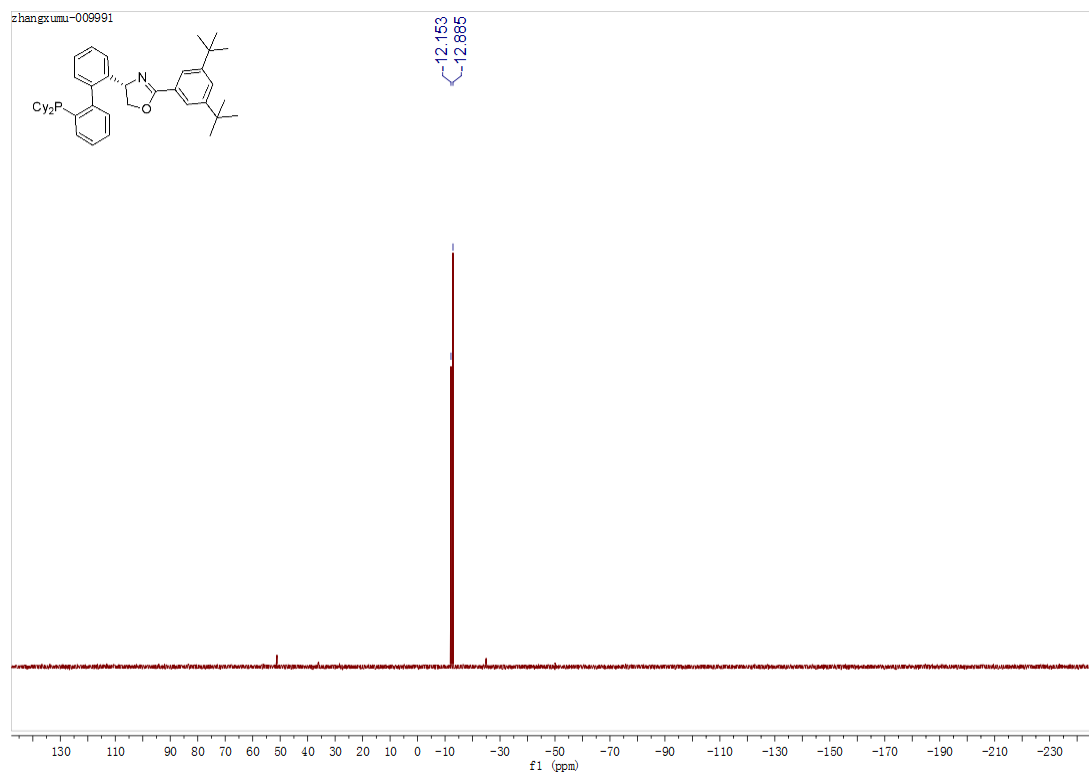

[Ir(L)COD]BARF complex **6a**

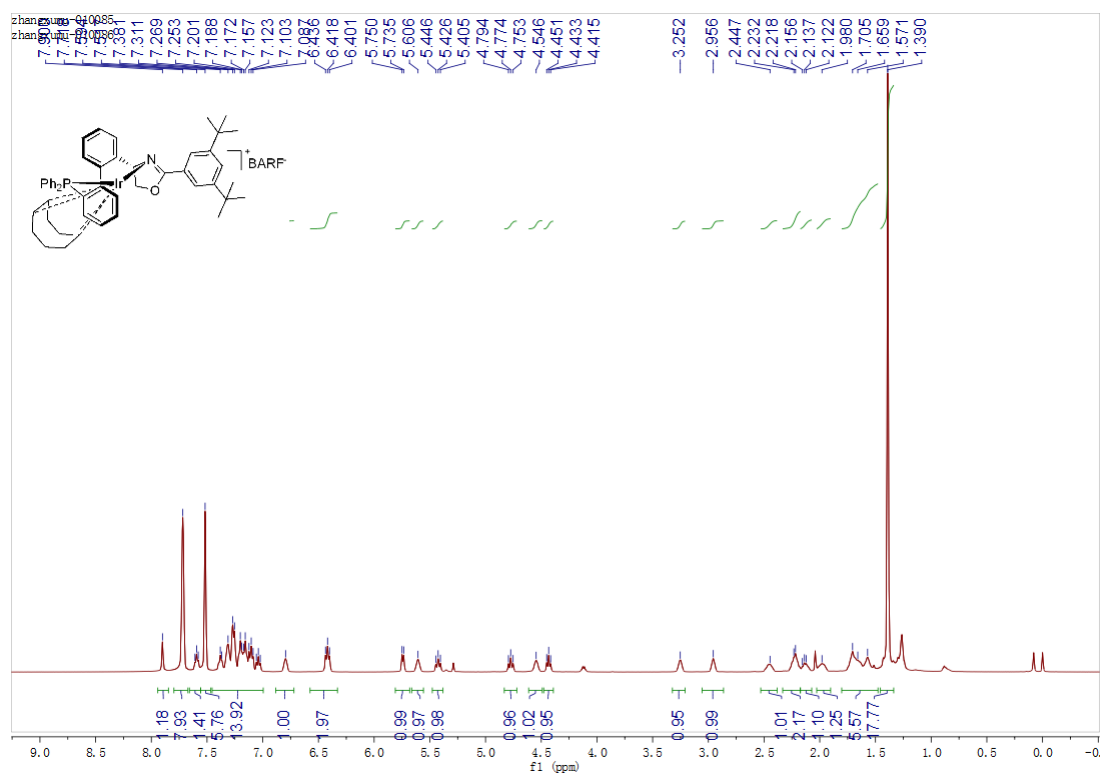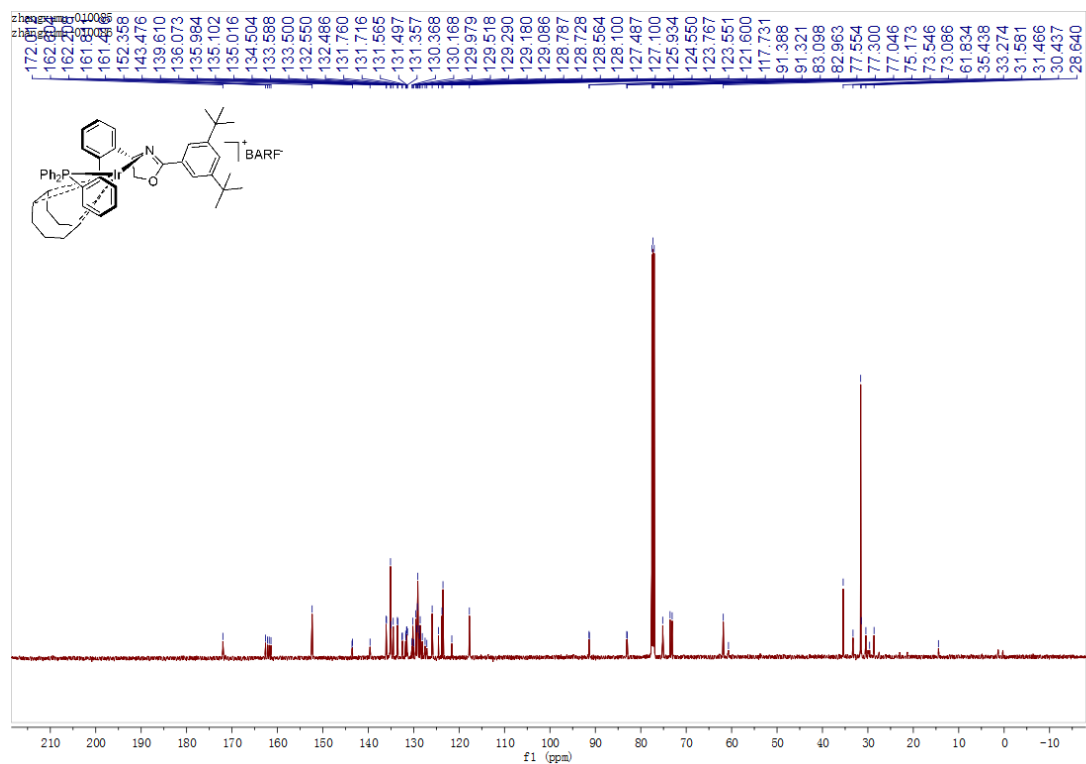

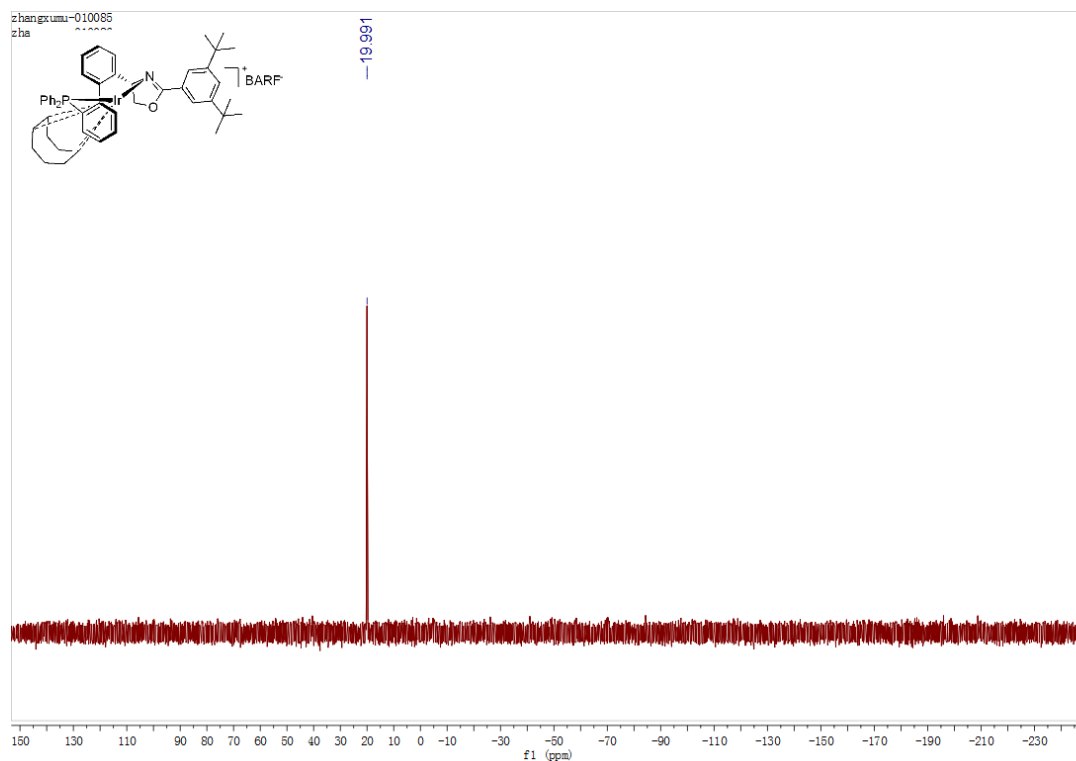

[Ir(L)COD]BARF complex **6b**

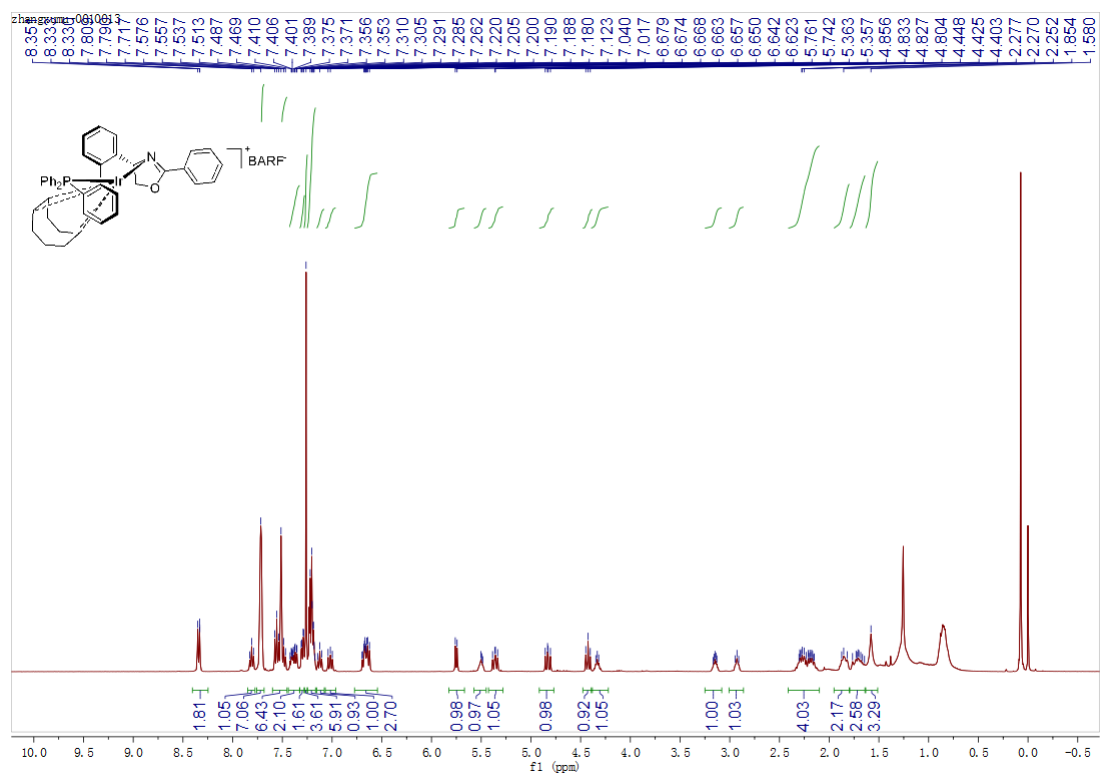

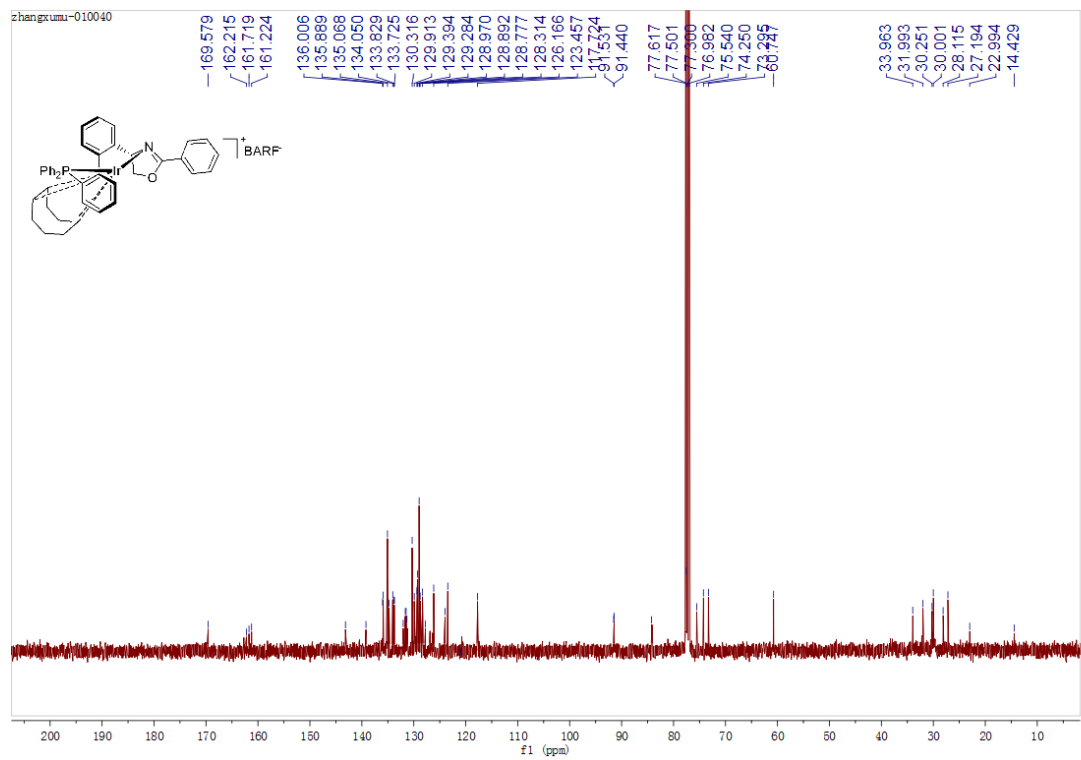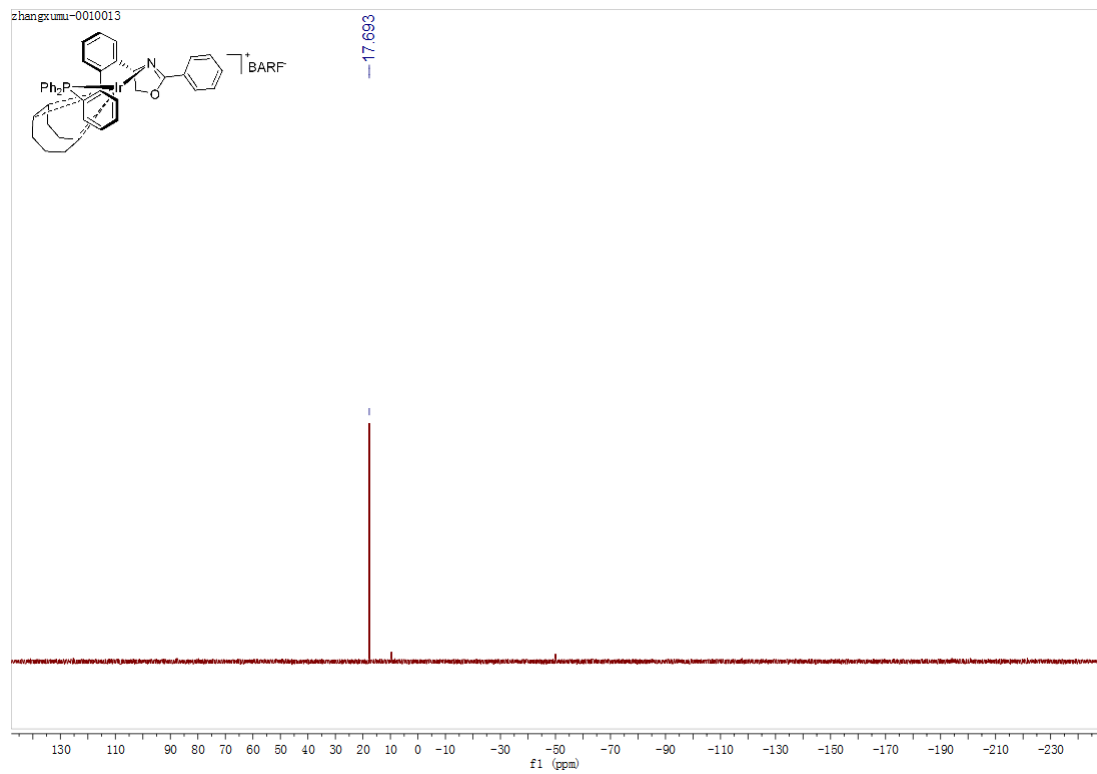

[Ir(L)COD]BARF complex **6c**

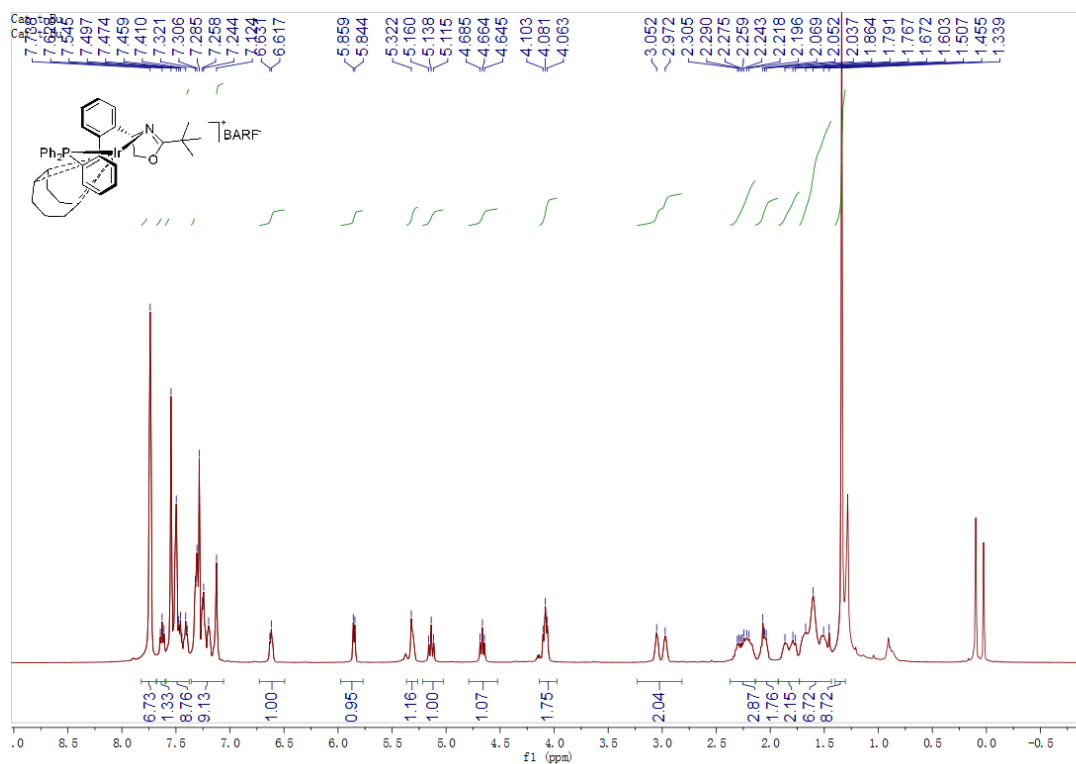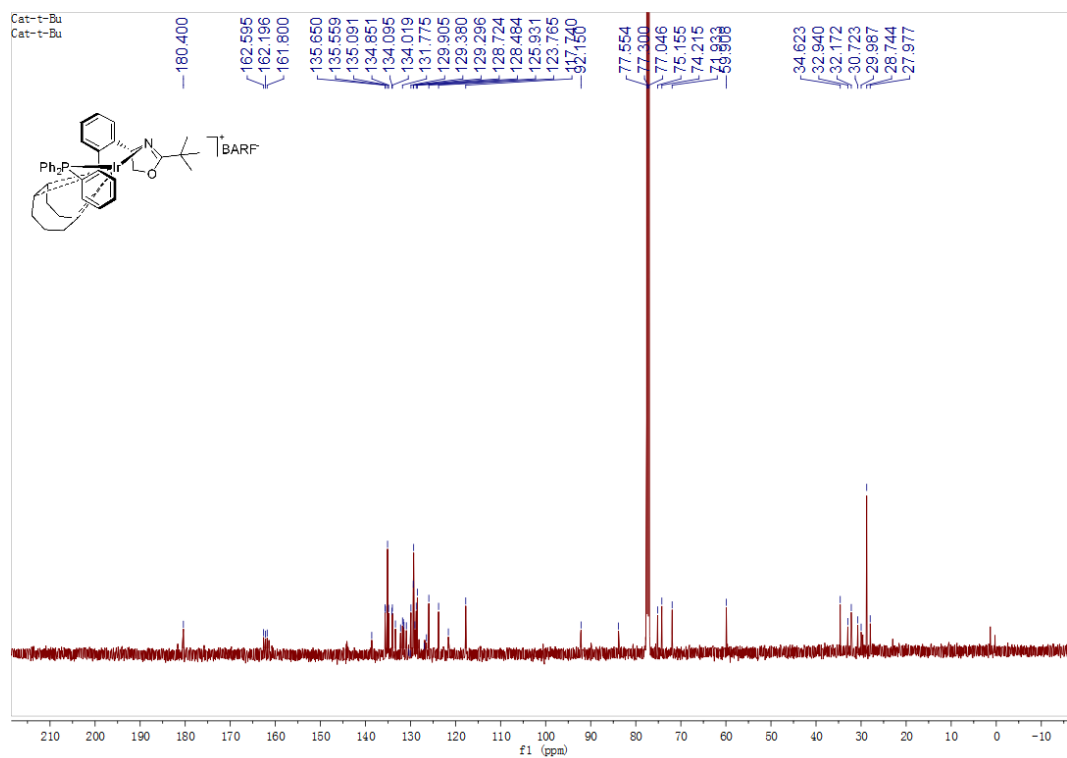

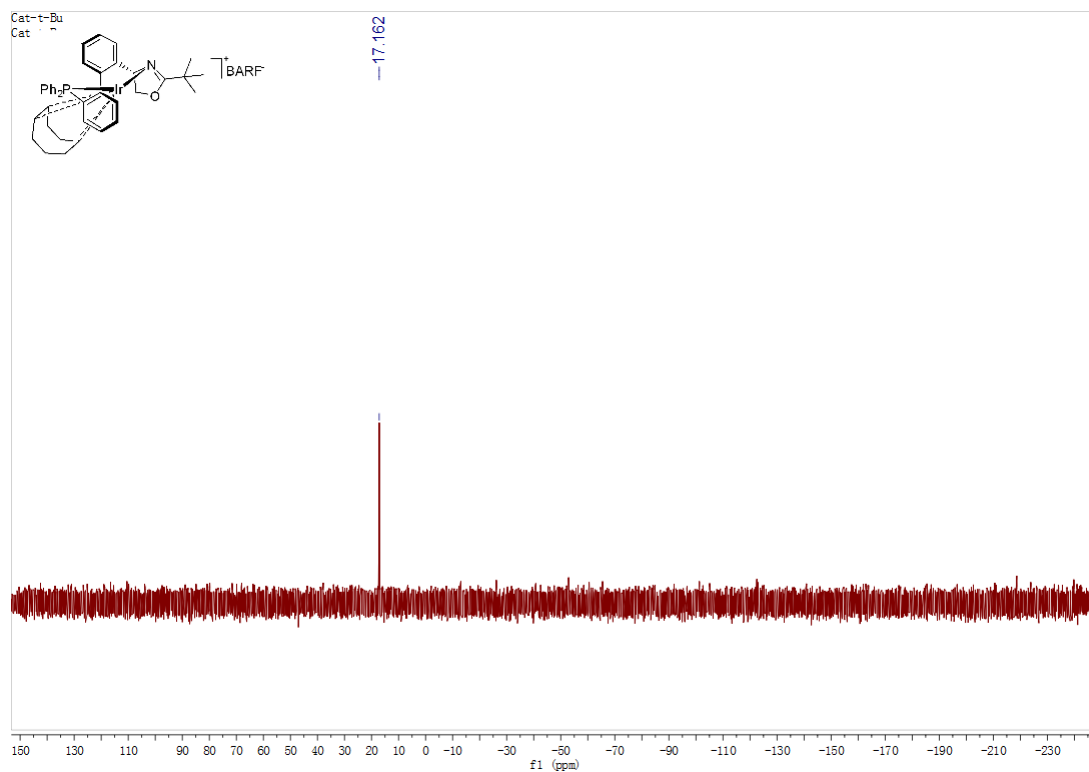

**[Ir(L)COD]BARF complex 6d**

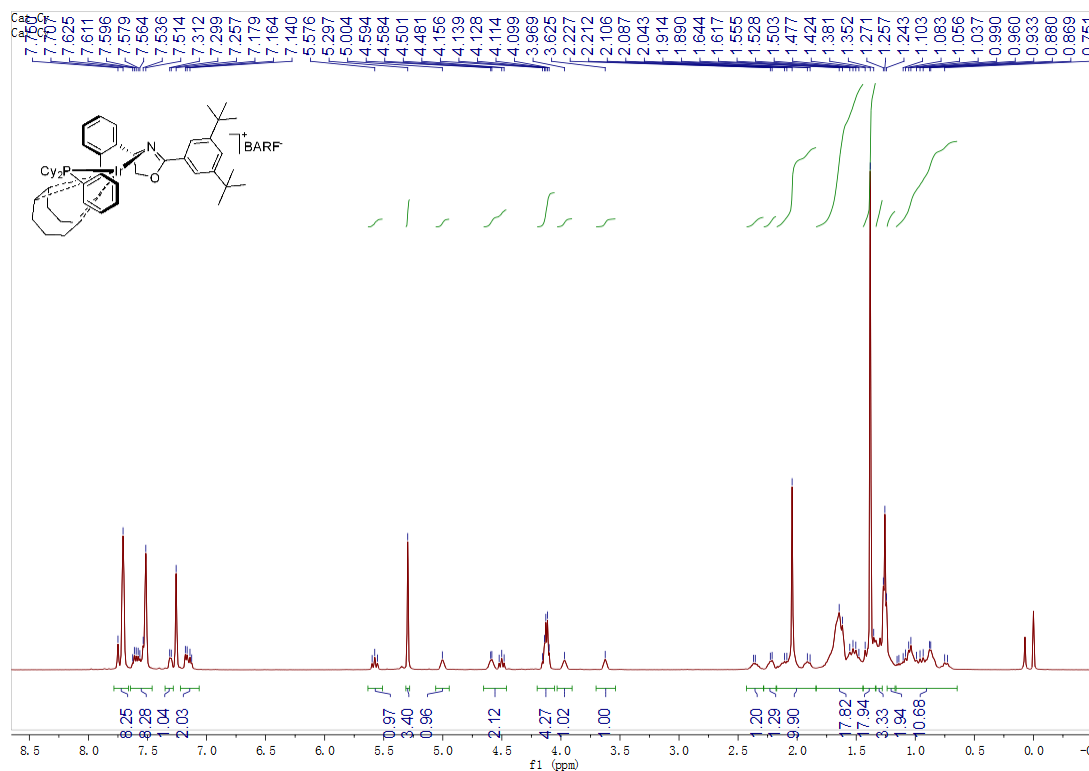



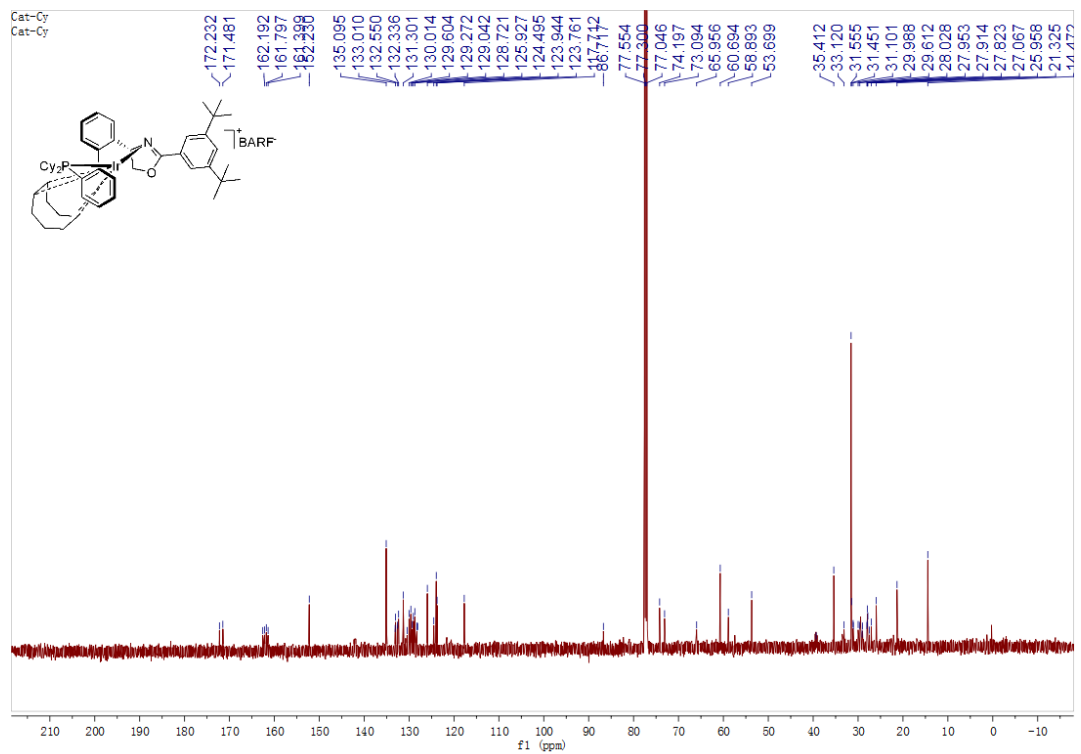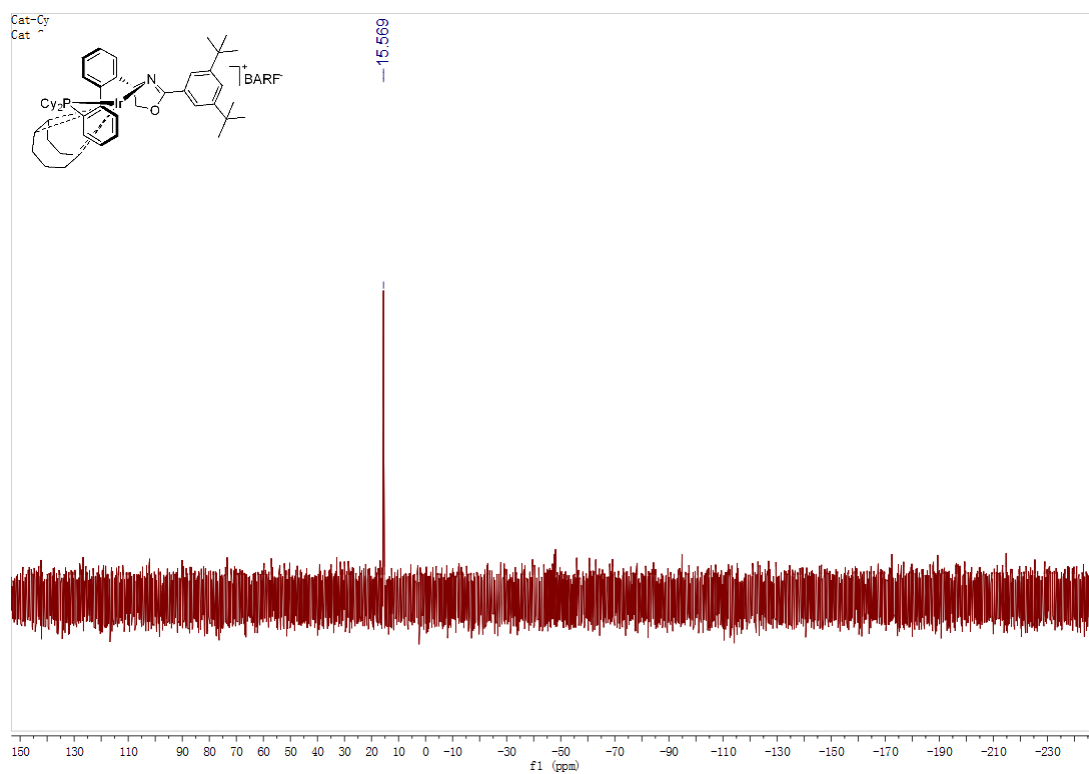

*(R)*-2-methyl-3-phenylpropanoic acid **8a**

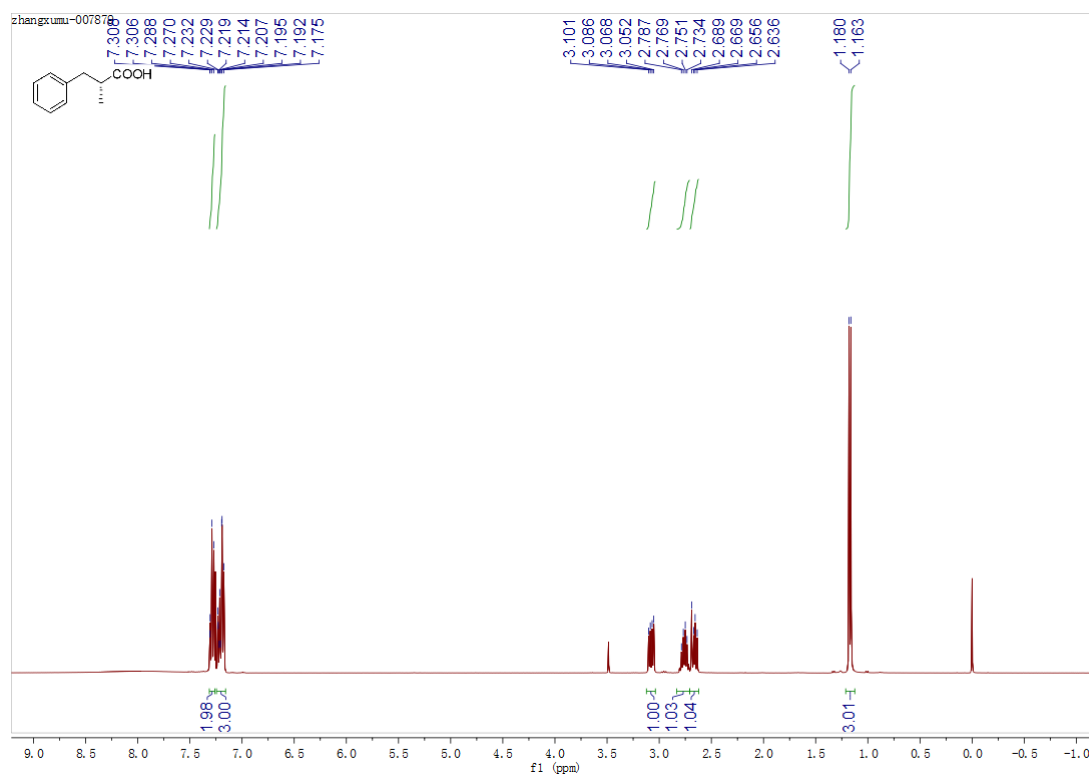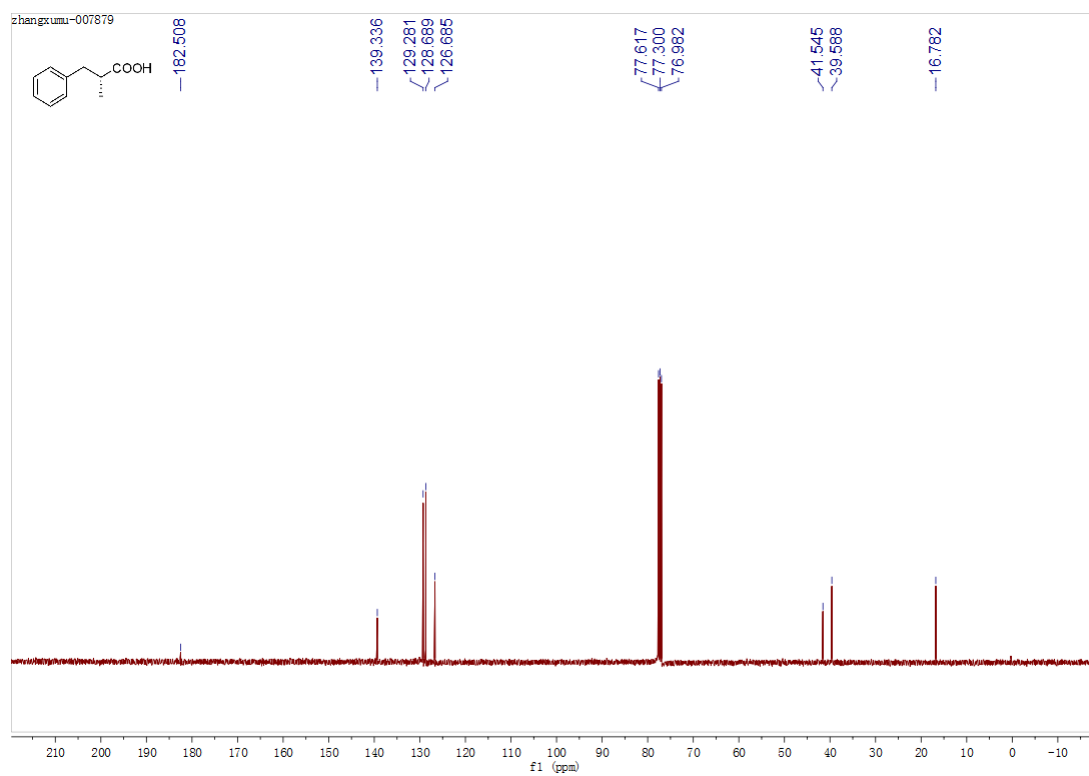

*(R)*-2-methyl-3-(*o*-tolyl)propanoic acid **8b**

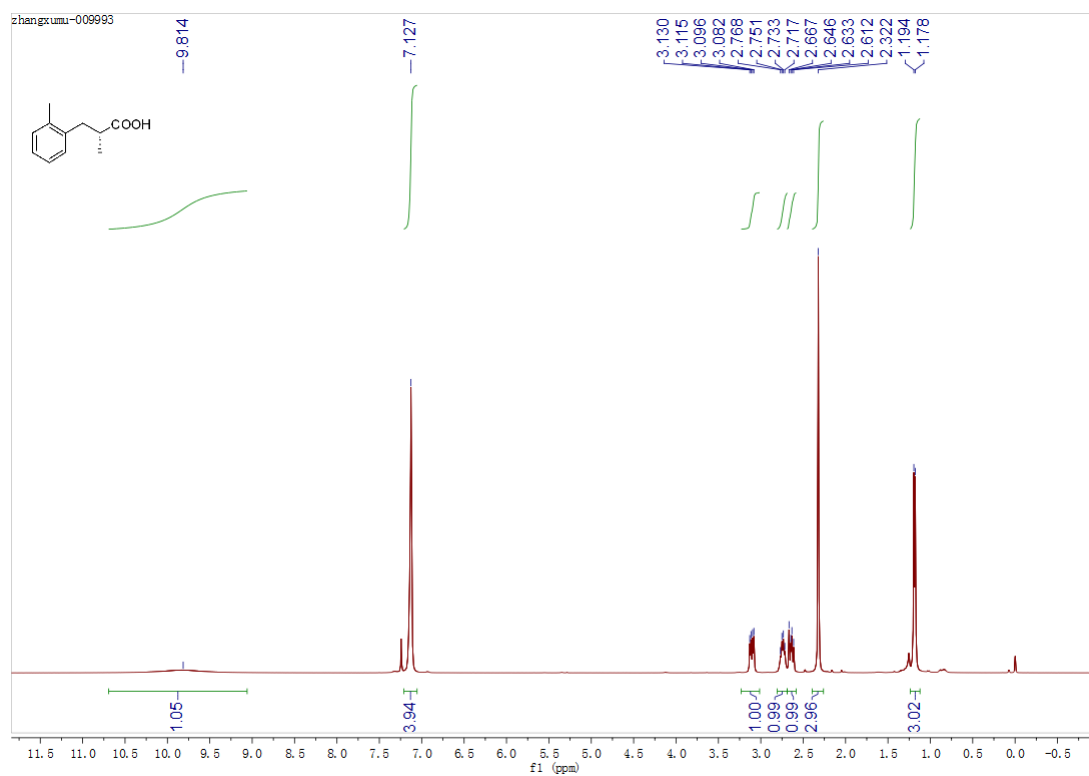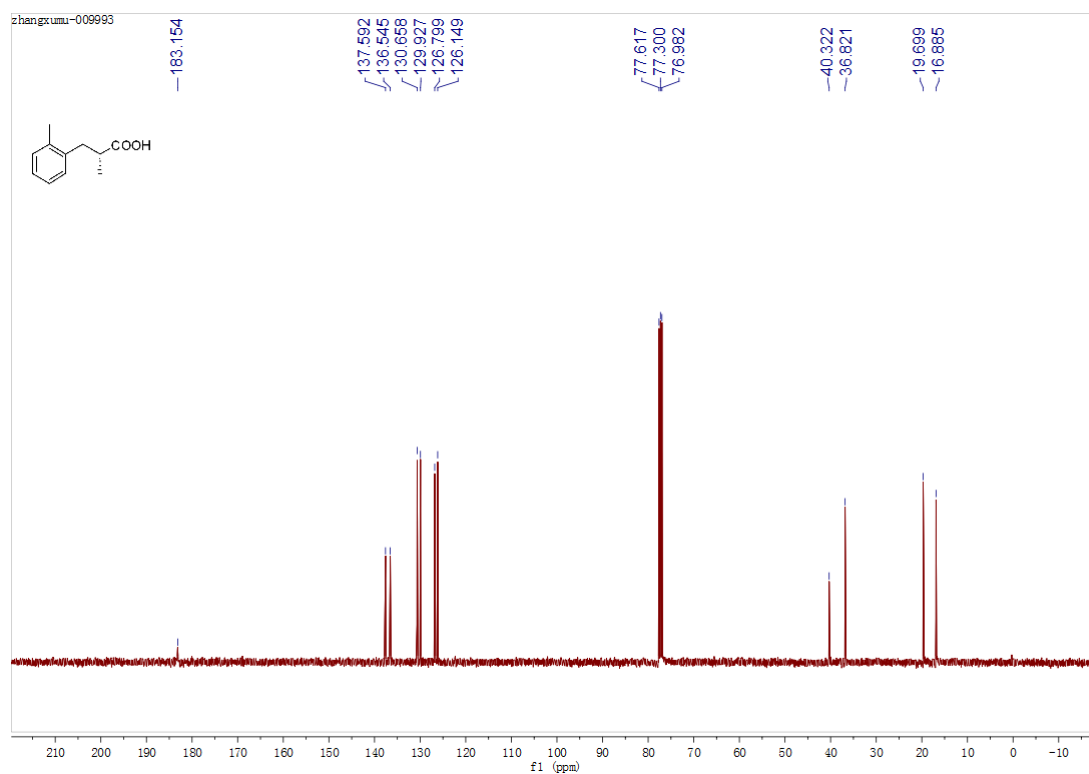

(*R*)-2-methyl-3-(*p*-tolyl)propanoic acid **8c**

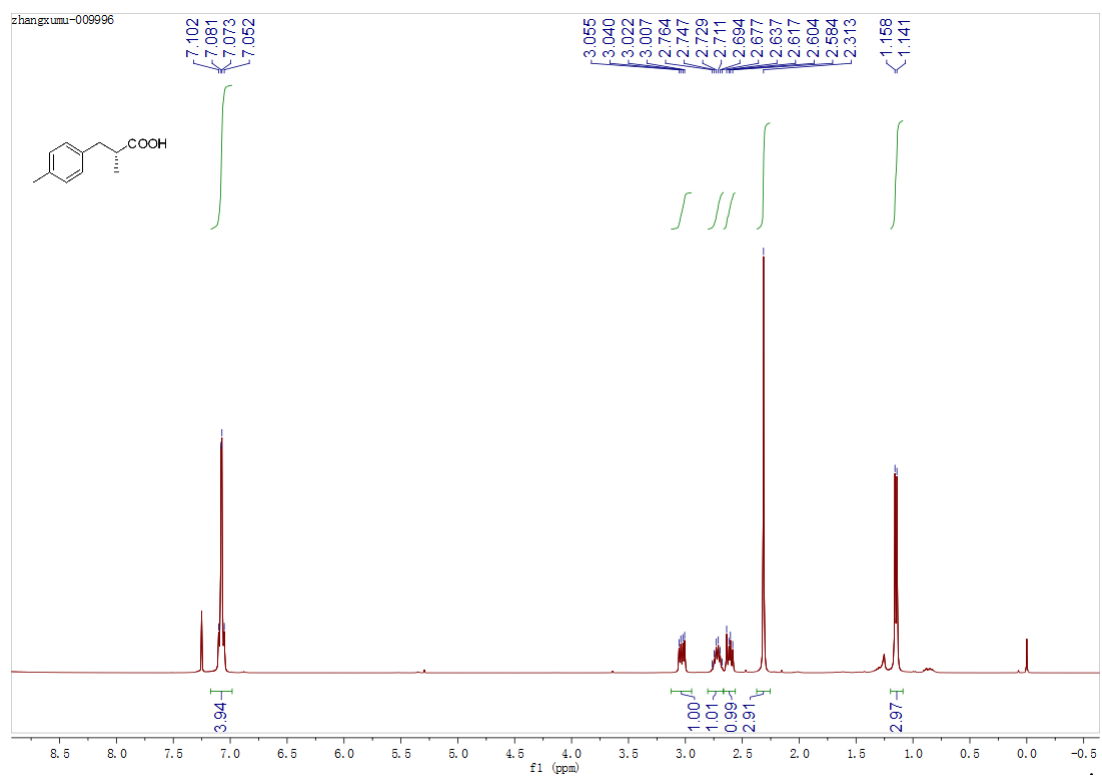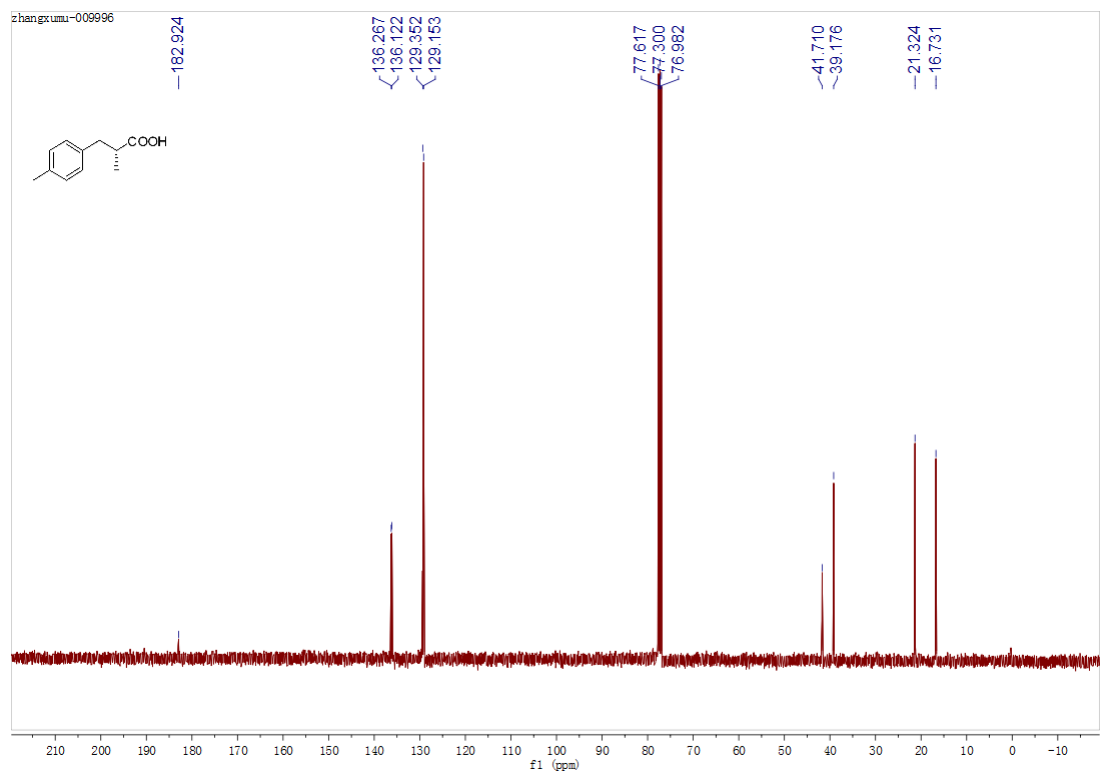

(R)-3-(3,4-dimethylphenyl)-2-methylpropanoic acid **8d**

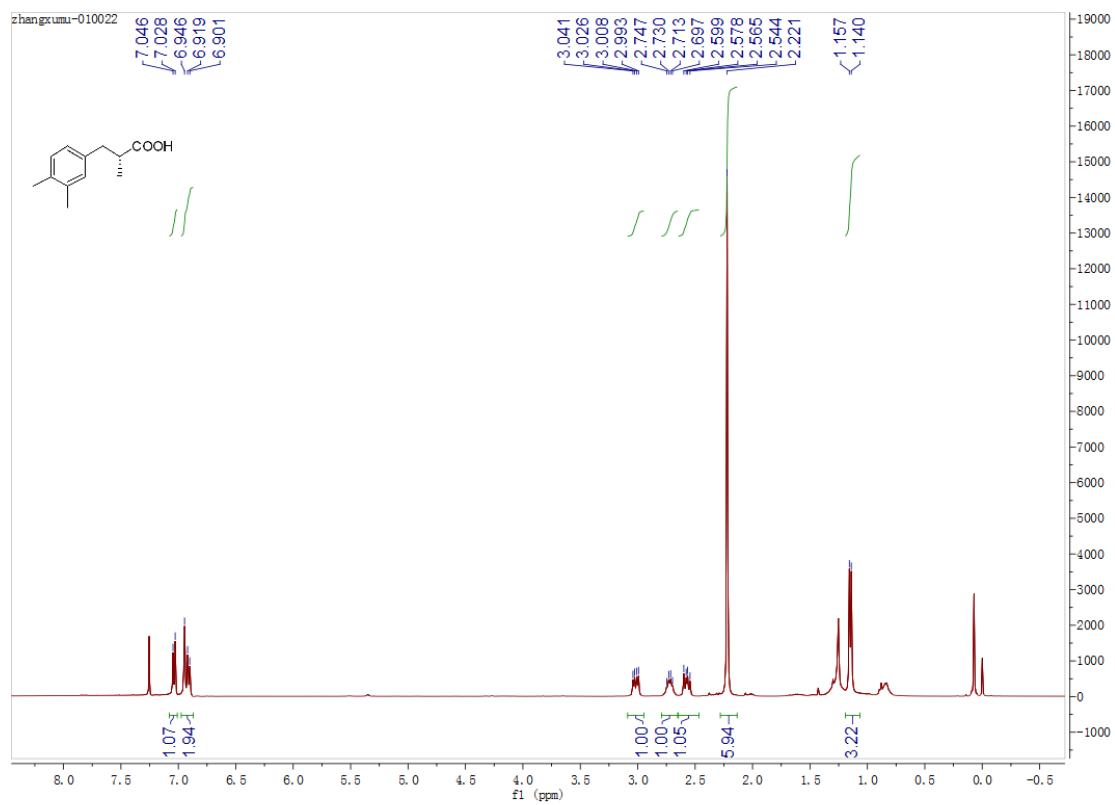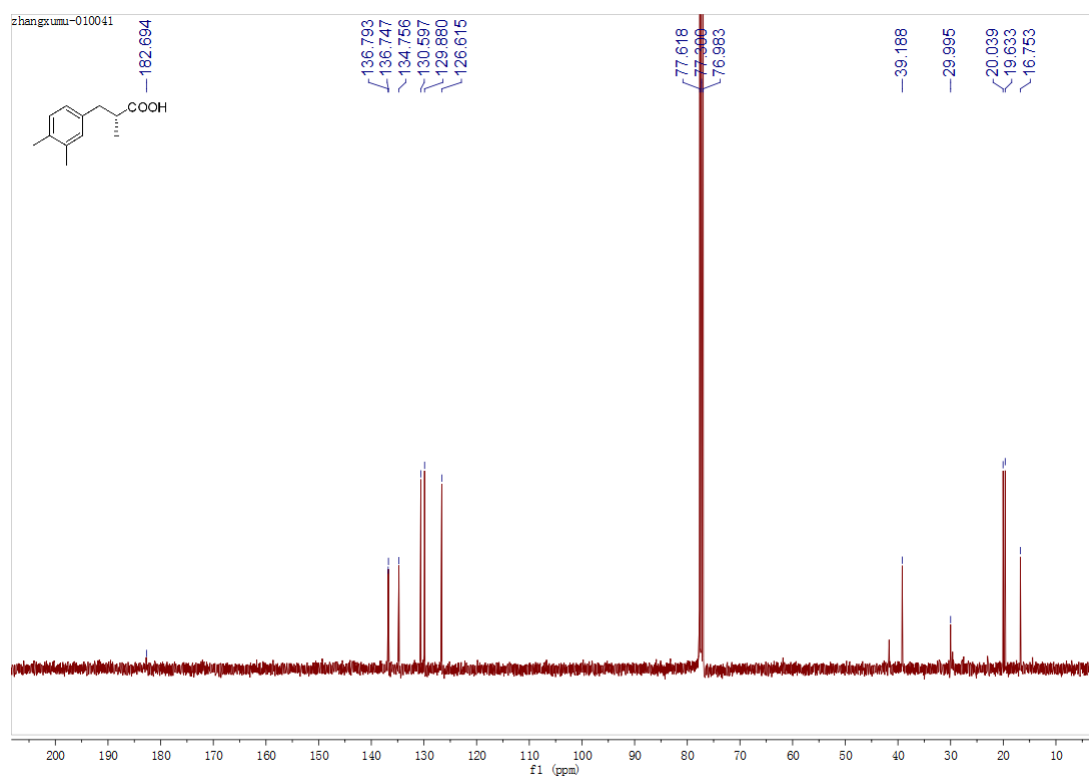

*(R)*-3-(2-methoxyphenyl)-2-methylpropanoic acid **8e**

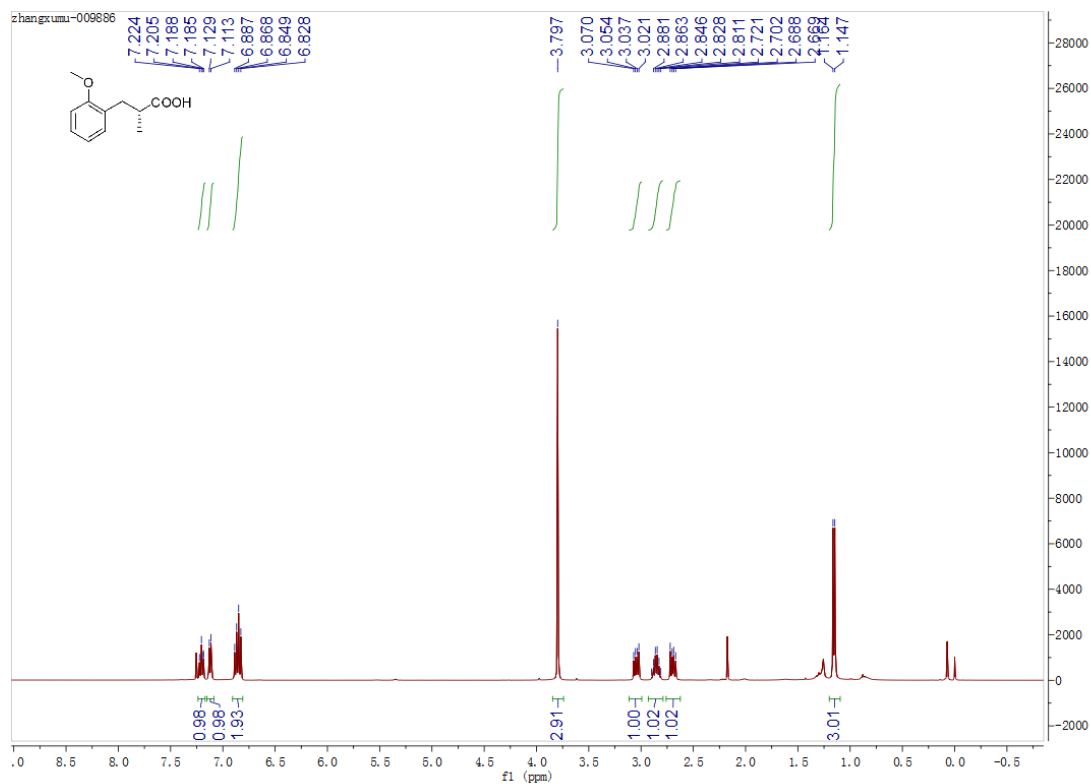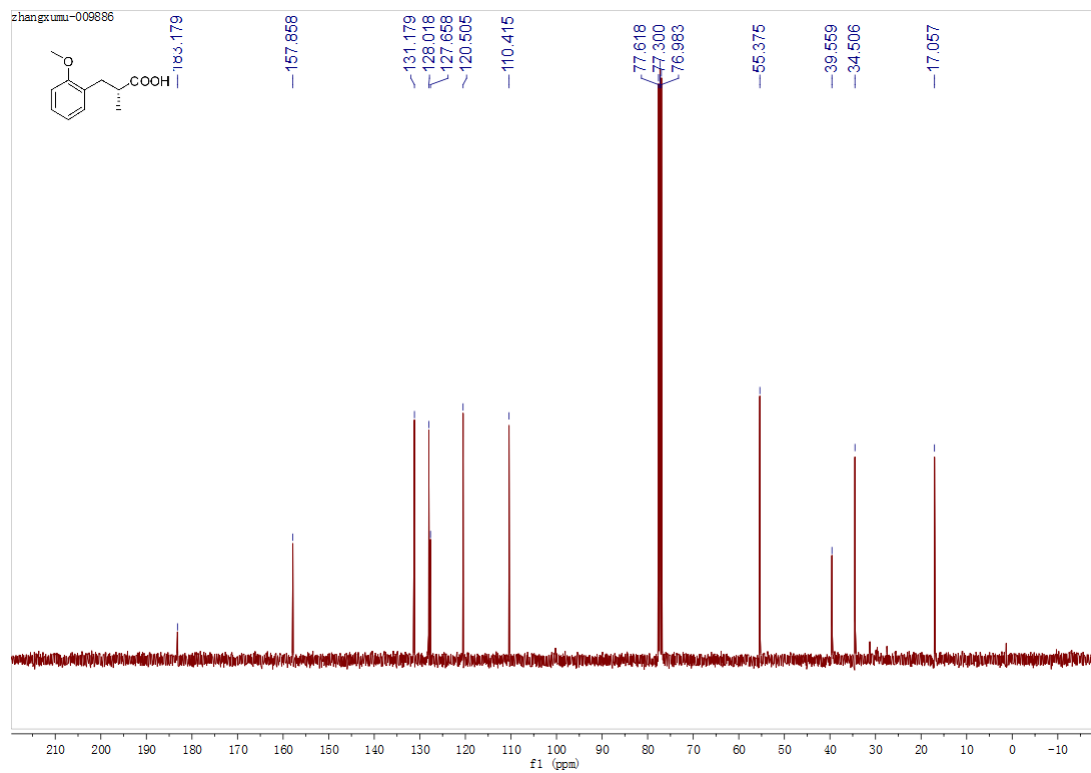

*(R)*-3-(3-methoxyphenyl)-2-methylpropanoic acid **8f**

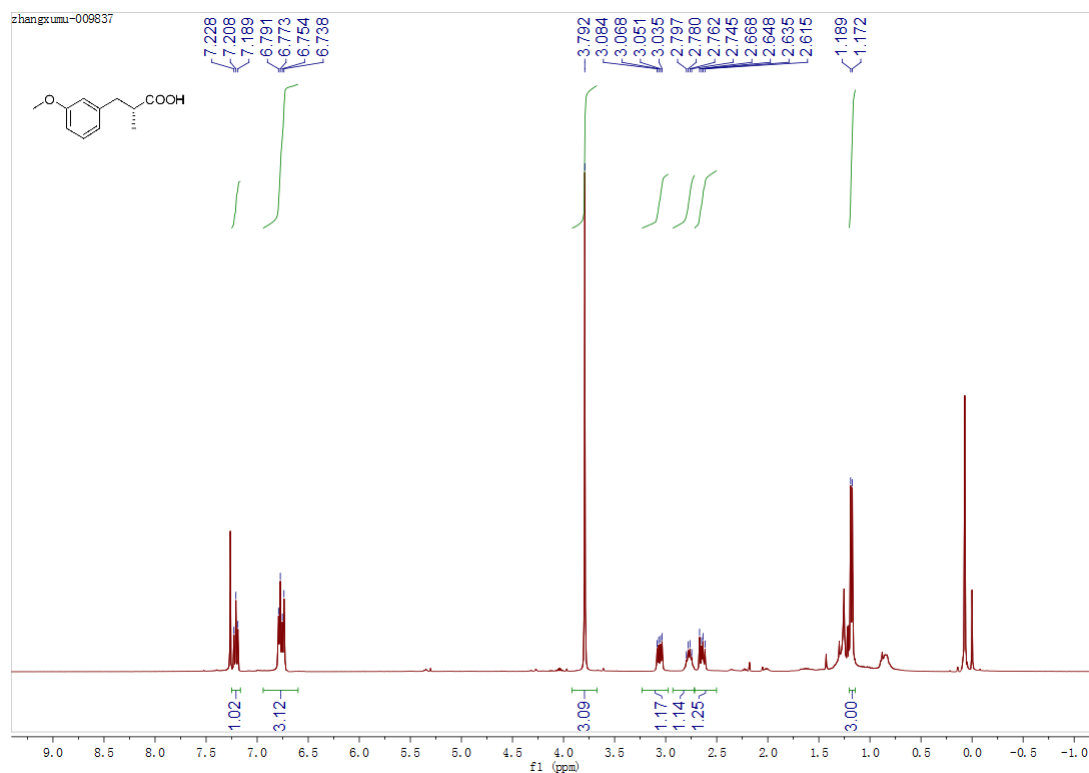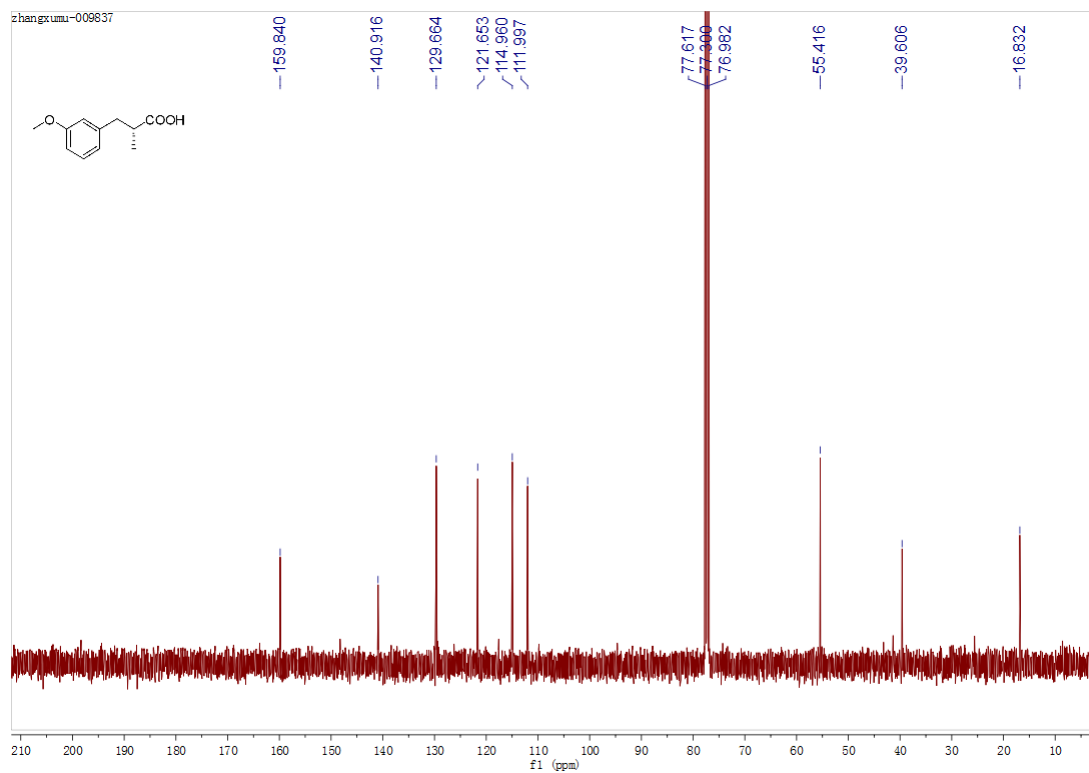

**(R)-3-(4-methoxyphenyl)-2-methylpropanoic acid 8g**

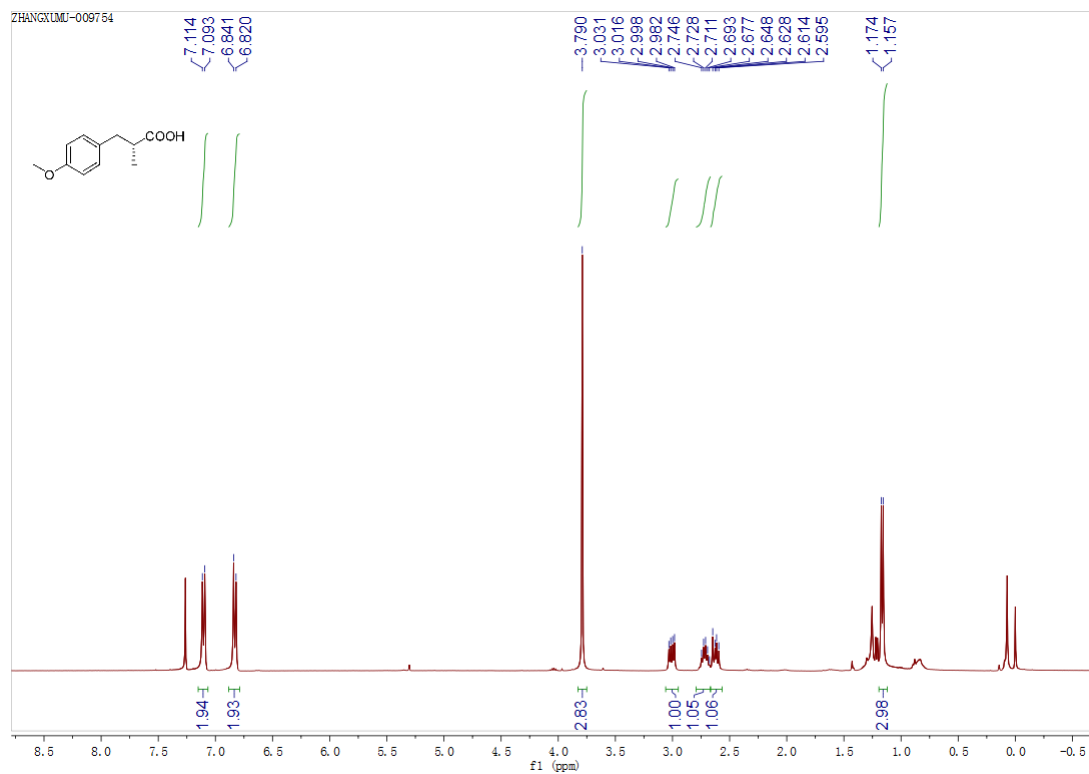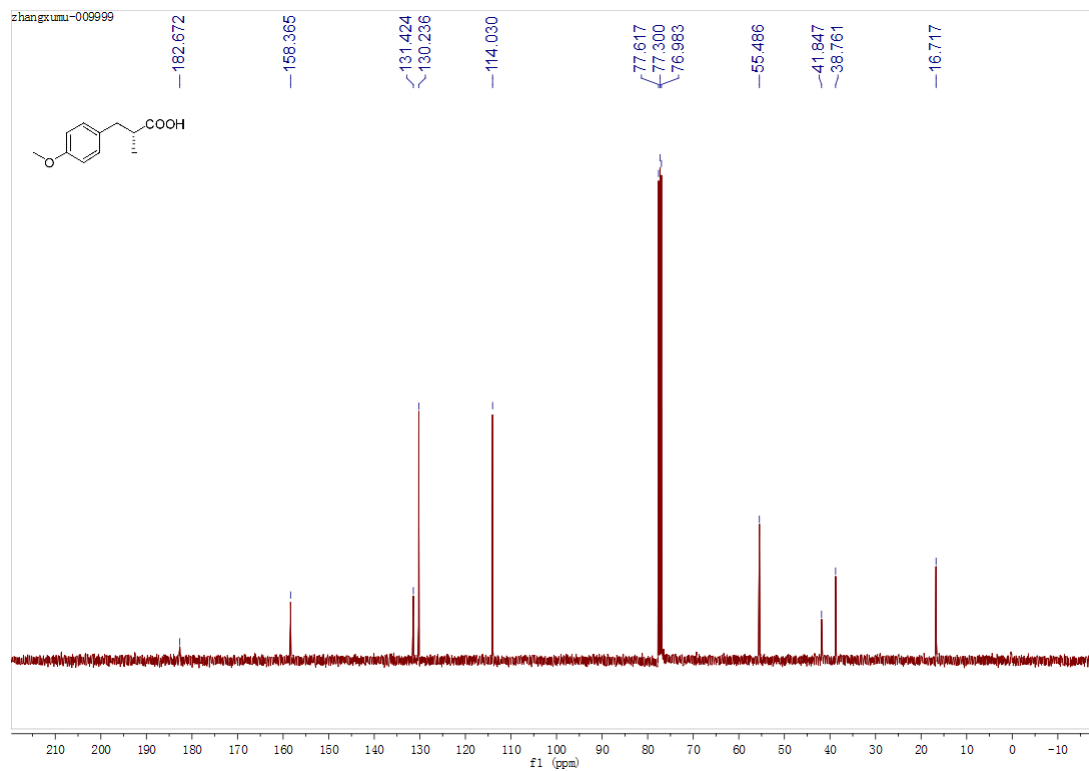



*(R)*-2-methyl-3-(3,4,5-trimethoxyphenyl)propanoic acid **8h**

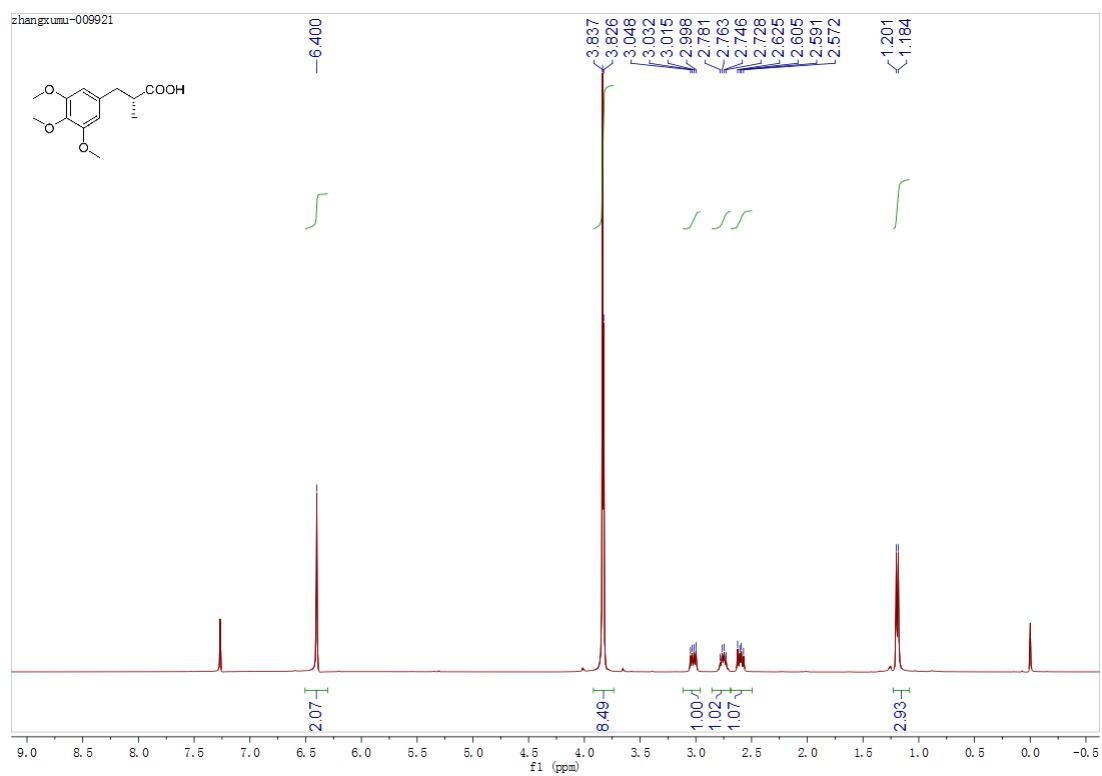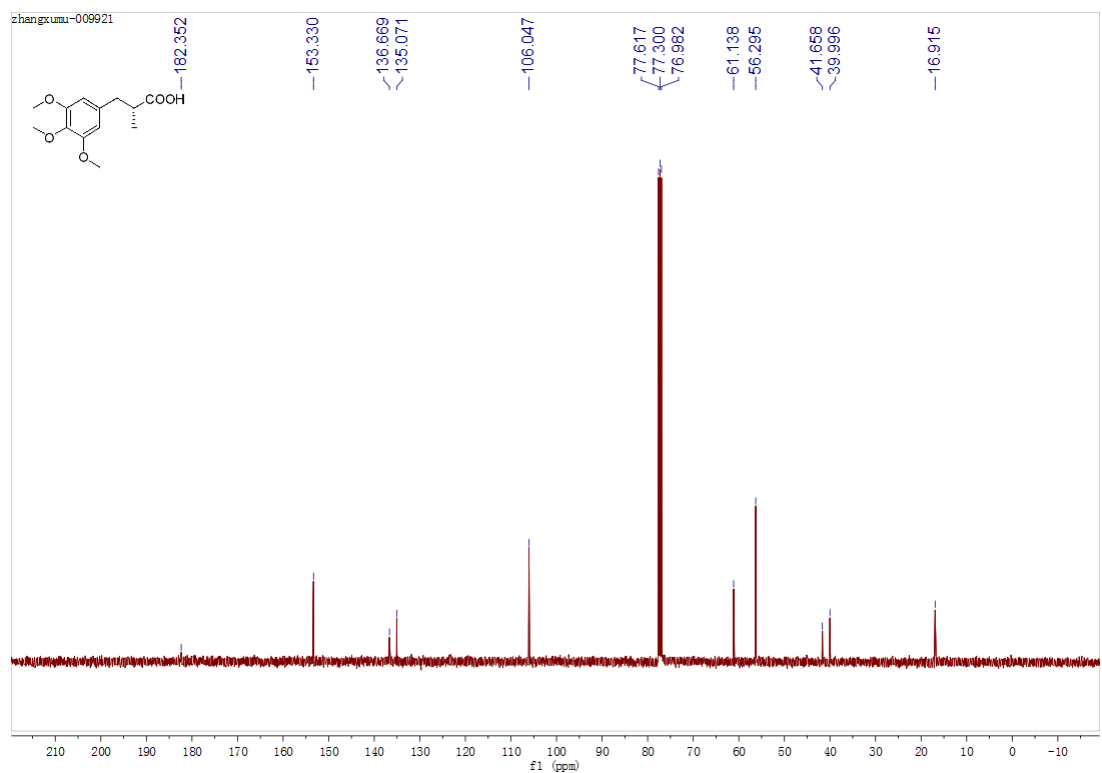

(R)-3-(2-fluorophenyl)-2-methylpropanoic acid **8i**

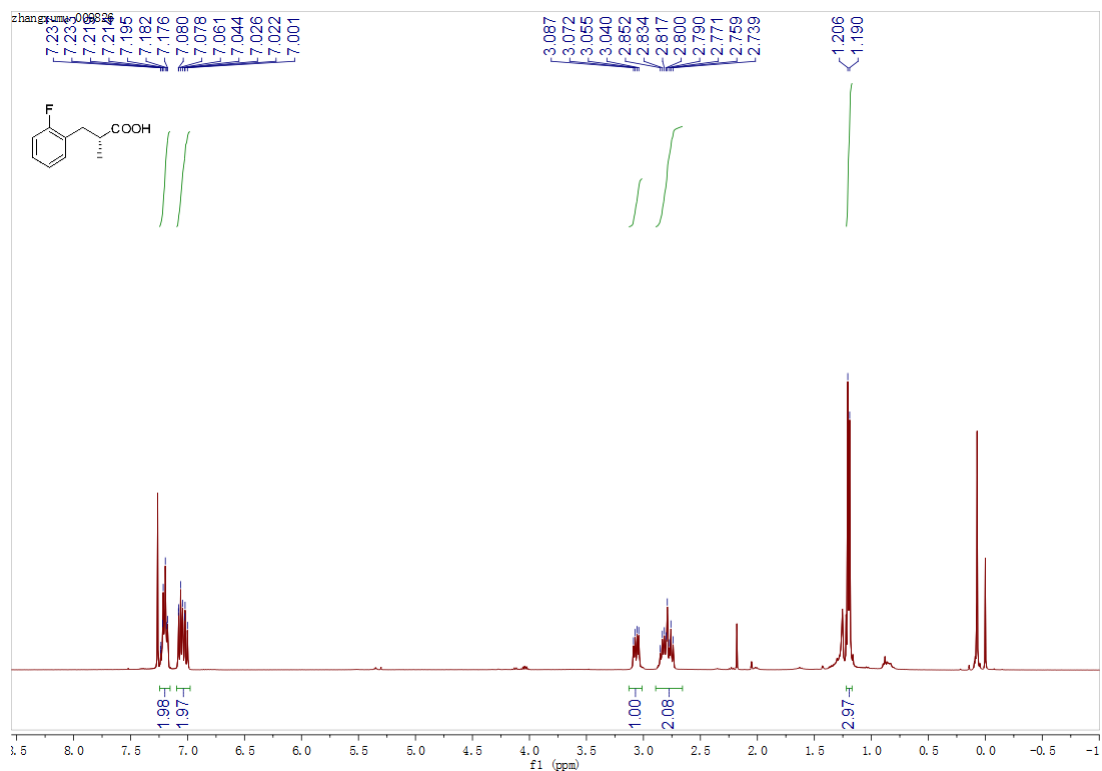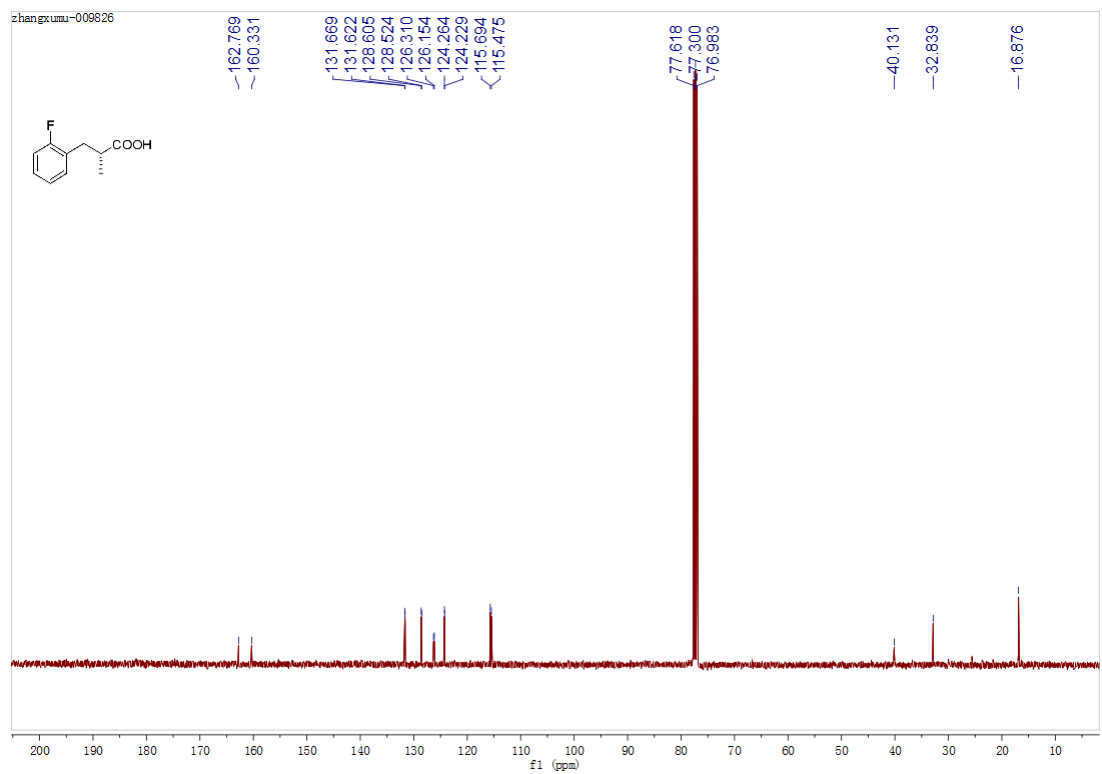

**(R)-3-(3-fluorophenyl)-2-methylpropanoic acid 8j**

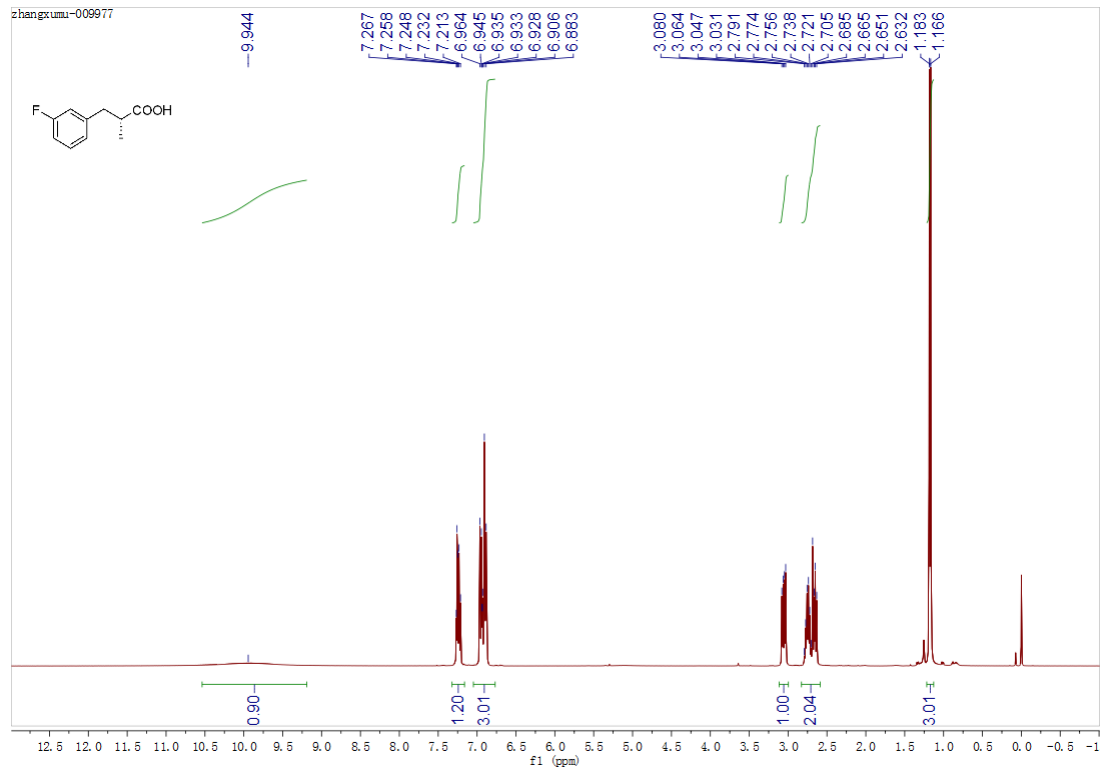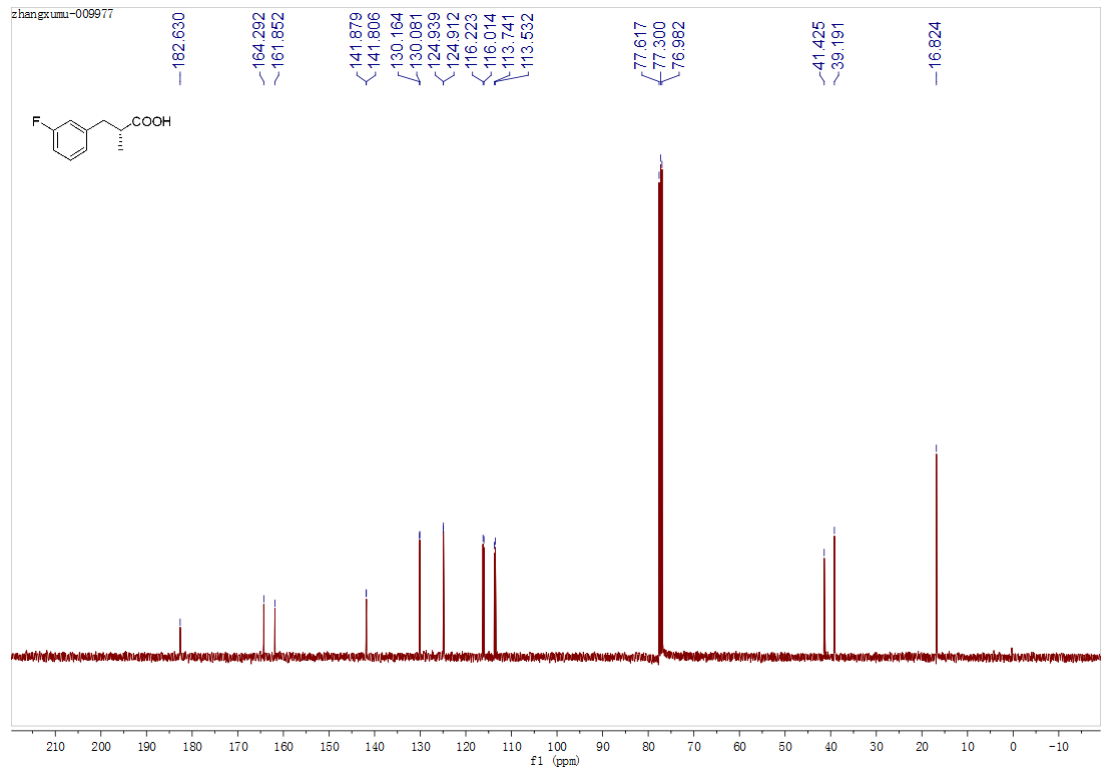

(R)-3-(4-fluorophenyl)-2-methylpropanoic acid **8k**

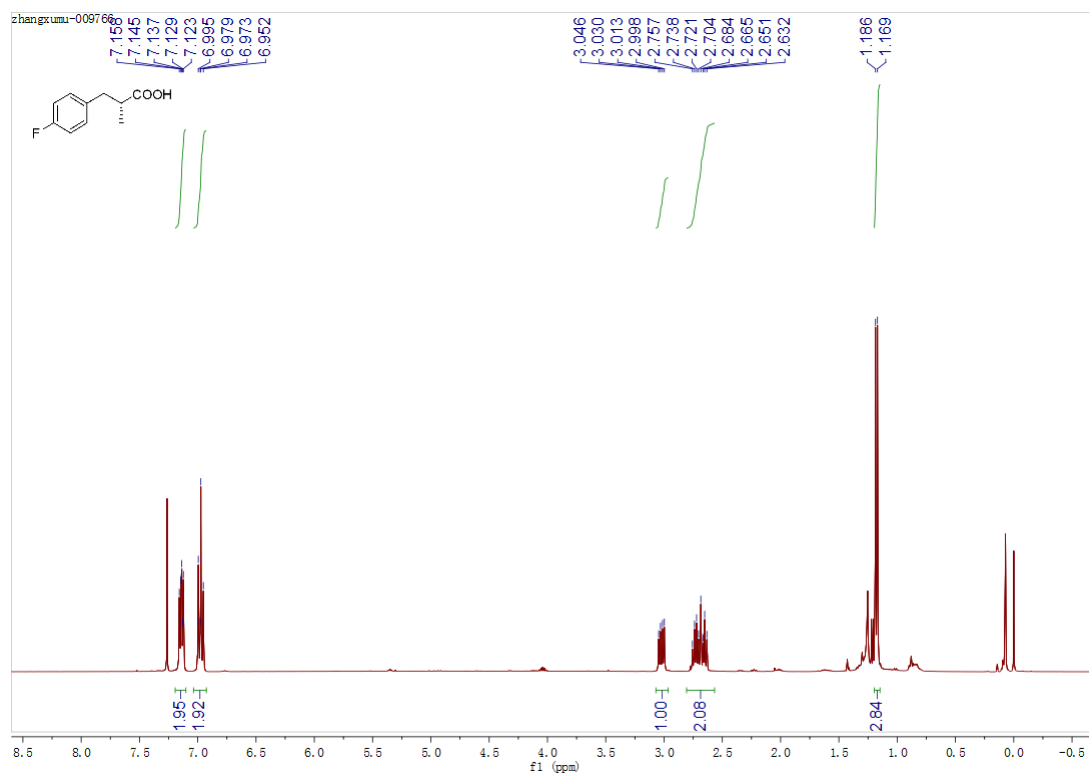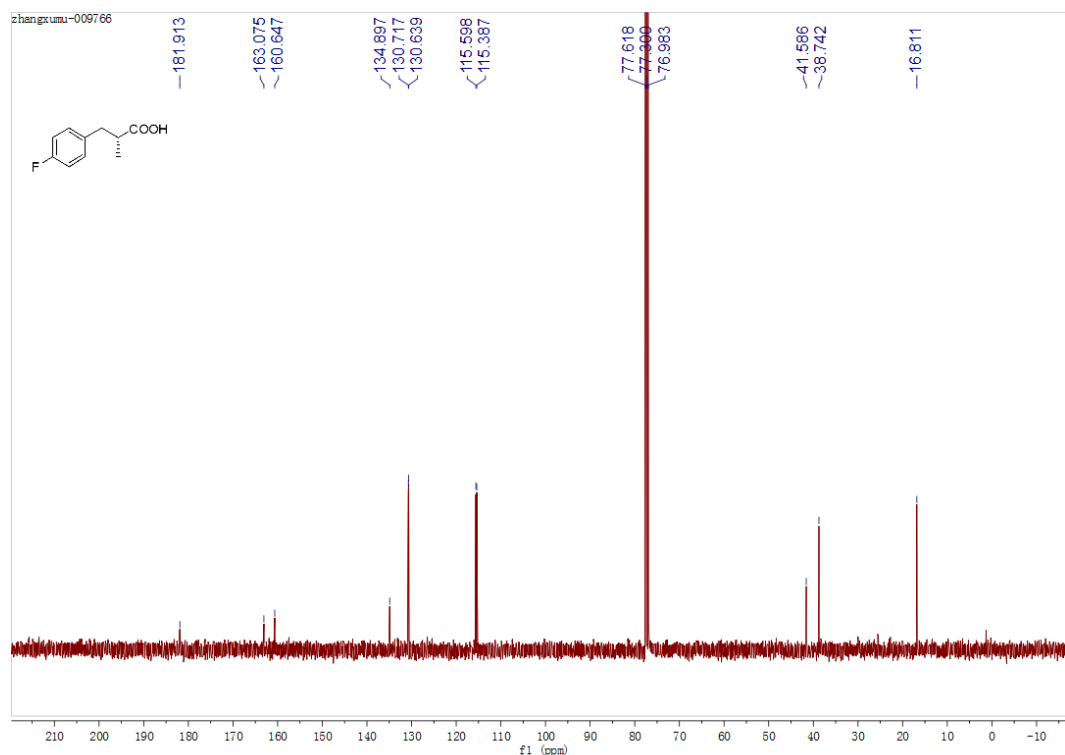

*(R)*-3-(4-chlorophenyl)-2-methylpropanoic acid **8I**

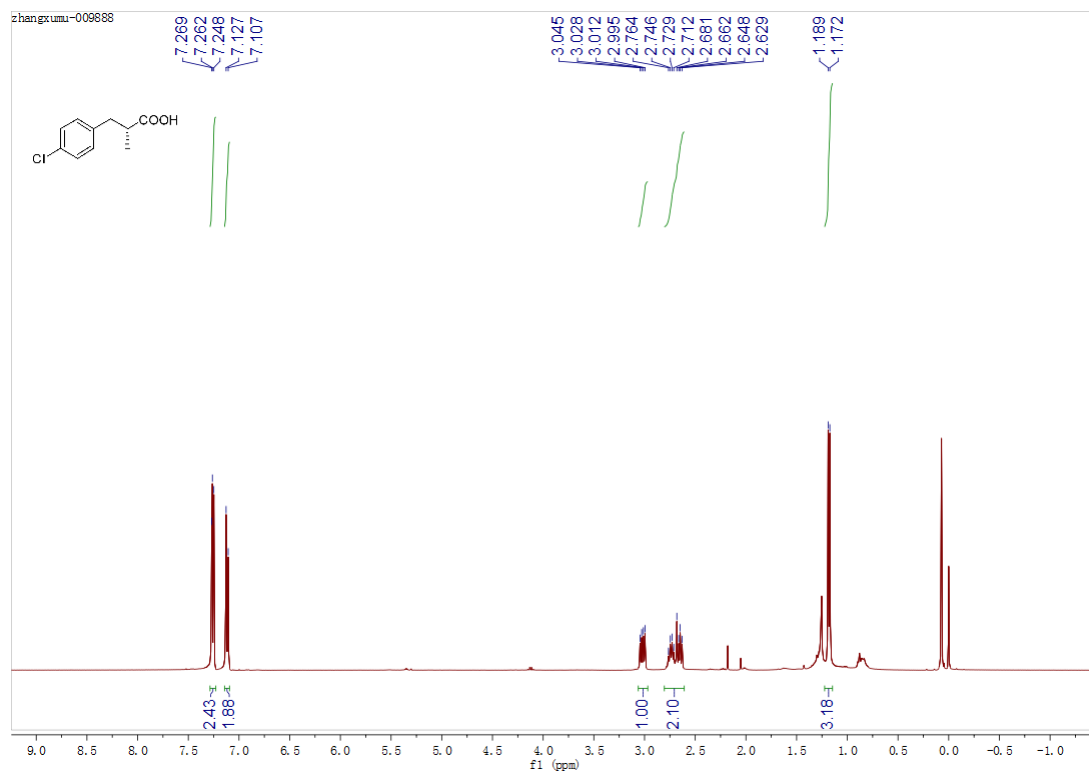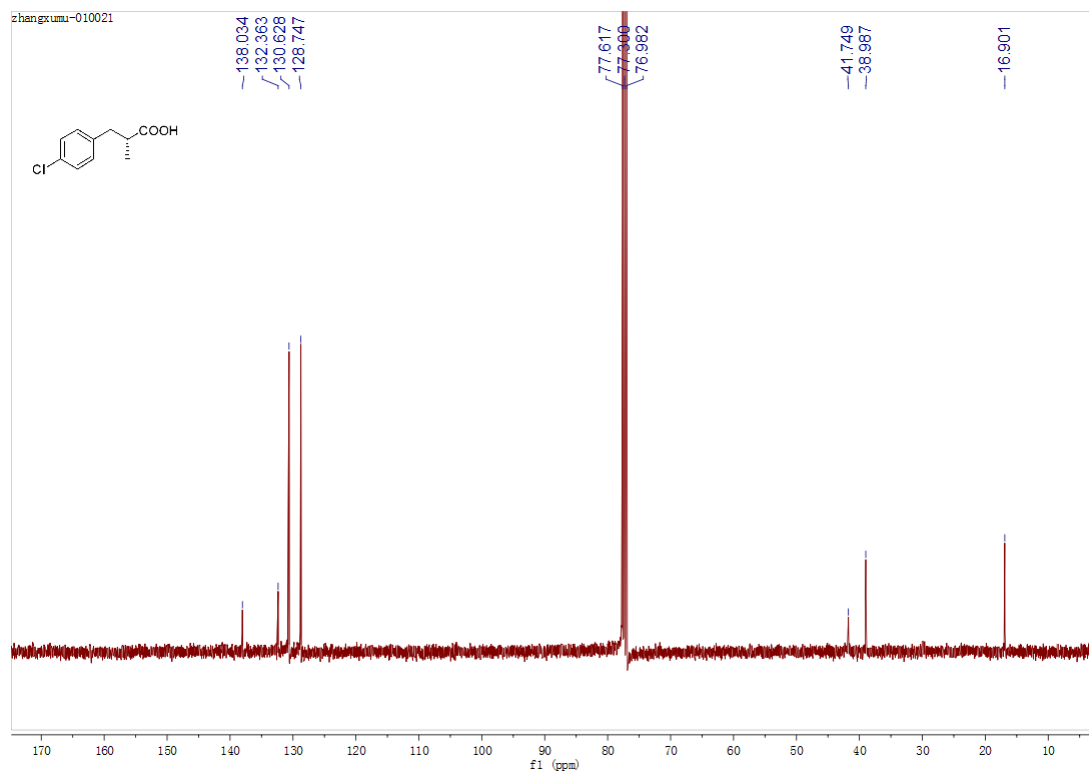

(*R*)-3-(4-bromophenyl)-2-methylpropanoic acid **8m**

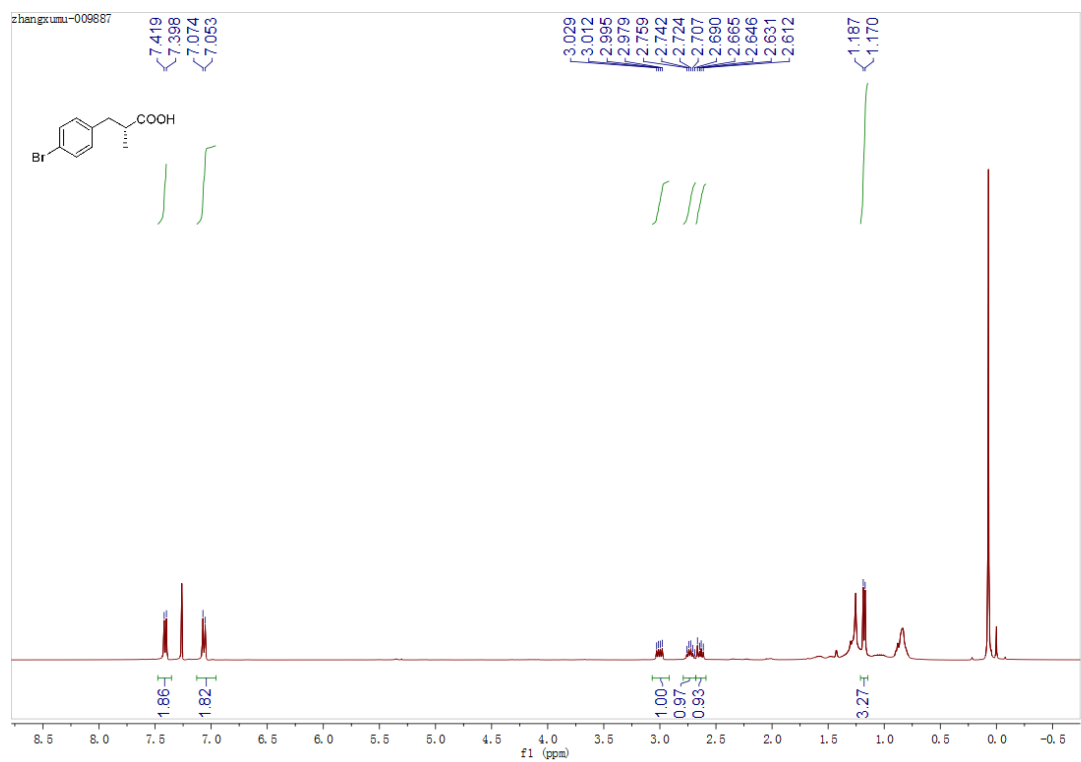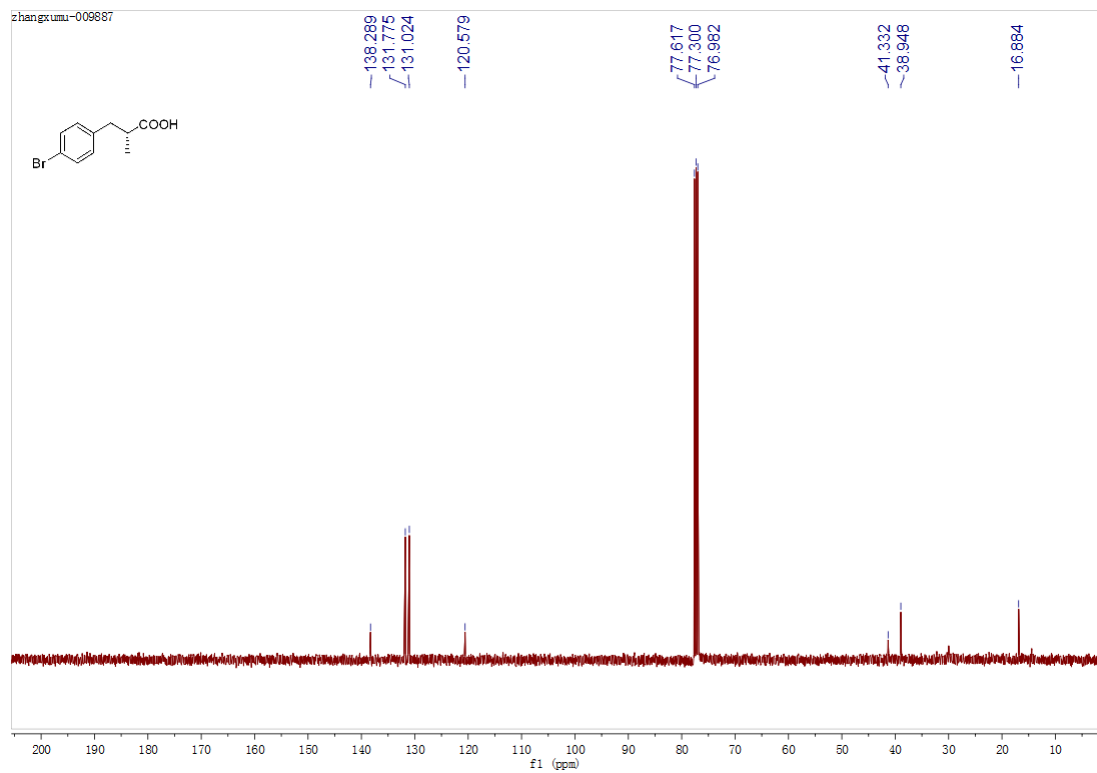

*(R)*-3-(furan-2-yl)-2-methylpropanoic acid **8n**

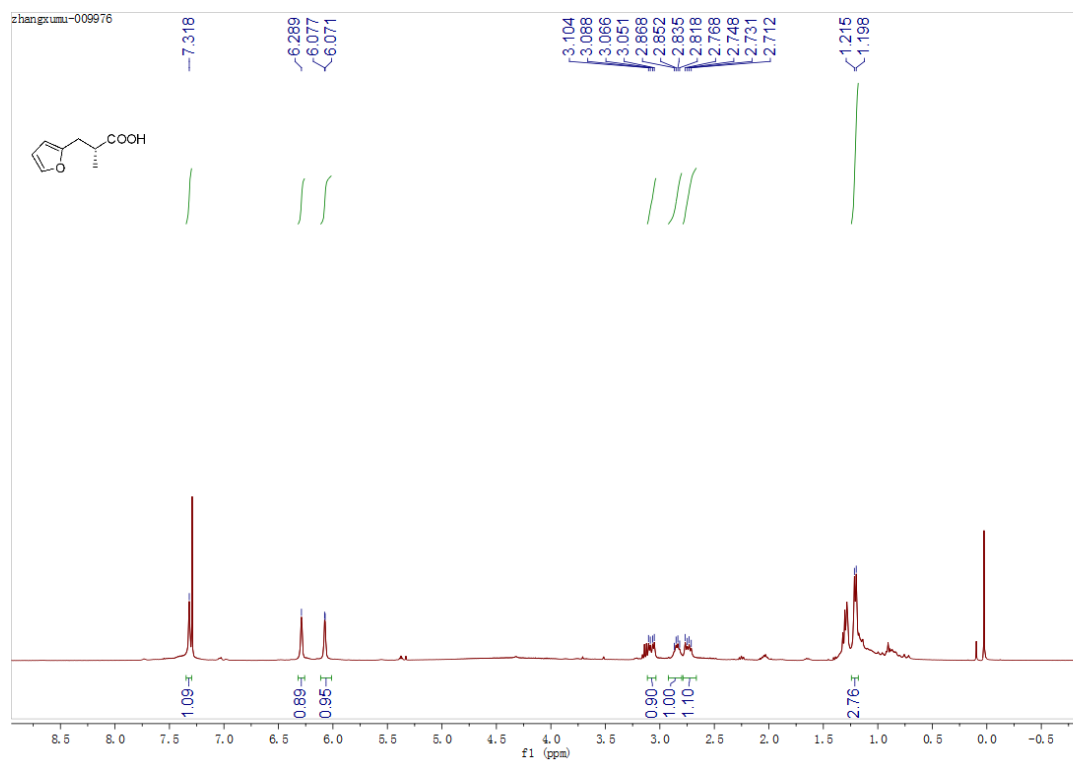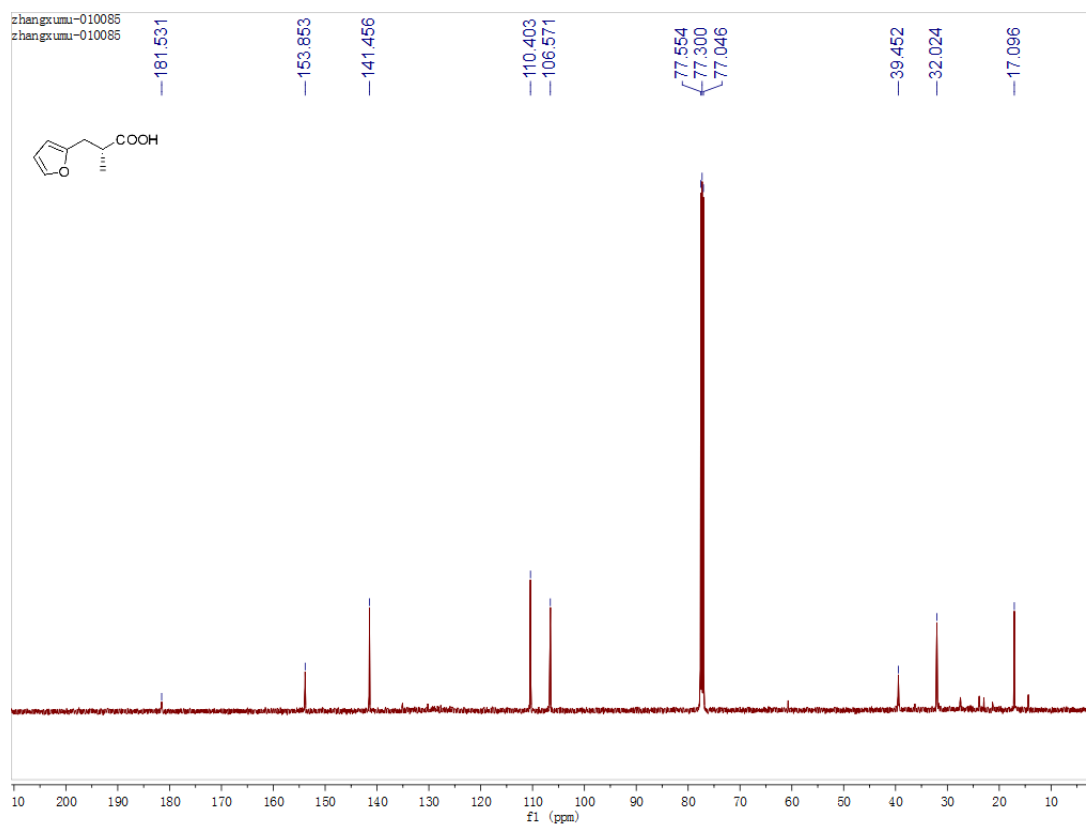

(R)-3-cyclohexyl-2-methylpropanoic acid **8o**

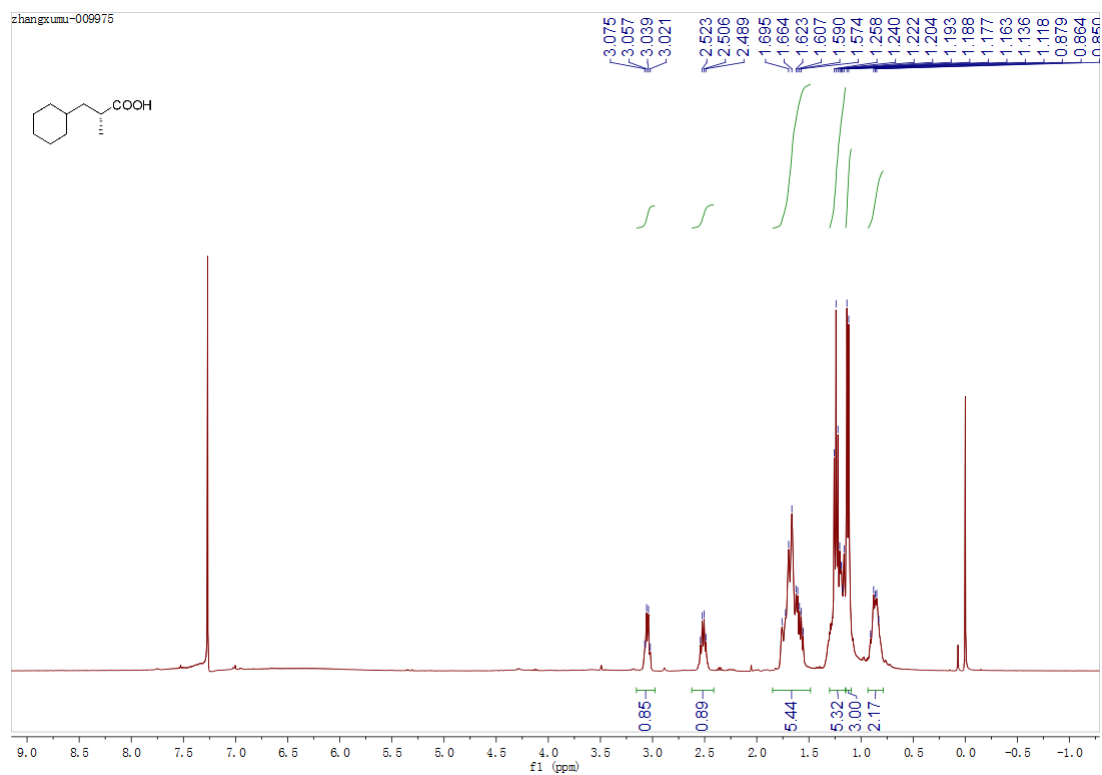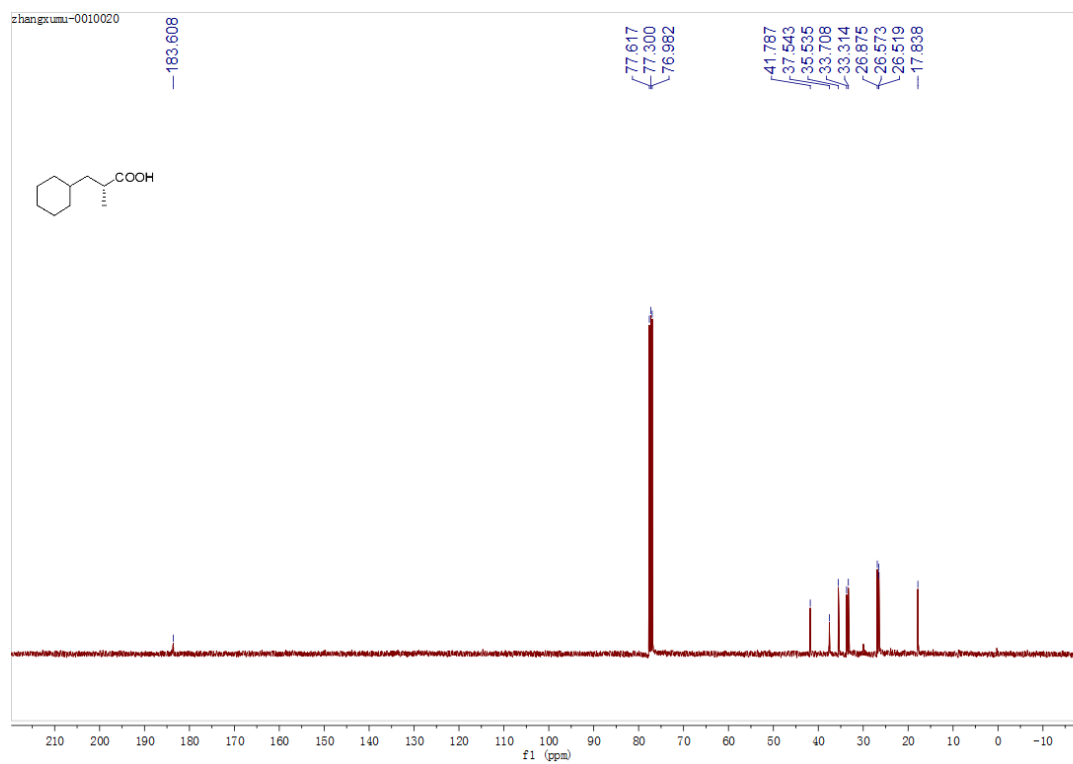



*(R)*-2-benzylbutanoic acid **8p**

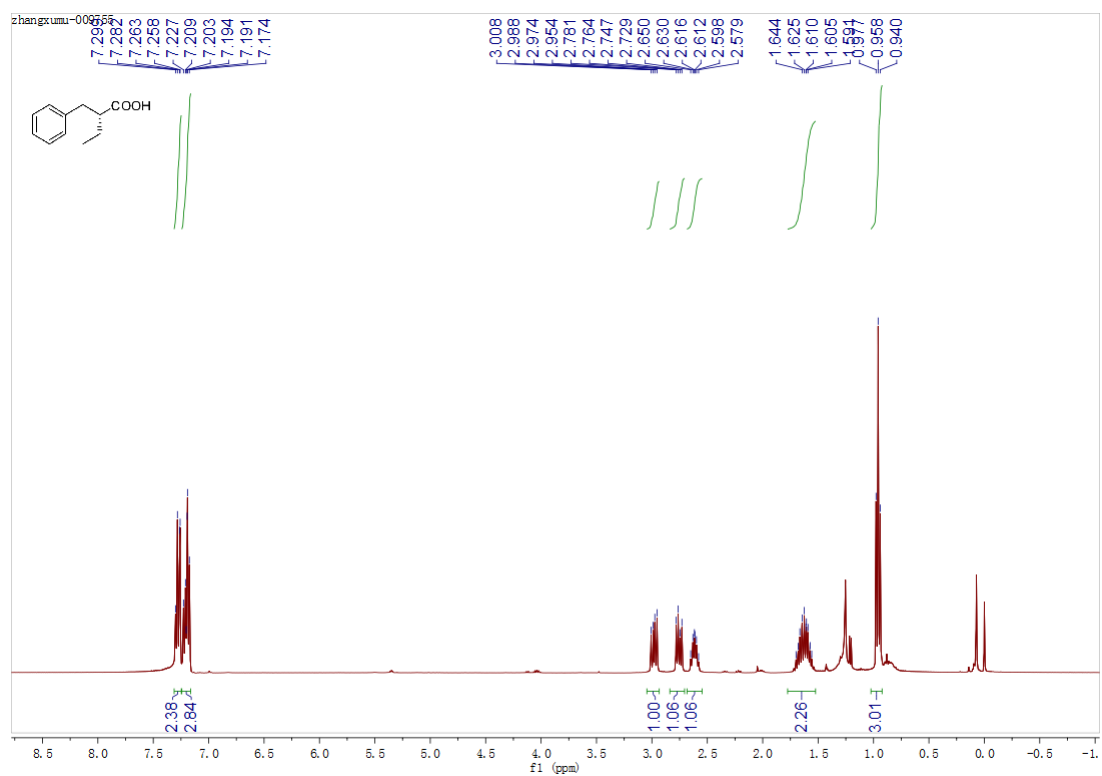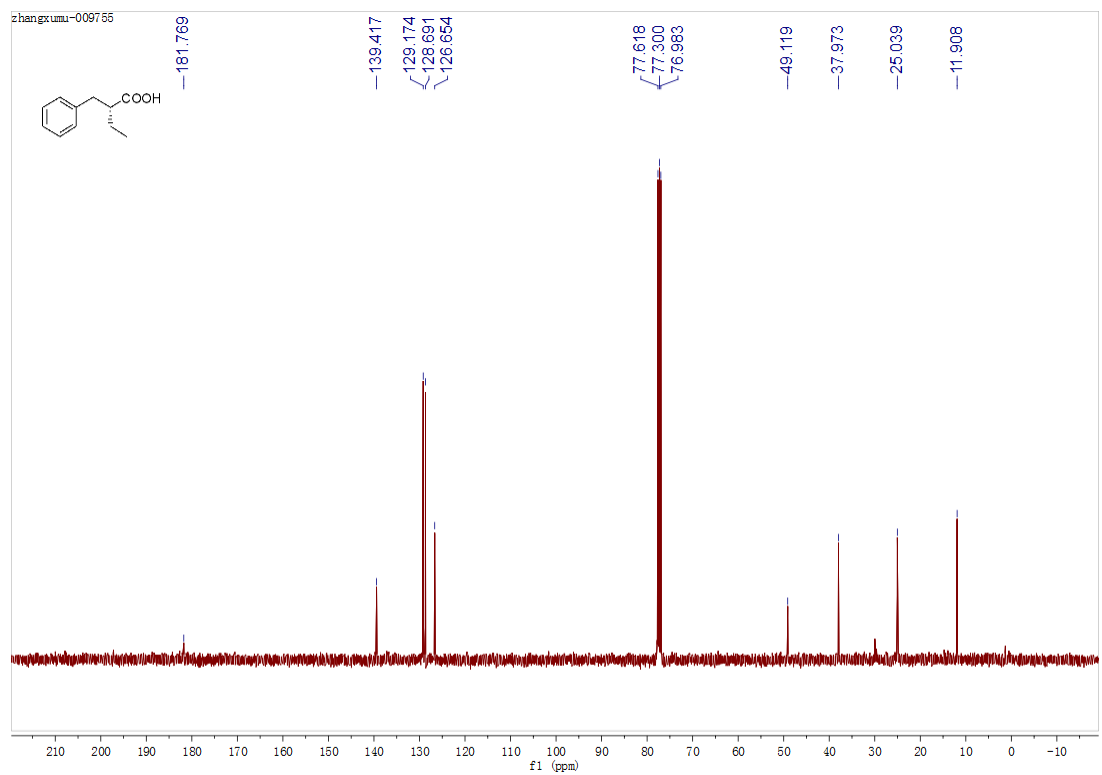

(S)-2-benzyl-3-methylbutanoic acid **8q**

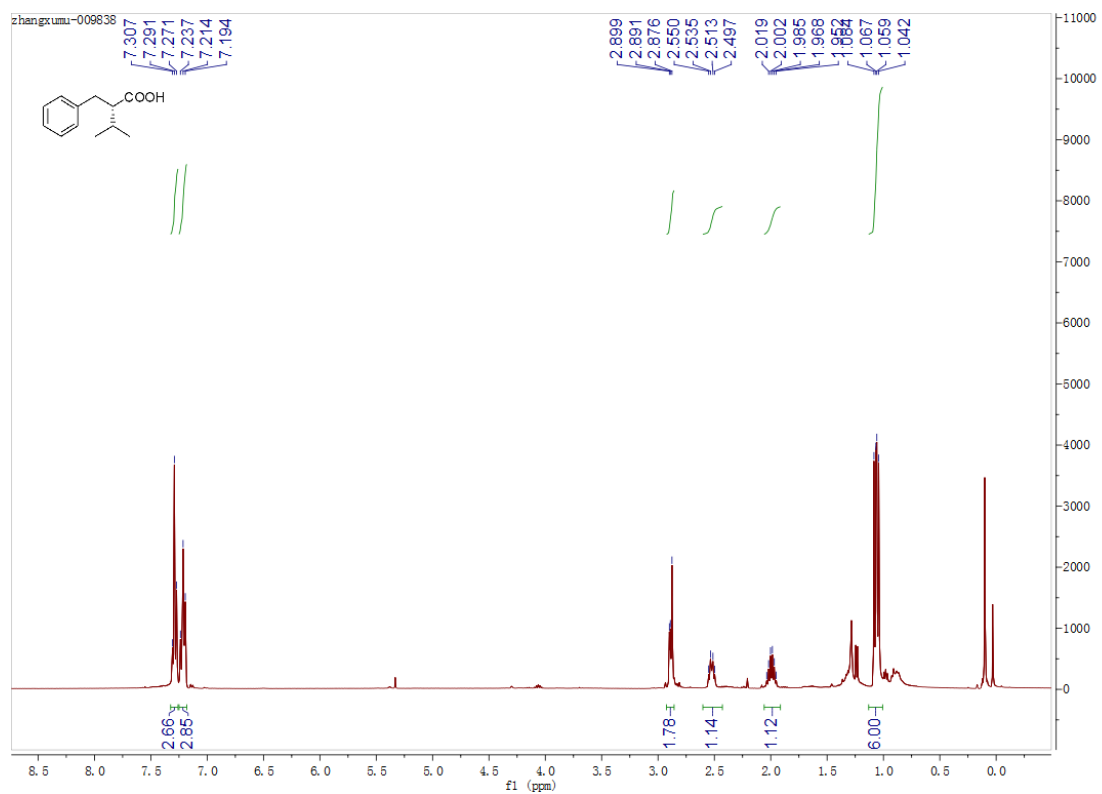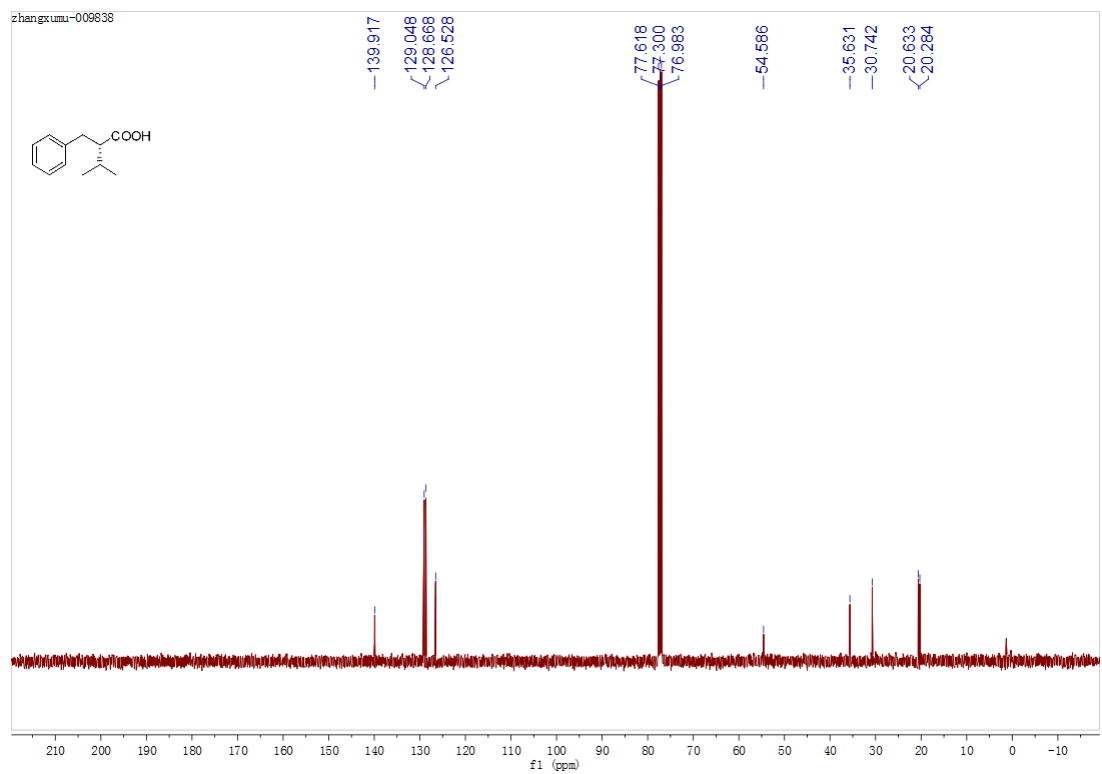

(S)-2,3-diphenylpropanoic acid **8r**

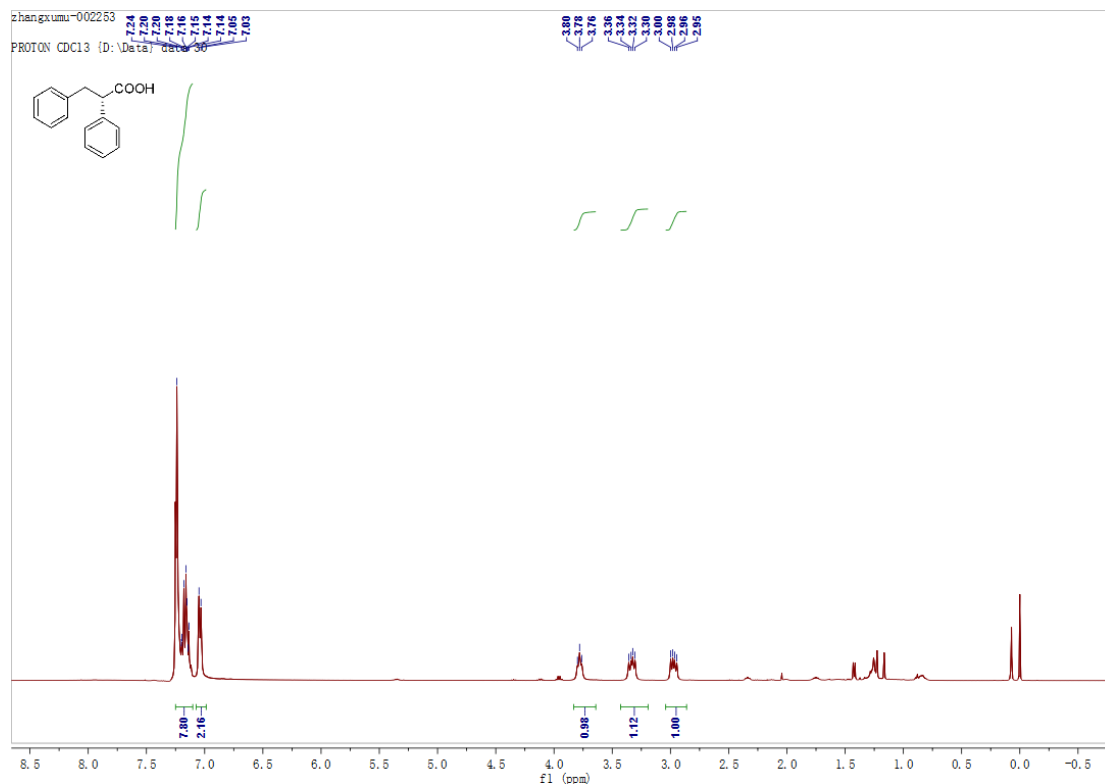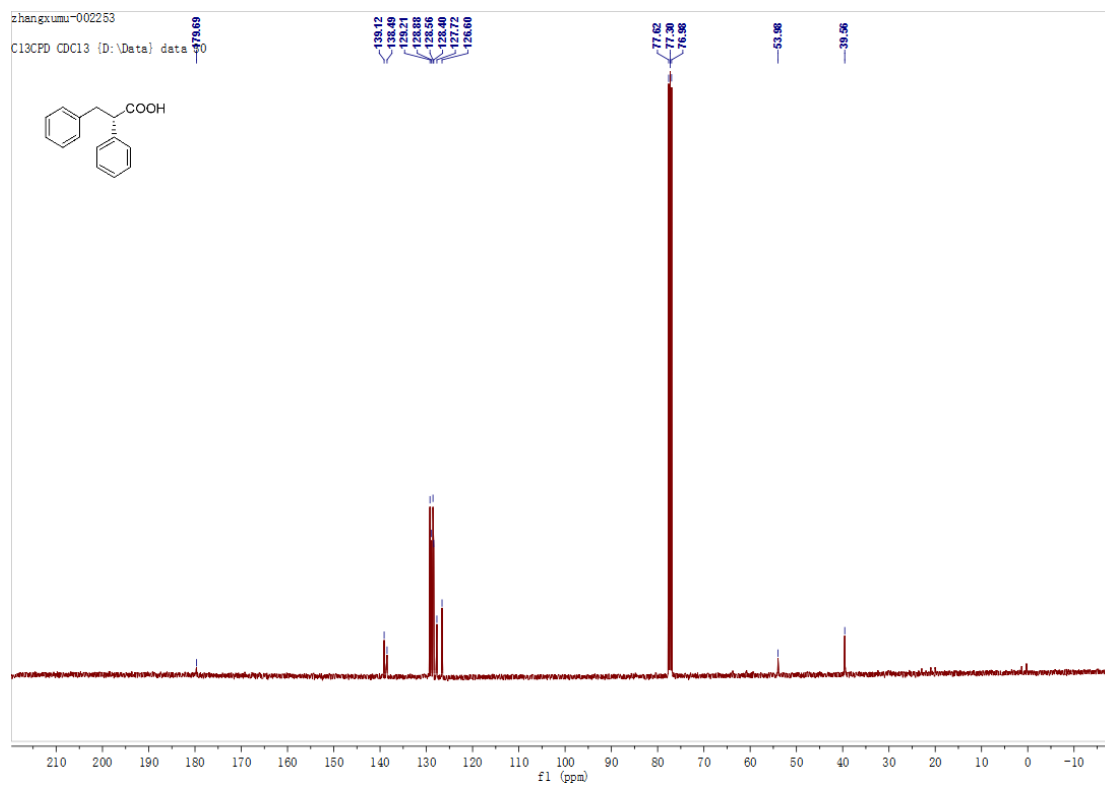

## V. HPLC and GC of hydrogenation product ester derivatives.

### (R)-2-methyl-3-phenylpropanoic acid **8a**

Data File E:\DATA\CCY\CCY-6-133\CCY-6-133 2015-11-28 10-55-00\061-0901.D  
Sample Name: wq-s7-rac

```
=====
Acq. Operator   : SYSTEM                               Seq. Line :    9
Acq. Instrument : 1260HPLC-DAD                         Location  : Vial 61
Injection Date  : 11/28/2015 2:53:43 PM                Inj       :    1
                                                    Inj Volume: 5.000 µl
Acq. Method     : E:\DATA\CCY\CCY-6-133\CCY-6-133 2015-11-28 10-55-00\DAD-OJ(1-6)-99-1-0.5ML-
                  ALL-40MIN.M
Last changed    : 11/28/2015 11:26:43 AM by SYSTEM
Analysis Method : E:\DATA\CCY\CCY-6-133\CCY-6-133 2015-11-28 10-55-00\DAD-OJ(1-6)-99-1-0.5ML-
                  ALL-40MIN.M (Sequence Method)
Last changed    : 5/29/2016 8:03:52 PM by SYSTEM
                  (modified after loading)
Additional Info : Peak(s) manually integrated
=====
```

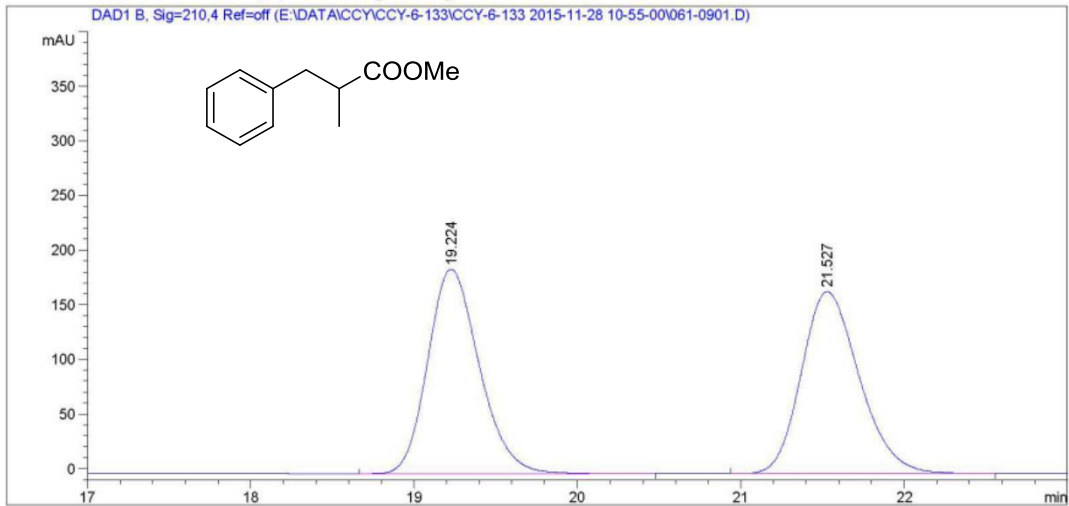

#### Area Percent Report

```
Sorted By      : Signal
Multiplier     : 1.0000
Dilution       : 1.0000
Do not use Multiplier & Dilution Factor with ISTDs
```

Signal 1: DAD1 B, Sig=210,4 Ref=off

| Peak # | RetTime [min] | Type | Width [min] | Area [mAU*s] | Height [mAU] | Area %  |
|--------|---------------|------|-------------|--------------|--------------|---------|
| 1      | 19.224        | BB   | 0.3374      | 4095.74658   | 187.09590    | 50.0797 |
| 2      | 21.527        | BB   | 0.3784      | 4082.70752   | 166.29533    | 49.9203 |

Totals : 8178.45410 353.39124

\*\*\* End of Report \*\*\*

Data File E:\DATA\CCY\CCY-6-133\CCY-6-133 2015-11-28 10-55-00\066-1401.D  
Sample Name: wq-2-42-2

```
=====
Acq. Operator   : SYSTEM                               Seq. Line :   14
Acq. Instrument : 1260HPLC-DAD                       Location  : Vial 66
Injection Date  : 11/28/2015 6:18:23 PM              Inj       :    1
                                                    Inj Volume: 5.000 µl
Acq. Method     : E:\DATA\CCY\CCY-6-133\CCY-6-133 2015-11-28 10-55-00\DAD-OJ(1-6)-99-1-0.5ML-
                  ALL-40MIN.M
Last changed    : 11/28/2015 11:26:43 AM by SYSTEM
Analysis Method : E:\DATA\CCY\CCY-6-133\CCY-6-133 2015-11-28 10-55-00\DAD-OJ(1-6)-99-1-0.5ML-
                  ALL-40MIN.M (Sequence Method)
Last changed    : 5/29/2016 7:59:34 PM by SYSTEM
                  (modified after loading)
Additional Info  : Peak(s) manually integrated
=====
```

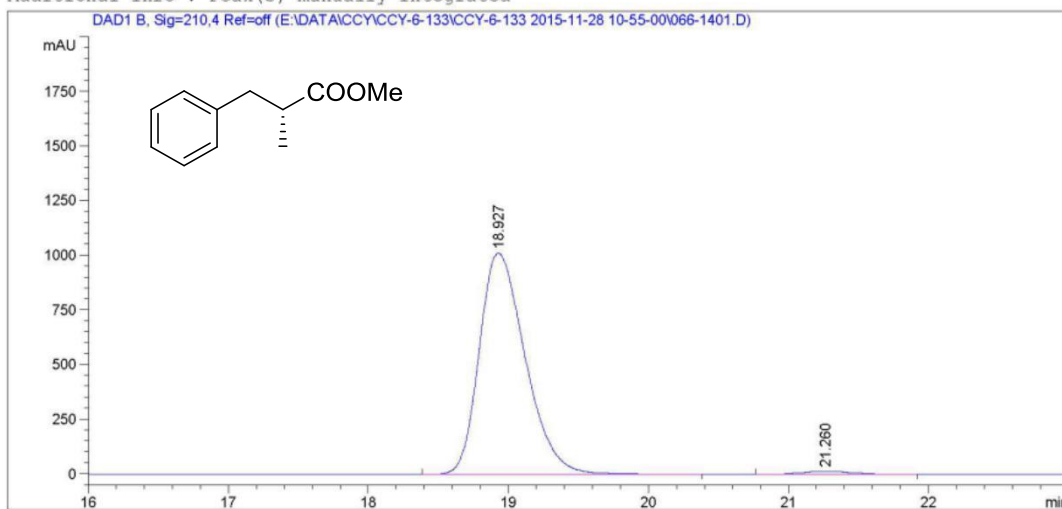

=====  
Area Percent Report  
=====

```
Sorted By      :      Signal
Multiplier     :      1.0000
Dilution       :      1.0000
Do not use Multiplier & Dilution Factor with ISTDs
```

Signal 1: DAD1 B, Sig=210,4 Ref=off

| Peak # | RetTime [min] | Type | Width [min] | Area [mAU*s] | Height [mAU] | Area %  |
|--------|---------------|------|-------------|--------------|--------------|---------|
| 1      | 18.927        | BB   | 0.3525      | 2.29393e4    | 1011.94232   | 98.6494 |
| 2      | 21.260        | BB   | 0.3627      | 314.04916    | 13.14562     | 1.3506  |

Totals :                    2.32533e4 1025.08794

=====  
\*\*\* End of Report \*\*\*

**(R)-2-methyl-3-(o-tolyl)propanoic acid 8b**

Data File E:\DATA\WQ\WQ-2-174\WQ-2-174-2 2016-04-27 20-34-17\021-0201.D  
Sample Name: WQ-2-174-1-RAC

```
=====
Acq. Operator   : SYSTEM                               Seq. Line :    2
Acq. Instrument : 1260HPLC-VWD                       Location  : Vial 21
Injection Date  : 4/27/2016 8:45:53 PM              Inj       :    1
                                                    Inj Volume: 5.000 µl
Acq. Method     : E:\DATA\WQ\WQ-2-174\WQ-2-174-2 2016-04-27 20-34-17\VWD-IB(1-6)-99-1-0.5ML-
                205NM-25MIN.M
Last changed    : 4/27/2016 8:34:17 PM by SYSTEM
Analysis Method : E:\DATA\WQ\WQ-2-174\WQ-2-174-2 2016-04-27 20-34-17\VWD-IB(1-6)-99-1-0.5ML-
                205NM-25MIN.M (Sequence Method)
Last changed    : 5/29/2016 8:38:19 PM by SYSTEM
                (modified after loading)
Additional Info  : Peak(s) manually integrated
=====
```

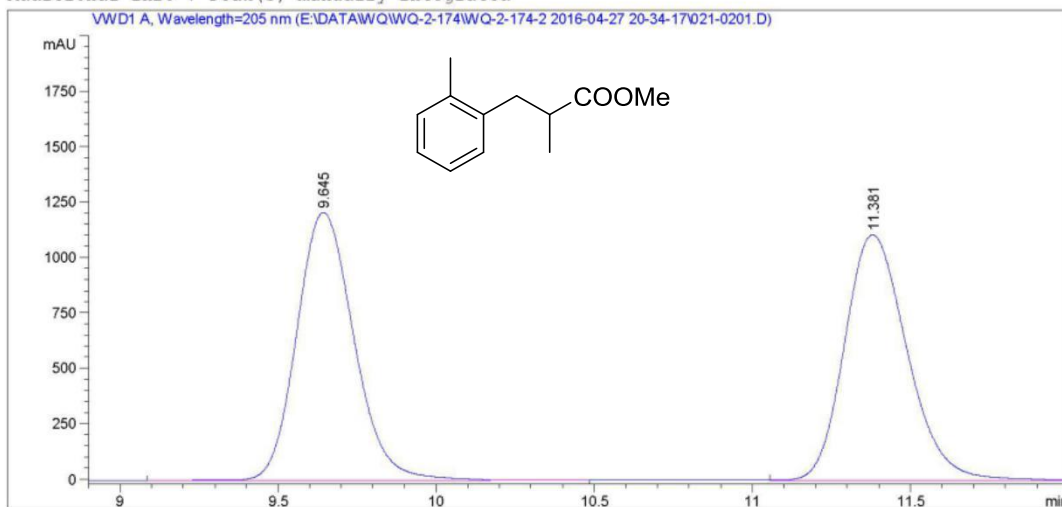

=====  
Area Percent Report  
=====

```
Sorted By      : Signal
Multiplier     : 1.0000
Dilution       : 1.0000
Do not use Multiplier & Dilution Factor with ISTDs
```

Signal 1: VWD1 A, Wavelength=205 nm

| Peak # | RetTime [min] | Type | Width [min] | Area [mAU*s] | Height [mAU] | Area %  |
|--------|---------------|------|-------------|--------------|--------------|---------|
| 1      | 9.645         | BB   | 0.1953      | 1.51485e4    | 1207.81519   | 49.8559 |
| 2      | 11.381        | VB   | 0.2134      | 1.52361e4    | 1108.50342   | 50.1441 |

Totals : 3.03845e4 2316.31860

=====  
\*\*\* End of Report \*\*\*

Data File E:\DATA\WQ\WQ-2-174\WQ-2-174-2 2016-04-27 20-34-17\022-0301.D  
Sample Name: WQ-2-174-1

```
=====
Acq. Operator   : SYSTEM                               Seq. Line :    3
Acq. Instrument : 1260HPLC-VWD                         Location  : Vial 22
Injection Date  : 4/27/2016 9:11:38 PM                 Inj       :    1
                                                    Inj Volume: 5.000 µl
Acq. Method     : E:\DATA\WQ\WQ-2-174\WQ-2-174-2 2016-04-27 20-34-17\VWD-IB(1-6)-99-1-0.5ML-
                205NM-25MIN.M
Last changed    : 4/27/2016 9:27:51 PM by SYSTEM
                (modified after loading)
Analysis Method : E:\DATA\WQ\WQ-2-174\WQ-2-174-2 2016-04-27 20-34-17\VWD-IB(1-6)-99-1-0.5ML-
                205NM-25MIN.M (Sequence Method)
Last changed    : 5/29/2016 8:40:05 PM by SYSTEM
                (modified after loading)
Additional Info : Peak(s) manually integrated
=====
```

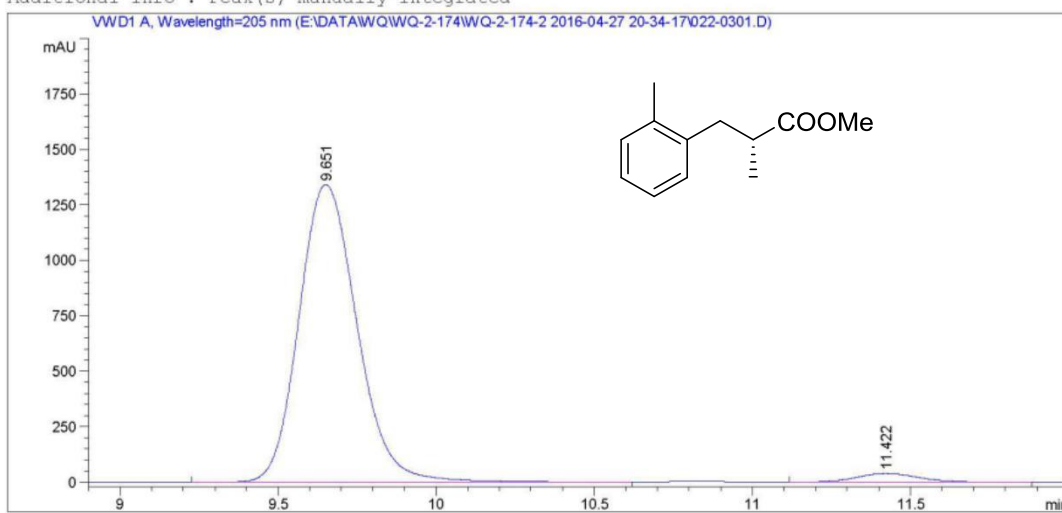

Area Percent Report

```
Sorted By      : Signal
Multiplier     : 1.0000
Dilution       : 1.0000
Do not use Multiplier & Dilution Factor with ISTDs
```

Signal 1: WVD1 A, Wavelength=205 nm

| Peak # | RetTime [min] | Type | Width [min] | Area [mAU*s] | Height [mAU] | Area %  |
|--------|---------------|------|-------------|--------------|--------------|---------|
| 1      | 9.651         | BV   | 0.1982      | 1.70221e4    | 1339.85925   | 97.1191 |
| 2      | 11.422        | VB   | 0.2067      | 504.94086    | 37.83417     | 2.8809  |

Totals : 1.75270e4 1377.69342

# (R)-2-methyl-3-(p-tolyl)propanoic acid **8c**

Data File E:\DATA\WQ\WQ-2-174\DAD-AD-90-10-WFY-2-112 2016-04-27 20-48-16\065-1301.D  
Sample Name: WQ-2-174-9-RAC

```
=====
Acq. Operator   : SYSTEM                               Seq. Line :   13
Acq. Instrument : 1260HPLC-DAD                         Location  : Vial 65
Injection Date  : 4/28/2016 3:21:41 AM                 Inj       :    1
                                                    Inj Volume: 5.000 µl
Acq. Method     : E:\DATA\WQ\WQ-2-174\DAD-AD-90-10-WFY-2-112 2016-04-27 20-48-16\DAD-OJ(1-6)-
99-1-0.5ML-40MIN.M
Last changed    : 4/27/2016 8:49:49 PM by SYSTEM
Analysis Method : E:\DATA\WQ\WQ-2-174\DAD-AD-90-10-WFY-2-112 2016-04-27 20-48-16\DAD-OJ(1-6)-
99-1-0.5ML-40MIN.M (Sequence Method)
Last changed    : 5/29/2016 8:57:54 PM by SYSTEM
                (modified after loading)
Additional Info : Peak(s) manually integrated
=====
```

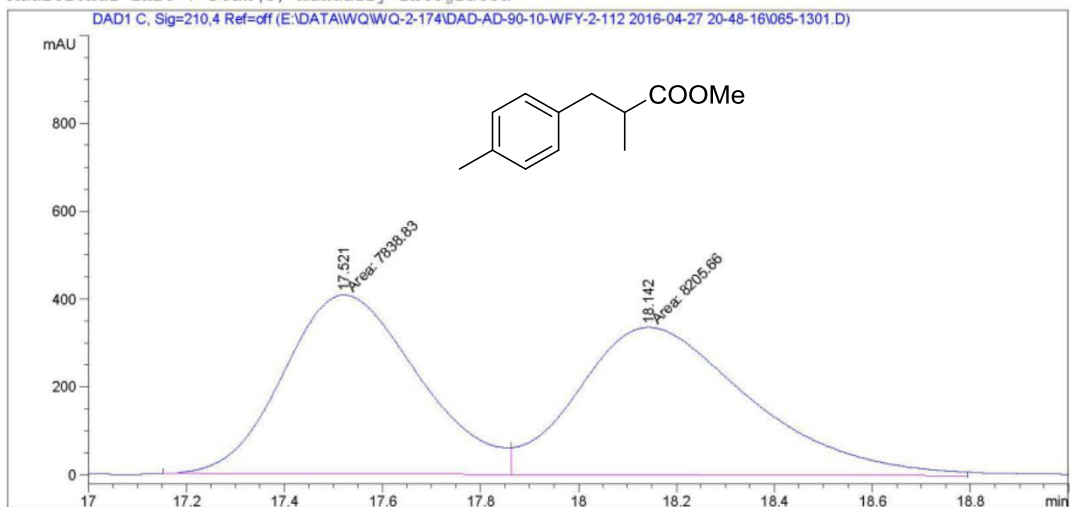

## Area Percent Report

```
Sorted By      : Signal
Multiplier     : 1.0000
Dilution       : 1.0000
Do not use Multiplier & Dilution Factor with ISTDs
```

Signal 1: DAD1 C, Sig=210,4 Ref=off

| Peak # | RetTime [min] | Type | Width [min] | Area [mAU*s] | Height [mAU] | Area %  |
|--------|---------------|------|-------------|--------------|--------------|---------|
| 1      | 17.521        | MF   | 0.3205      | 7838.83350   | 407.65817    | 48.8569 |
| 2      | 18.142        | FM   | 0.4079      | 8205.65820   | 335.30875    | 51.1431 |

Totals : 1.60445e4 742.96692

\*\*\* End of Report \*\*\*



```

=====
Acq. Operator   : SYSTEM                      Seq. Line :   14
Acq. Instrument : 1260HPLC-DAD                 Location  : Vial 66
Injection Date  : 4/28/2016 4:02:39 AM        Inj       :    1
                                                    Inj Volume: 5.000 µl
Acq. Method     : E:\DATA\WQ\WQ-2-174\DAD-AD-90-10-WFY-2-112 2016-04-27 20-48-16\DAD-OJ(1-6)-
                    99-1-0.5ML-40MIN.M
Last changed    : 4/27/2016 8:49:49 PM by SYSTEM
Analysis Method : E:\DATA\WQ\WQ-2-174\DAD-AD-90-10-WFY-2-112 2016-04-27 20-48-16\DAD-OJ(1-6)-
                    99-1-0.5ML-40MIN.M (Sequence Method)
Last changed    : 5/29/2016 9:03:22 PM by SYSTEM
                    (modified after loading)
Additional Info : Peak(s) manually integrated

```

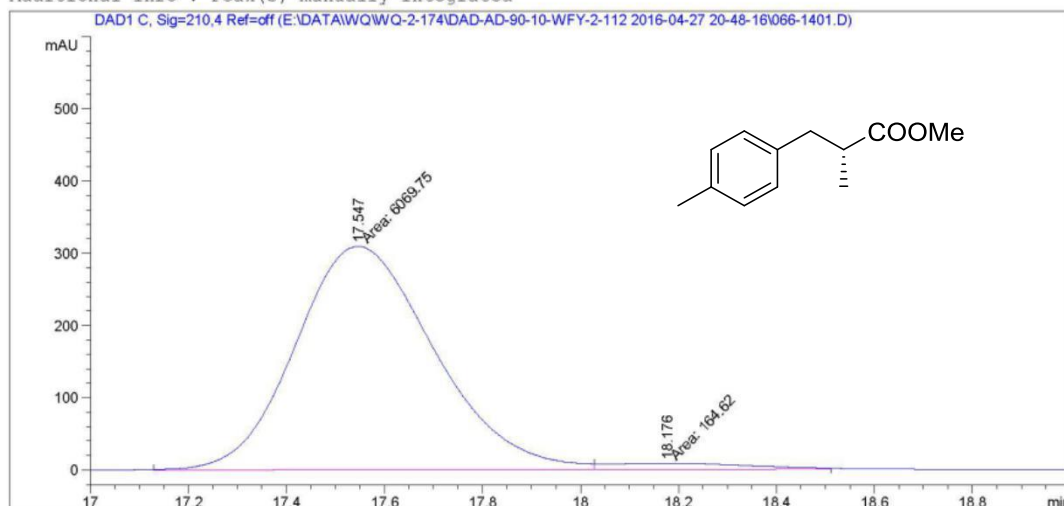

=====  
Area Percent Report  
=====

Sorted By : Signal  
Multiplier : 1.0000  
Dilution : 1.0000  
Do not use Multiplier & Dilution Factor with ISTDs

Signal 1: DAD1 C, Sig=210,4 Ref=off

| Peak # | RetTime [min] | Type | Width [min] | Area [mAU*s] | Height [mAU] | Area %  |
|--------|---------------|------|-------------|--------------|--------------|---------|
| 1      | 17.547        | MF   | 0.3273      | 6069.75488   | 309.09094    | 97.3595 |
| 2      | 18.176        | FM   | 0.3345      | 164.61998    | 8.20196      | 2.6405  |

Totals : 6234.37486 317.29291

=====  
\*\*\* End of Report \*\*\*

*(R)*-3-(3,4-dimethylphenyl)-2-methylpropanoic acid **8d**

Data File E:\DATA\WQ\WQ-2-182\WQ-2-182 2016-05-07 12-26-34\003-0401.D  
Sample Name: WQ-2-182-4-RAC

=====

|                                      |                       |
|--------------------------------------|-----------------------|
| Acq. Operator : SYSTEM               | Seq. Line : 4         |
| Acq. Instrument : 1260HPLC-DAD       | Location : Vial 3     |
| Injection Date : 5/7/2016 2:22:15 PM | Inj : 1               |
|                                      | Inj Volume : 3.000 µl |

Acq. Method : E:\DATA\WQ\WQ-2-182\WQ-2-182 2016-05-07 12-26-34\DAD-OD(1-2)-99-1-0.5ML-3UL-50MIN.M

Last changed : 5/7/2016 3:06:01 PM by SYSTEM  
(modified after loading)

Analysis Method : E:\DATA\WQ\WQ-2-182\WQ-2-182 2016-05-07 12-26-34\DAD-OD(1-2)-99-1-0.5ML-3UL-50MIN.M (Sequence Method)

Last changed : 5/29/2016 9:11:23 PM by SYSTEM  
(modified after loading)

Additional Info : Peak(s) manually integrated

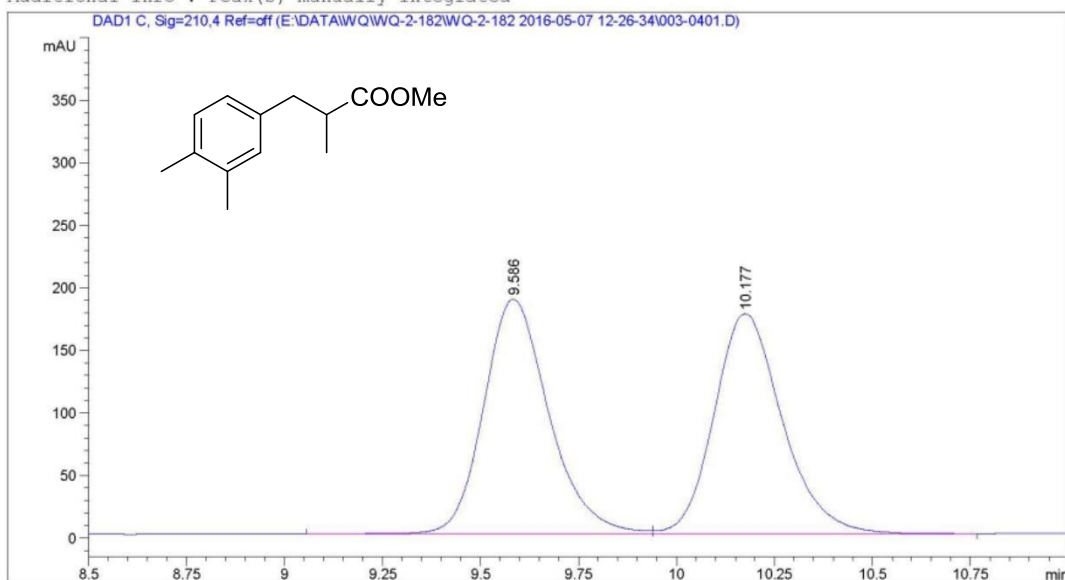

=====  
Area Percent Report  
=====

Sorted By : Signal  
Multiplier : 1.0000  
Dilution : 1.0000  
Use Multiplier & Dilution Factor with ISTDs

Signal 1: DAD1 C, Sig=210,4 Ref=off

| Peak # | RetTime [min] | Type | Width [min] | Area [mAU*s] | Height [mAU] | Area %  |
|--------|---------------|------|-------------|--------------|--------------|---------|
| 1      | 9.586         | BV   | 0.1750      | 2173.64331   | 187.85251    | 50.5599 |
| 2      | 10.177        | VB   | 0.1847      | 2125.50244   | 176.19662    | 49.4401 |

Totals : 4299.14575 364.04913

```

=====
Acq. Operator   : SYSTEM                               Seq. Line :    5
Acq. Instrument : 1260HPLC-DAD                          Location  : Vial 4
Injection Date  : 5/7/2016 3:06:55 PM                   Inj       :    1
                                                    Inj Volume: 3.000 µl
Acq. Method     : E:\DATA\WQ\WQ-2-182\WQ-2-182 2016-05-07 12-26-34\DAD-OD(1-2)-99-1-0.5ML-3UL
                  -50MIN.M
Last changed    : 5/7/2016 3:09:56 PM by SYSTEM
                  (modified after loading)
Analysis Method : E:\DATA\WQ\WQ-2-182\WQ-2-182 2016-05-07 12-26-34\DAD-OD(1-2)-99-1-0.5ML-3UL
                  -50MIN.M (Sequence Method)
Last changed    : 5/29/2016 9:12:29 PM by SYSTEM
                  (modified after loading)
Additional Info  : Peak(s) manually integrated
  
```

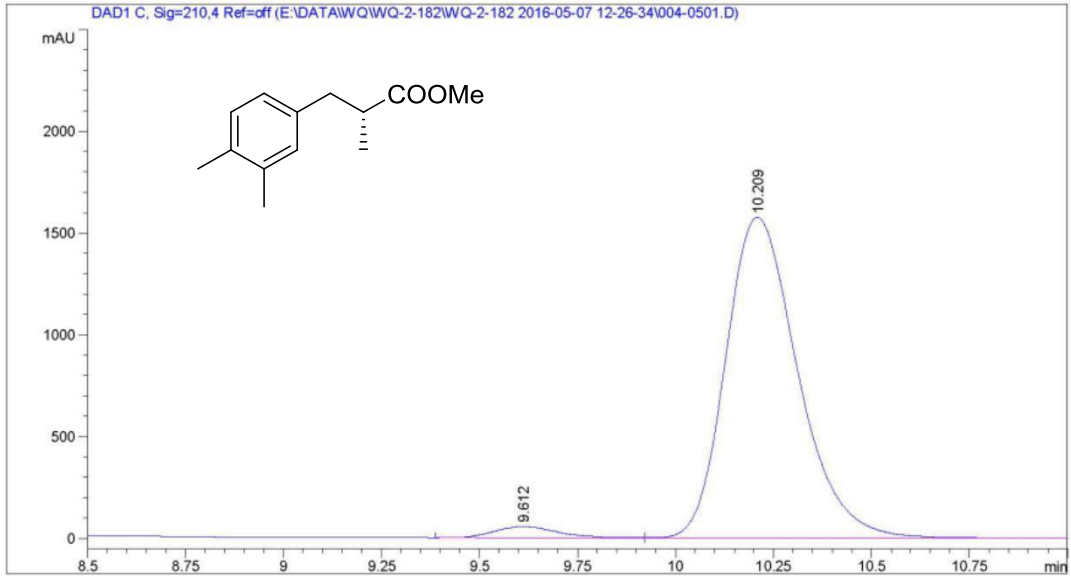

Area Percent Report

```

Sorted By      : Signal
Multiplier     : 1.0000
Dilution      : 1.0000
Use Multiplier & Dilution Factor with ISTDs
  
```

Signal 1: DAD1 C, Sig=210,4 Ref=off

| Peak # | RetTime [min] | Type | Width [min] | Area [mAU*s] | Height [mAU] | Area %  |
|--------|---------------|------|-------------|--------------|--------------|---------|
| 1      | 9.612         | BV   | 0.1728      | 628.67419    | 55.23700     | 3.0329  |
| 2      | 10.209        | VB   | 0.1969      | 2.00997e4    | 1575.29175   | 96.9671 |

Totals : 2.07284e4 1630.52874



```

=====
Acq. Operator   : SYSTEM                               Seq. Line :    3
Acq. Instrument : 1260HPLC-DAD                       Location  : Vial 2
Injection Date  : 5/7/2016 1:31:22 PM                Inj       :    1
                                                    Inj Volume: 3.000 µl

Acq. Method     : E:\DATA\WQ\WQ-2-182\WQ-2-182 2016-05-07 12-26-34\
                  DAD-OD(1-2)-99-1-0.5ML-3UL
                  -50MIN.M
Last changed    : 5/7/2016 12:26:35 PM by SYSTEM
Analysis Method : E:\DATA\WQ\WQ-2-182\WQ-2-182 2016-05-07 12-26-34\
                  DAD-OD(1-2)-99-1-0.5ML-3UL
                  -50MIN.M (Sequence Method)
Last changed    : 5/29/2016 9:08:50 PM by SYSTEM
                  (modified after loading)
Additional Info : Peak(s) manually integrated
  
```

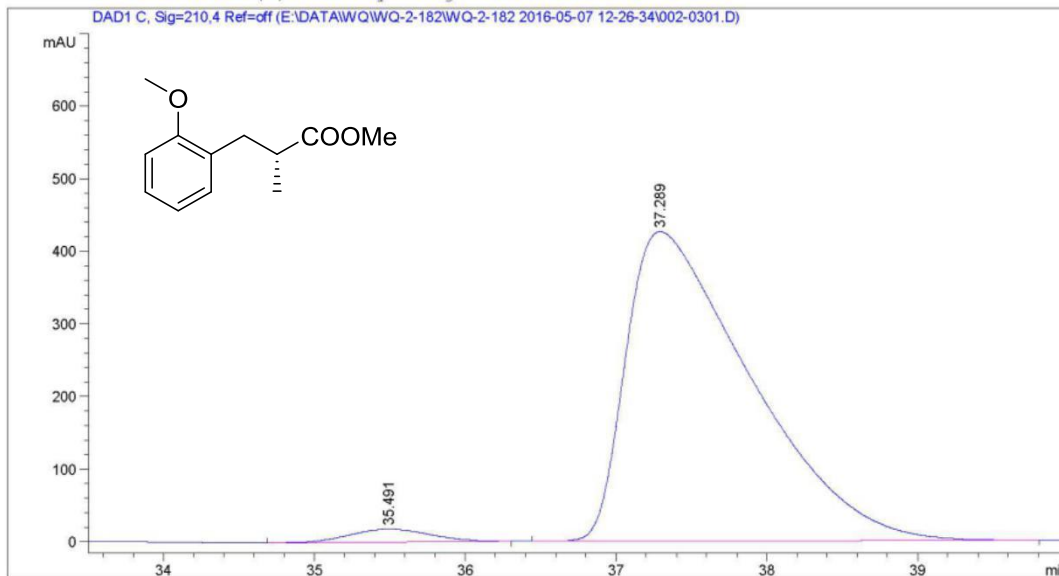

Area Percent Report

```

Sorted By      : Signal
Multiplier     : 1.0000
Dilution       : 1.0000
Use Multiplier & Dilution Factor with ISTDs
  
```

Signal 1: DAD1 C, Sig=210,4 Ref=off

| Peak #   | RetTime [min] | Type | Width [min] | Area [mAU*s] | Height [mAU] | Area %  |
|----------|---------------|------|-------------|--------------|--------------|---------|
| 1        | 35.491        | BB   | 0.5739      | 648.52295    | 17.76537     | 2.5904  |
| 2        | 37.289        | BB   | 0.8401      | 2.43871e4    | 425.84824    | 97.4096 |
| Totals : |               |      |             | 2.50356e4    | 443.61360    |         |

**(R)-3-(3-methoxyphenyl)-2-methylpropanoic acid 8f**

Data File E:\DATA\GWC\GWC16-4\S-SOLVENT 2016-04-23 22-28-47\053-0401.D  
Sample Name: WQ-2-172-2-RAC

```
=====
Acq. Operator   : SYSTEM                               Seq. Line :    4
Acq. Instrument : 1260HPLC-DAD                        Location  : Vial 53
Injection Date  : 4/23/2016 11:42:40 PM              Inj       :    1
                                                    Inj Volume: 5.000 µl
Acq. Method     : E:\DATA\GWC\GWC16-4\S-SOLVENT 2016-04-23 22-28-47\DAD-OJ(1-6)-99-1-0.5ML-
                210NM--30MIN.M
Last changed    : 4/23/2016 10:28:48 PM by SYSTEM
Analysis Method : E:\DATA\GWC\GWC16-4\S-SOLVENT 2016-04-23 22-28-47\DAD-OJ(1-6)-99-1-0.5ML-
                210NM--30MIN.M (Sequence Method)
Last changed    : 5/29/2016 8:51:24 PM by SYSTEM
                (modified after loading)
Additional Info : Peak(s) manually integrated
=====
```

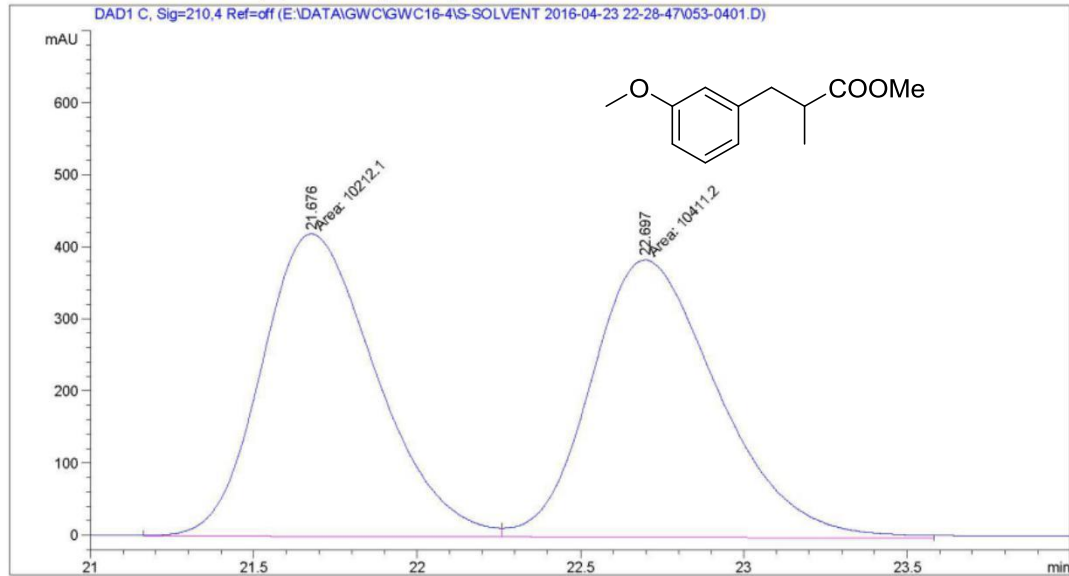

Area Percent Report

```
Sorted By      : Signal
Multiplier     : 1.0000
Dilution       : 1.0000
Use Multiplier & Dilution Factor with ISTDs
```

Signal 1: DAD1 C, Sig=210,4 Ref=off

| Peak # | RetTime [min] | Type | Width [min] | Area [mAU*s] | Height [mAU] | Area %  |
|--------|---------------|------|-------------|--------------|--------------|---------|
| 1      | 21.676        | MF   | 0.4058      | 1.02121e4    | 419.39774    | 49.5173 |
| 2      | 22.697        | FM   | 0.4513      | 1.04112e4    | 384.49316    | 50.4827 |

Totals : 2.06234e4 803.89090

=====

|                 |                         |            |            |
|-----------------|-------------------------|------------|------------|
| Acq. Operator   | : SYSTEM                | Seq. Line  | : 5        |
| Acq. Instrument | : 1260HPLC-DAD          | Location   | : Vial 54  |
| Injection Date  | : 4/24/2016 12:13:37 AM | Inj        | : 1        |
|                 |                         | Inj Volume | : 5.000 µl |

Acq. Method : E:\DATA\GWC\GWC16-4\S-SOLVENT 2016-04-23 22-28-47\DAD-OJ(1-6)-99-1-0.5ML-210NM--30MIN.M  
Last changed : 4/23/2016 10:28:48 PM by SYSTEM  
Analysis Method : E:\DATA\GWC\GWC16-4\S-SOLVENT 2016-04-23 22-28-47\DAD-OJ(1-6)-99-1-0.5ML-210NM--30MIN.M (Sequence Method)  
Last changed : 5/29/2016 8:53:34 PM by SYSTEM  
(modified after loading)

Additional Info : Peak(s) manually integrated

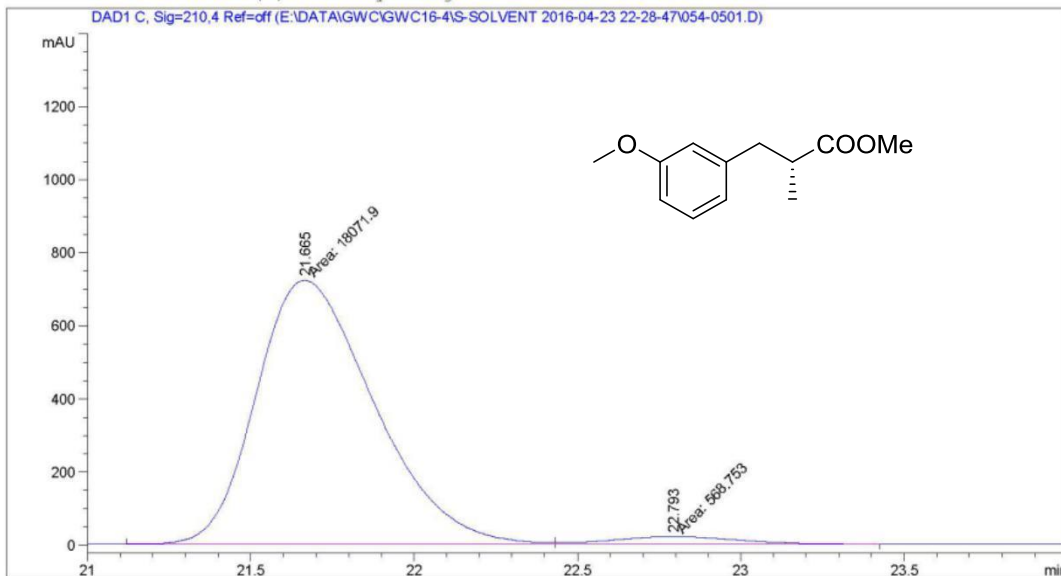

=====  
Area Percent Report  
=====

Sorted By : Signal  
Multiplier : 1.0000  
Dilution : 1.0000  
Use Multiplier & Dilution Factor with ISTDs

Signal 1: DAD1 C, Sig=210,4 Ref=off

| Peak # | RetTime [min] | Type | Width [min] | Area [mAU*s] | Height [mAU] | Area %  |
|--------|---------------|------|-------------|--------------|--------------|---------|
| 1      | 21.665        | MF   | 0.4174      | 1.80719e4    | 721.63135    | 96.9489 |
| 2      | 22.793        | FM   | 0.4560      | 568.75299    | 20.78808     | 3.0511  |

Totals : 1.86407e4 742.41943



# (R)-3-(4-methoxyphenyl)-2-methylpropanoic acid 8g

Data File E:\DATA\WQ\WQ-2-174\DAD-AD-90-10-WFY-2-112 2016-04-27 20-48-16\061-0901.D  
Sample Name: WQ-2-174-6-RAC

```
=====
Acq. Operator   : SYSTEM                               Seq. Line :    9
Acq. Instrument : 1260HPLC-DAD                         Location  : Vial 61
Injection Date  : 4/28/2016 12:57:48 AM                Inj       :    1
                                                Inj Volume: 5.000 µl
Acq. Method     : E:\DATA\WQ\WQ-2-174\DAD-AD-90-10-WFY-2-112 2016-04-27 20-48-16\DAD-OJ(1-6)-
99-1-0.5ML-40MIN.M
Last changed    : 4/27/2016 8:49:49 PM by SYSTEM
Analysis Method : E:\DATA\WQ\WQ-2-174\DAD-AD-90-10-WFY-2-112 2016-04-27 20-48-16\DAD-OJ(1-6)-
99-1-0.5ML-40MIN.M (Sequence Method)
Last changed    : 5/29/2016 8:31:38 PM by SYSTEM
                (modified after loading)
Additional Info : Peak(s) manually integrated
=====
```

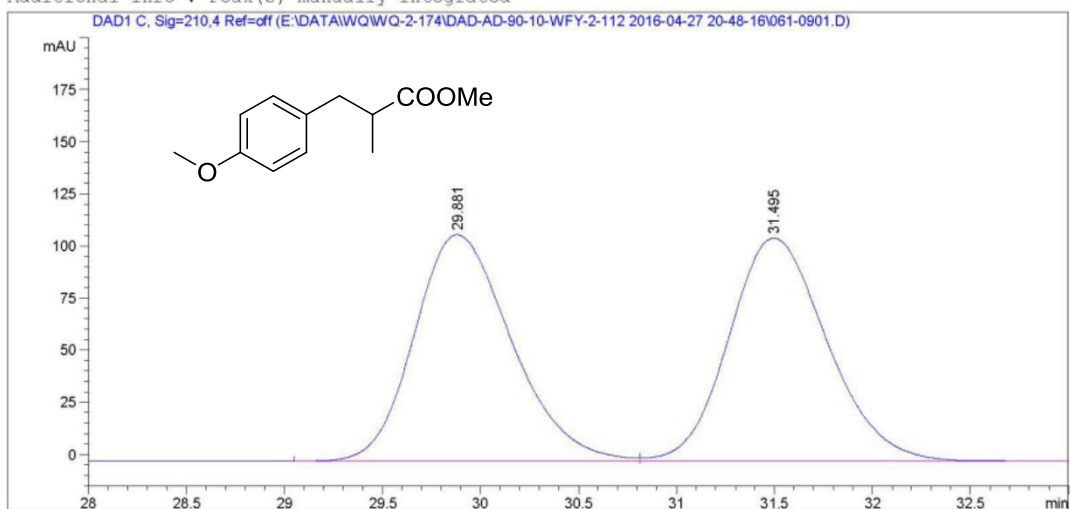

## Area Percent Report

```
Sorted By      : Signal
Multiplier     : 1.0000
Dilution      : 1.0000
Do not use Multiplier & Dilution Factor with ISTDs
```

Signal 1: DAD1 C, Sig=210,4 Ref=off

| Peak # | RetTime [min] | Type | Width [min] | Area [mAU*s] | Height [mAU] | Area %  |
|--------|---------------|------|-------------|--------------|--------------|---------|
| 1      | 29.881        | BV   | 0.5308      | 3754.36743   | 108.73714    | 50.0339 |
| 2      | 31.495        | VB   | 0.5402      | 3749.27979   | 107.16940    | 49.9661 |

Totals :                                 7503.64722   215.90655

\*\*\* End of Report \*\*\*



```
=====
Acq. Operator   : SYSTEM                      Seq. Line :   10
Acq. Instrument : 1260HPLC-DAD              Location  : Vial 62
Injection Date  : 4/28/2016 1:38:45 AM      Inj       :    1
                                           Inj Volume: 5.000 µl
Acq. Method     : E:\DATA\WQ\WQ-2-174\DAD-AD-90-10-WFY-2-112 2016-04-27 20-48-16\DAD-OJ(1-6)-
99-1-0.5ML-40MIN.M
Last changed    : 4/27/2016 8:49:49 PM by SYSTEM
Analysis Method : E:\DATA\WQ\WQ-2-174\DAD-AD-90-10-WFY-2-112 2016-04-27 20-48-16\DAD-OJ(1-6)-
99-1-0.5ML-40MIN.M (Sequence Method)
Last changed    : 5/29/2016 8:33:52 PM by SYSTEM
                 (modified after loading)
Additional Info : Peak(s) manually integrated
=====
```

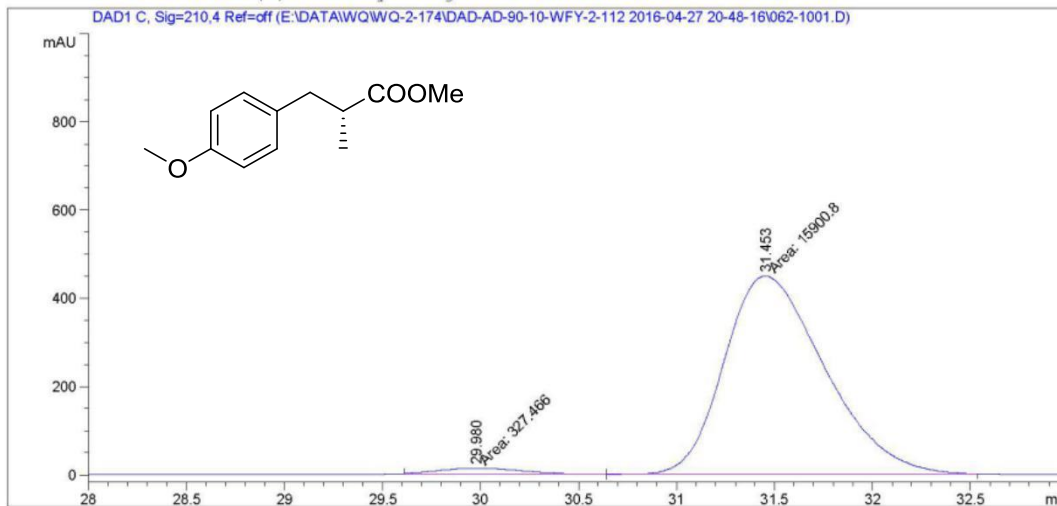

=====  
Area Percent Report  
=====

```
Sorted By      : Signal
Multiplier     : 1.0000
Dilution       : 1.0000
Do not use Multiplier & Dilution Factor with ISTDs
```

Signal 1: DAD1 C, Sig=210,4 Ref=off

| Peak # | RetTime [min] | Type | Width [min] | Area [mAU*s] | Height [mAU] | Area %  |
|--------|---------------|------|-------------|--------------|--------------|---------|
| 1      | 29.980        | MF   | 0.4523      | 327.46609    | 12.06774     | 2.0179  |
| 2      | 31.453        | FM   | 0.5923      | 1.59008e4    | 447.42841    | 97.9821 |

Totals : 1.62282e4 459.49614

=====  
\*\*\* End of Report \*\*\*

**(R)-2-methyl-3-(3,4,5-trimethoxyphenyl)propanoic acid 8h**

Data File E:\DATA\WQ\WQ-2-174\WQ-2-174-3 2016-04-27 22-50-47\011-1501.D  
Sample Name: WQ-2-174-10-RAC

```
=====
Acq. Operator   : SYSTEM                               Seq. Line :   15
Acq. Instrument : 1260HPLC-VWD                       Location  : Vial 11
Injection Date  : 4/28/2016 4:02:09 AM                Inj       :    1
                                                    Inj Volume: 5.000 µl
Acq. Method    : E:\DATA\WQ\WQ-2-174\WQ-2-174-3 2016-04-27 22-50-47\VWD-AD(1-6)-99-1-0.5ML-
                205NM-50MIN.M
Last changed   : 4/27/2016 10:50:47 PM by SYSTEM
Analysis Method: E:\DATA\WQ\WQ-2-174\WQ-2-174-3 2016-04-27 22-50-47\VWD-AD(1-6)-99-1-0.5ML-
                205NM-50MIN.M (Sequence Method)
Last changed   : 5/29/2016 8:42:27 PM by SYSTEM
                (modified after loading)
Additional Info : Peak(s) manually integrated
=====
```

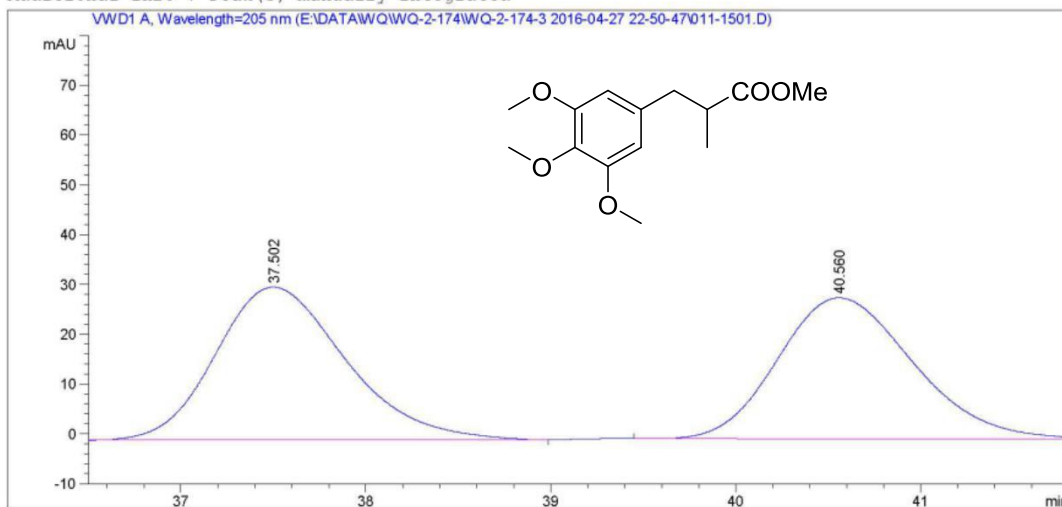

=====  
Area Percent Report  
=====

```
Sorted By      : Signal
Multiplier     : 1.0000
Dilution      : 1.0000
Do not use Multiplier & Dilution Factor with ISTDs
```

Signal 1: VWD1 A, Wavelength=205 nm

| Peak # | RetTime [min] | Type | Width [min] | Area [mAU*s] | Height [mAU] | Area %  |
|--------|---------------|------|-------------|--------------|--------------|---------|
| 1      | 37.502        | BB   | 0.7512      | 1501.69165   | 30.72799     | 50.8595 |
| 2      | 40.560        | BB   | 0.7937      | 1450.93335   | 28.36941     | 49.1405 |

Totals : 2952.62500 59.09740

=====  
\*\*\* End of Report \*\*\*

```

=====
Acq. Operator   : SYSTEM                               Seq. Line : 16
Acq. Instrument : 1260HPLC-VWD                       Location  : Vial 12
Injection Date  : 4/28/2016 4:52:55 AM                Inj       : 1
                                                    Inj Volume: 5.000 µl

Acq. Method    : E:\DATA\WQ\WQ-2-174\WQ-2-174-3 2016-04-27 22-50-47\VWD-AD(1-6)-99-1-0.5ML-
                205NM-50MIN.M
Last changed   : 4/27/2016 10:50:47 PM by SYSTEM
Analysis Method : E:\DATA\WQ\WQ-2-174\WQ-2-174-3 2016-04-27 22-50-47\VWD-AD(1-6)-99-1-0.5ML-
                205NM-50MIN.M (Sequence Method)
Last changed   : 5/29/2016 8:45:02 PM by SYSTEM
                (modified after loading)
Additional Info : Peak(s) manually integrated
  
```

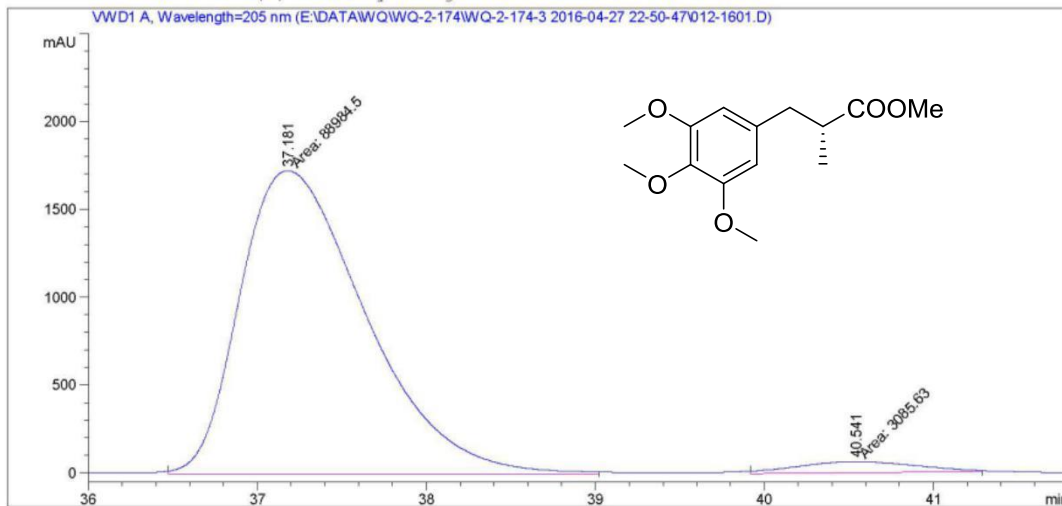

Area Percent Report

```

Sorted By      : Signal
Multiplier     : 1.0000
Dilution       : 1.0000
Do not use Multiplier & Dilution Factor with ISTDs
  
```

Signal 1: VWD1 A, Wavelength=205 nm

| Peak # | RetTime [min] | Type | Width [min] | Area [mAU*s] | Height [mAU] | Area %  |
|--------|---------------|------|-------------|--------------|--------------|---------|
| 1      | 37.181        | MM   | 0.8603      | 8.89845e4    | 1724.00012   | 96.6486 |
| 2      | 40.541        | MM   | 0.8230      | 3085.63428   | 62.48996     | 3.3514  |

Totals : 9.20701e4 1786.49008

\*\*\* End of Report \*\*\*

**(R)-3-(2-fluorophenyl)-2-methylpropanoic acid 8i**

Data File E:\DATA\WQ\WQ-2-182\WQ-2-182-2 2016-05-07 17-10-08\013-0201.D  
Sample Name: WQ-2-182-5-RAC

```

=====
Acq. Operator   : SYSTEM                               Seq. Line :    2
Acq. Instrument : 1260HPLC-VWD                        Location  : Vial 13
Injection Date  : 5/7/2016 5:21:52 PM                 Inj       :    1
                                                    Inj Volume: 3.000 µl
Acq. Method    : E:\DATA\WQ\WQ-2-182\WQ-2-182-2 2016-05-07 17-10-08\VWD-AS(1-2)-99-1-0.50ML-210NM-30MIN.M
Last changed   : 5/7/2016 5:10:08 PM by SYSTEM
Analysis Method : E:\DATA\WQ\WQ-2-182\WQ-2-182-2 2016-05-07 17-10-08\VWD-AS(1-2)-99-1-0.50ML-210NM-30MIN.M (Sequence Method)
Last changed   : 5/29/2016 9:14:21 PM by SYSTEM
                (modified after loading)
Additional Info : Peak(s) manually integrated
=====

```

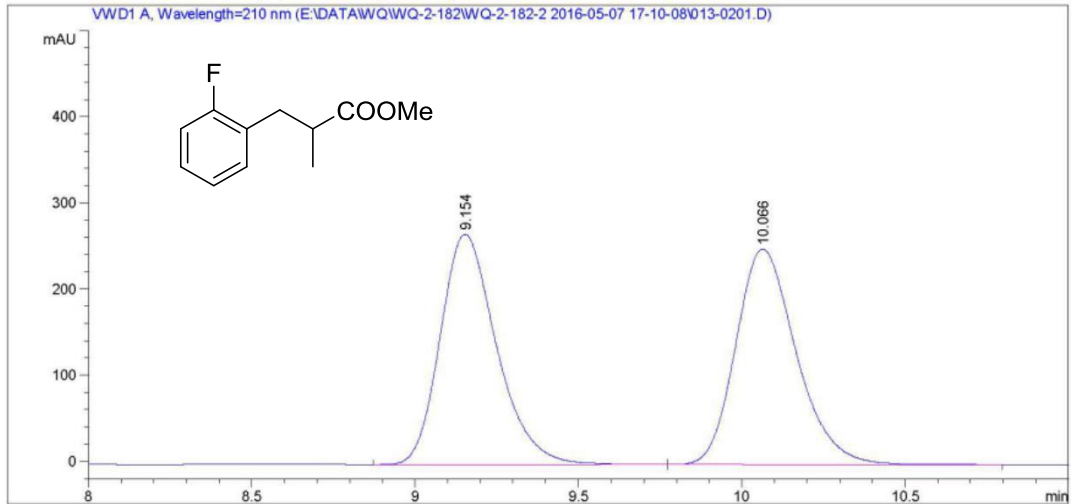

```

=====
Area Percent Report
=====

```

```

Sorted By      : Signal
Multiplier     : 1.0000
Dilution      : 1.0000
Do not use Multiplier & Dilution Factor with ISTDs

```

Signal 1: VWD1 A, Wavelength=210 nm

| Peak # | RetTime [min] | Type | Width [min] | Area [mAU*s] | Height [mAU] | Area %  |
|--------|---------------|------|-------------|--------------|--------------|---------|
| 1      | 9.154         | BB   | 0.1835      | 3193.89624   | 267.14471    | 49.9402 |
| 2      | 10.066        | BB   | 0.1964      | 3201.54761   | 249.94551    | 50.0598 |

```
Totals :                    6395.44385  517.09023
```

```

=====
*** End of Report ***
=====

```

Data File E:\DATA\WQ\WQ-2-182\WQ-2-182-2 2016-05-07 17-10-08\014-0301.D  
 Sample Name: WQ-2-182-5

```

=====
Acq. Operator   : SYSTEM                               Seq. Line :    3
Acq. Instrument : 1260HPLC-VWD                         Location  : Vial 14
Injection Date  : 5/7/2016 5:52:37 PM                  Inj       :    1
                                                    Inj Volume: 3.000 µl

Acq. Method     : E:\DATA\WQ\WQ-2-182\WQ-2-182-2 2016-05-07 17-10-08\VWD-AS(1-2)-99-1-0.50ML-
                  210NM-30MIN.M
Last changed    : 5/7/2016 5:10:08 PM by SYSTEM
Analysis Method : E:\DATA\WQ\WQ-2-182\WQ-2-182-2 2016-05-07 17-10-08\VWD-AS(1-2)-99-1-0.50ML-
                  210NM-30MIN.M (Sequence Method)
Last changed    : 5/29/2016 9:17:26 PM by SYSTEM
                  (modified after loading)
Additional Info  : Peak(s) manually integrated
  
```

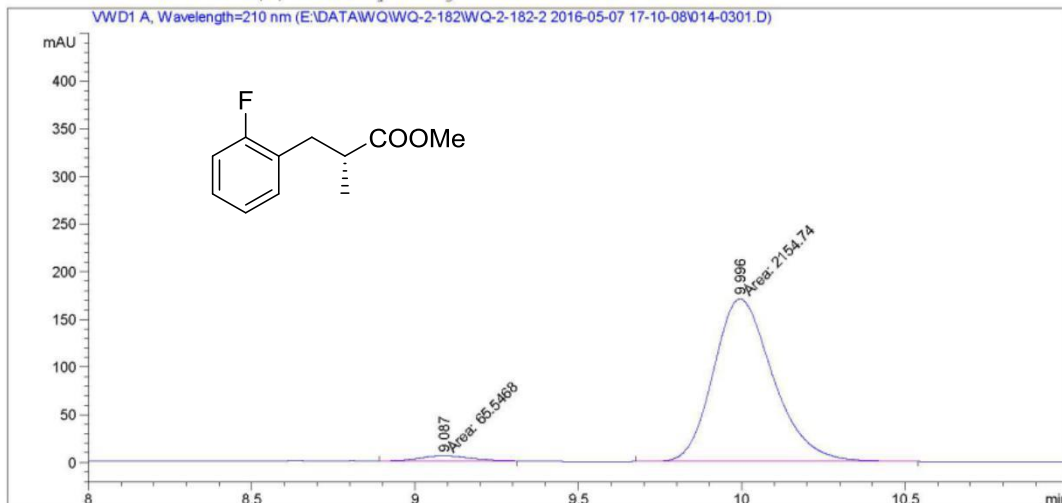

Area Percent Report

```

Sorted By      : Signal
Multiplier     : 1.0000
Dilution       : 1.0000
Do not use Multiplier & Dilution Factor with ISTDs
  
```

Signal 1: VWD1 A, Wavelength=210 nm

| Peak # | RetTime [min] | Type | Width [min] | Area [mAU*s] | Height [mAU] | Area %  |
|--------|---------------|------|-------------|--------------|--------------|---------|
| 1      | 9.087         | MM   | 0.1885      | 65.54678     | 5.79515      | 2.9522  |
| 2      | 9.996         | MM   | 0.2107      | 2154.74170   | 170.42198    | 97.0478 |

Totals : 2220.28848 176.21713

\*\*\* End of Report \*\*\*

**(R)-3-(3-fluorophenyl)-2-methylpropanoic acid 8j**

Data File E:\DATA\WQ\WQ-2-182\WQ-2-182-2 2016-05-07 17-10-08\015-0401.D  
Sample Name: WQ-2-182-6-RAC

```
=====
Acq. Operator   : SYSTEM                               Seq. Line :    4
Acq. Instrument : 1260HPLC-VWD                       Location  : Vial 15
Injection Date  : 5/7/2016 6:23:22 PM                Inj       :    1
                                                    Inj Volume: 3.000 µl
Acq. Method     : E:\DATA\WQ\WQ-2-182\WQ-2-182-2 2016-05-07 17-10-08\VWD-AS(1-2)-99-1-0.50ML-
                210NM-30MIN.M
Last changed    : 5/7/2016 5:10:08 PM by SYSTEM
Analysis Method : E:\DATA\WQ\WQ-2-182\WQ-2-182-2 2016-05-07 17-10-08\VWD-AS(1-2)-99-1-0.50ML-
                210NM-30MIN.M (Sequence Method)
Last changed    : 5/29/2016 9:20:25 PM by SYSTEM
                (modified after loading)
Additional Info : Peak(s) manually integrated
=====
```

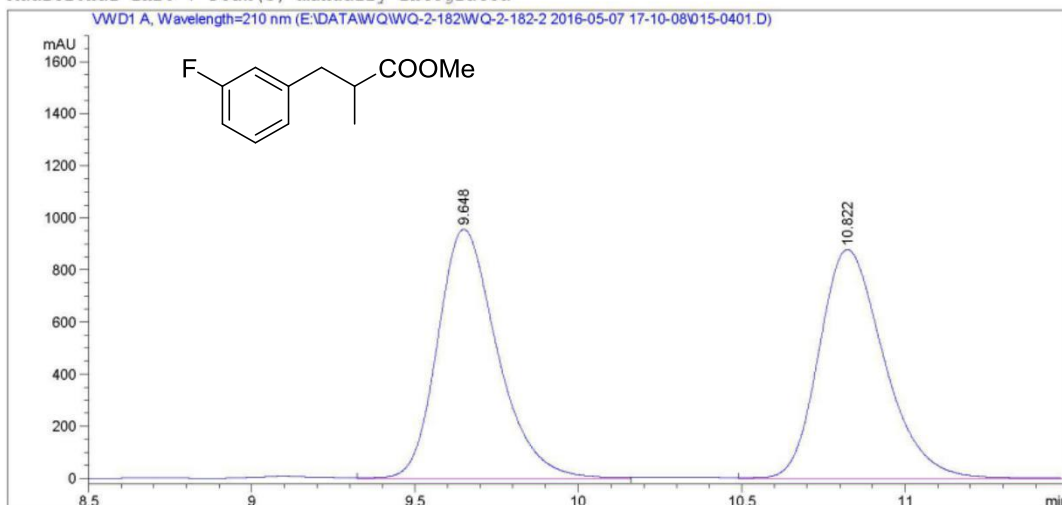

=====  
Area Percent Report  
=====

```
Sorted By      : Signal
Multiplier     : 1.0000
Dilution      : 1.0000
Do not use Multiplier & Dilution Factor with ISTDs
```

Signal 1: VWD1 A, Wavelength=210 nm

| Peak # | RetTime [min] | Type | Width [min] | Area [mAU*s] | Height [mAU] | Area %  |
|--------|---------------|------|-------------|--------------|--------------|---------|
| 1      | 9.648         | VV   | 0.1938      | 1.21032e4    | 955.40259    | 50.0189 |
| 2      | 10.822        | VB   | 0.2128      | 1.20940e4    | 877.66675    | 49.9811 |

Totals : 2.41972e4 1833.06934

=====  
\*\*\* End of Report \*\*\*

```

=====
Acq. Operator   : SYSTEM                               Seq. Line :    5
Acq. Instrument : 1260HPLC-VWD                         Location  : Vial 16
Injection Date  : 5/7/2016 6:54:06 PM                 Inj       :    1
                                                    Inj Volume: 3.000 µl
Acq. Method    : E:\DATA\WQ\WQ-2-182\WQ-2-182-2 2016-05-07 17-10-08\VWD-AS(1-2)-99-1-0.50ML-
                210NM-30MIN.M
Last changed   : 5/7/2016 5:10:08 PM by SYSTEM
Analysis Method : E:\DATA\WQ\WQ-2-182\WQ-2-182-2 2016-05-07 17-10-08\VWD-AS(1-2)-99-1-0.50ML-
                210NM-30MIN.M (Sequence Method)
Last changed   : 5/29/2016 9:21:07 PM by SYSTEM
                (modified after loading)
Additional Info : Peak(s) manually integrated
  
```

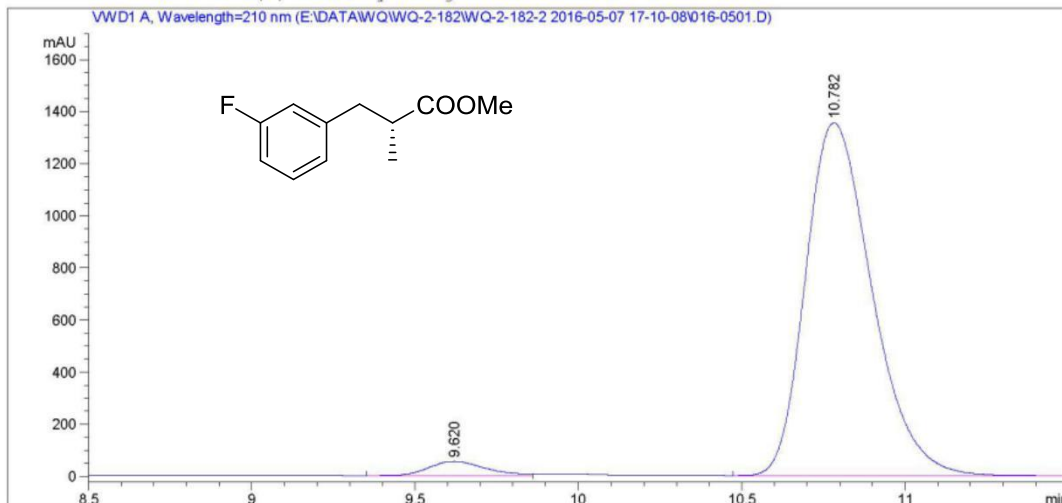

Area Percent Report

```

Sorted By      : Signal
Multiplier     : 1.0000
Dilution      : 1.0000
Do not use Multiplier & Dilution Factor with ISTDs
  
```

Signal 1: VWD1 A, Wavelength=210 nm

| Peak # | RetTime [min] | Type | Width [min] | Area [mAU*s] | Height [mAU] | Area %  |
|--------|---------------|------|-------------|--------------|--------------|---------|
| 1      | 9.620         | BV   | 0.1859      | 670.47961    | 55.12567     | 3.3845  |
| 2      | 10.782        | VB   | 0.2187      | 1.91398e4    | 1355.52502   | 96.6155 |

Totals : 1.98103e4 1410.65070

\*\*\* End of Report \*\*\*



**(R)-3-(4-fluorophenyl)-2-methylpropanoic acid 8k**

Data File E:\DATA\GWC\GWC16-4\S-SOLVENT 2016-04-23 21-26-46\057-0201.D  
Sample Name: WQ-2-172-4-RAC

=====

|                 |                        |            |            |
|-----------------|------------------------|------------|------------|
| Acq. Operator   | : SYSTEM               | Seq. Line  | : 2        |
| Acq. Instrument | : 1260HPLC-DAD         | Location   | : Vial 57  |
| Injection Date  | : 4/23/2016 9:38:46 PM | Inj        | : 1        |
|                 |                        | Inj Volume | : 5.000 µl |

Acq. Method : E:\DATA\GWC\GWC16-4\S-SOLVENT 2016-04-23 21-26-46\DAD-AS (1-2)-99-1-0.5ML-210NM--20MIN.M

Last changed : 4/23/2016 9:26:47 PM by SYSTEM

Analysis Method : E:\DATA\GWC\GWC16-4\S-SOLVENT 2016-04-23 21-26-46\DAD-AS (1-2)-99-1-0.5ML-210NM--20MIN.M (Sequence Method)

Last changed : 5/29/2016 8:13:13 PM by SYSTEM  
(modified after loading)

Additional Info : Peak(s) manually integrated

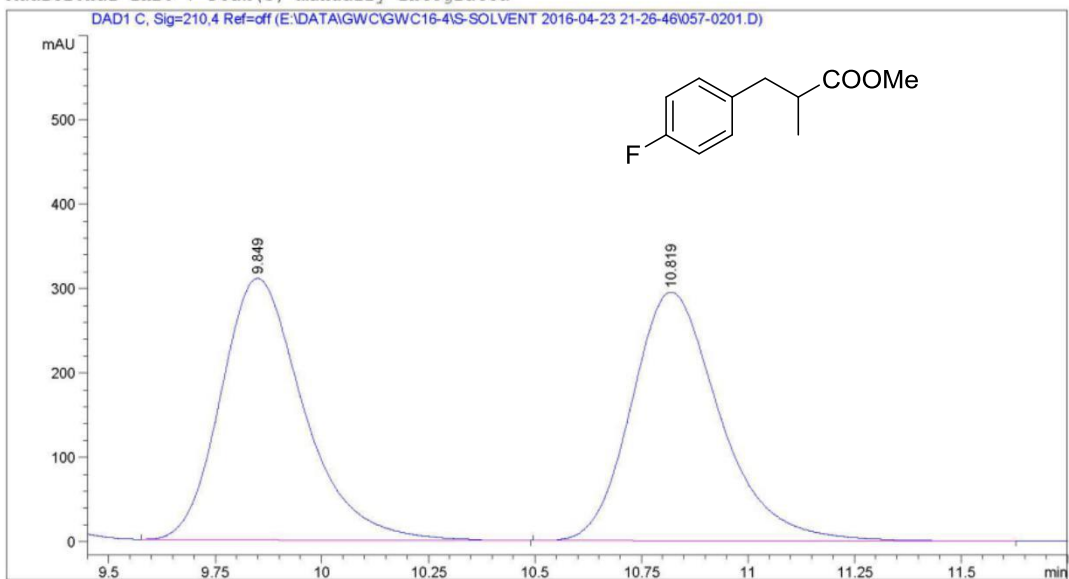

Area Percent Report

Sorted By : Signal  
Multiplier : 1.0000  
Dilution : 1.0000  
Do not use Multiplier & Dilution Factor with ISTDs

Signal 1: DAD1 C, Sig=210,4 Ref=off

| Peak # | RetTime [min] | Type | Width [min] | Area [mAU*s] | Height [mAU] | Area %  |
|--------|---------------|------|-------------|--------------|--------------|---------|
| 1      | 9.849         | BB   | 0.2055      | 4182.33057   | 309.82227    | 49.7090 |
| 2      | 10.819        | BB   | 0.2195      | 4231.29590   | 294.73523    | 50.2910 |

Totals : 8413.62646 604.55750



=====

|                 |                        |            |            |
|-----------------|------------------------|------------|------------|
| Acq. Operator   | : SYSTEM               | Seq. Line  | : 3        |
| Acq. Instrument | : 1260HPLC-DAD         | Location   | : Vial 58  |
| Injection Date  | : 4/23/2016 9:59:42 PM | Inj        | : 1        |
|                 |                        | Inj Volume | : 5.000 µl |

Acq. Method : E:\DATA\GWC\GWC16-4\S-SOLVENT 2016-04-23 21-26-46\DAD-AS(1-2)-99-1-0.5ML-210NM--20MIN.M

Last changed : 4/23/2016 9:26:47 PM by SYSTEM

Analysis Method : E:\DATA\GWC\GWC16-4\S-SOLVENT 2016-04-23 21-26-46\DAD-AS(1-2)-99-1-0.5ML-210NM--20MIN.M (Sequence Method)

Last changed : 5/29/2016 8:14:52 PM by SYSTEM  
(modified after loading)

Additional Info : Peak(s) manually integrated

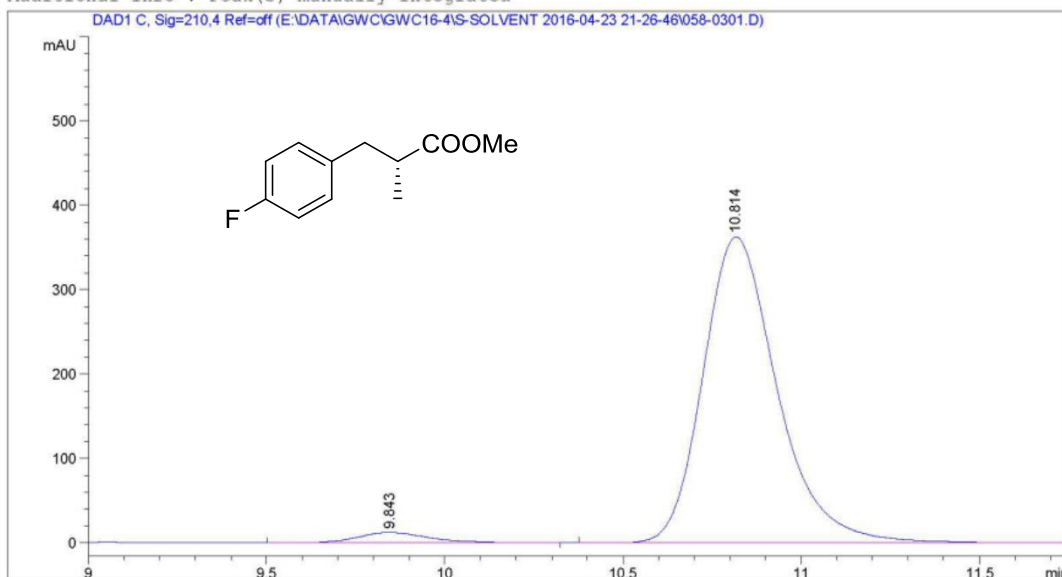

=====  
Area Percent Report  
=====

Sorted By : Signal  
Multiplier : 1.0000  
Dilution : 1.0000  
Do not use Multiplier & Dilution Factor with ISTDs

Signal 1: DAD1 C, Sig=210,4 Ref=off

| Peak # | RetTime [min] | Type | Width [min] | Area [mAU*s] | Height [mAU] | Area %  |
|--------|---------------|------|-------------|--------------|--------------|---------|
| 1      | 9.843         | BB   | 0.2056      | 162.86629    | 12.05527     | 3.0265  |
| 2      | 10.814        | BB   | 0.2201      | 5218.46924   | 362.18933    | 96.9735 |

Totals : 5381.33553 374.24461

## (R)-3-(4-chlorophenyl)-2-methylpropanoic acid 8I

Data File E:\DATA\WQ\WQ-2-184\WQ-2-184-3 2016-05-12 16-53-31\015-0201.D

Sample Name: wq-2-184-5-rac

```
=====
Acq. Operator   : SYSTEM                               Seq. Line :    2
Acq. Instrument : 1260HPLC-DAD                         Location  : Vial 15
Injection Date  : 5/12/2016 5:05:23 PM                 Inj       :    1
                                                    Inj Volume: 3.000 µl
Acq. Method    : E:\DATA\WQ\WQ-2-184\WQ-2-184-3 2016-05-12 16-53-31\DAD-AS(1-6)-99-1-0.5ML-3UL-30MIN.M
Last changed   : 5/12/2016 4:53:31 PM by SYSTEM
Analysis Method : E:\DATA\WQ\WQ-2-184\WQ-2-184-3 2016-05-12 16-53-31\DAD-AS(1-6)-99-1-0.5ML-3UL-30MIN.M (Sequence Method)
Last changed   : 5/29/2016 9:39:49 PM by SYSTEM
                (modified after loading)
Additional Info : Peak(s) manually integrated
=====
```

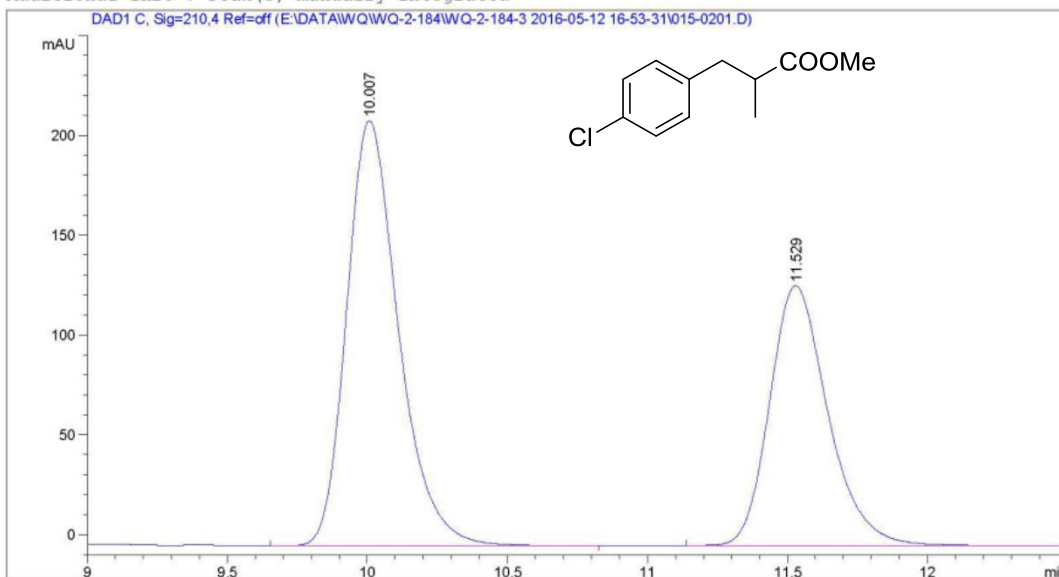

### Area Percent Report

```
Sorted By       : Signal
Multiplier      : 1.0000
Dilution       : 1.0000
Use Multiplier & Dilution Factor with ISTDs
```

Signal 1: DAD1 C, Sig=210,4 Ref=off

| Peak # | RetTime [min] | Type | Width [min] | Area [mAU*s] | Height [mAU] | Area %  |
|--------|---------------|------|-------------|--------------|--------------|---------|
| 1      | 10.007        | BB   | 0.1960      | 2736.16089   | 212.87825    | 59.2150 |
| 2      | 11.529        | BB   | 0.2211      | 1884.56213   | 130.05888    | 40.7850 |

Totals : 4620.72302 342.93713

=====

|                 |                        |            |            |
|-----------------|------------------------|------------|------------|
| Acq. Operator   | : SYSTEM               | Seq. Line  | : 3        |
| Acq. Instrument | : 1260HPLC-DAD         | Location   | : Vial 16  |
| Injection Date  | : 5/12/2016 5:36:17 PM | Inj        | : 1        |
|                 |                        | Inj Volume | : 3.000 µl |

Acq. Method : E:\DATA\WQ\WQ-2-184\WQ-2-184-3 2016-05-12 16-53-31\DAD-AS(1-6)-99-1-0.5ML-3UL-30MIN.M

Last changed : 5/12/2016 4:53:31 PM by SYSTEM

Analysis Method : E:\DATA\WQ\WQ-2-184\WQ-2-184-3 2016-05-12 16-53-31\DAD-AS(1-6)-99-1-0.5ML-3UL-30MIN.M (Sequence Method)

Last changed : 5/29/2016 9:41:10 PM by SYSTEM  
(modified after loading)

Additional Info : Peak(s) manually integrated

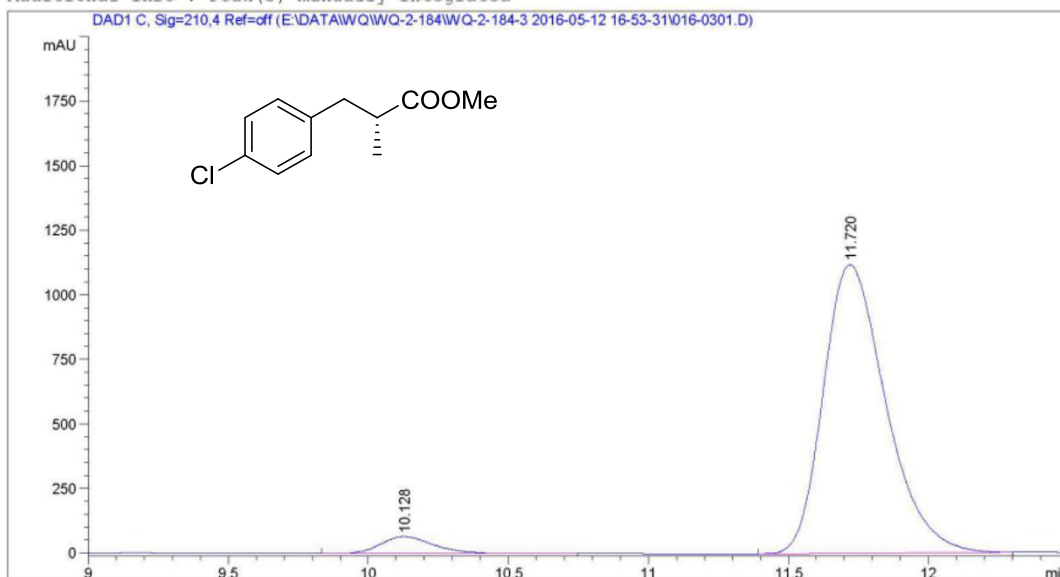

=====  
Area Percent Report  
=====

Sorted By : Signal  
Multiplier : 1.0000  
Dilution : 1.0000  
Use Multiplier & Dilution Factor with ISTDs

Signal 1: DAD1 C, Sig=210,4 Ref=off

| Peak # | RetTime [min] | Type | Width [min] | Area [mAU*s] | Height [mAU] | Area %  |
|--------|---------------|------|-------------|--------------|--------------|---------|
| 1      | 10.128        | BB   | 0.1994      | 855.14240    | 65.05398     | 4.7243  |
| 2      | 11.720        | BB   | 0.2380      | 1.72459e4    | 1117.64990   | 95.2757 |

Totals : 1.81011e4 1182.70388

**(R)-3-(4-bromophenyl)-2-methylpropanoic acid 8m**

Data File E:\DATA\WQ\WQ-2-184\WQ-2-184-2 2016-05-12 14-17-49\013-0501.D  
Sample Name: wq-2-184-4-rac

```
=====
Acq. Operator   : SYSTEM                               Seq. Line :    5
Acq. Instrument : 1260HPLC-DAD                       Location  : Vial 13
Injection Date  : 5/12/2016 3:43:26 PM                Inj       :    1
                                                    Inj Volume: 2.000 µl
Acq. Method     : E:\DATA\WQ\WQ-2-184\WQ-2-184-2 2016-05-12 14-17-49\DAD-OJ(1-6)-99-1-0.5ML-
                2UL-205-35MIN.M
Last changed    : 5/12/2016 4:15:38 PM by SYSTEM
                (modified after loading)
Analysis Method : E:\DATA\WQ\WQ-2-184\WQ-2-184-2 2016-05-12 14-17-49\DAD-OJ(1-6)-99-1-0.5ML-
                2UL-205-35MIN.M (Sequence Method)
Last changed    : 5/29/2016 9:36:20 PM by SYSTEM
                (modified after loading)
Additional Info  : Peak(s) manually integrated
=====
```

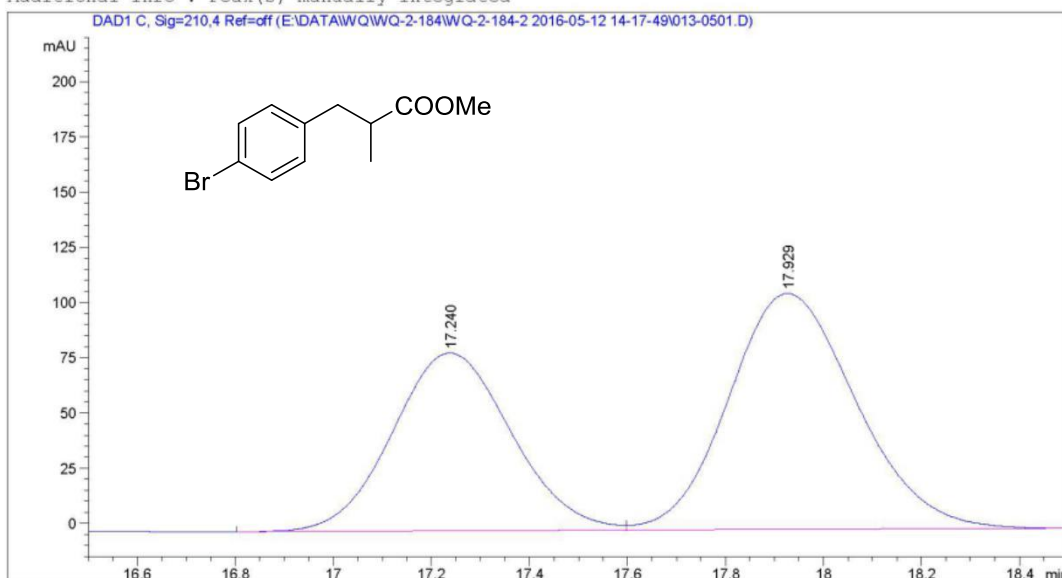

Area Percent Report

```
Sorted By      : Signal
Multiplier     : 1.0000
Dilution       : 1.0000
Do not use Multiplier & Dilution Factor with ISTDs
```

Signal 1: DAD1 C, Sig=210,4 Ref=off

| Peak # | RetTime [min] | Type | Width [min] | Area [mAU*s] | Height [mAU] | Area %  |
|--------|---------------|------|-------------|--------------|--------------|---------|
| 1      | 17.240        | BV   | 0.2627      | 1357.95508   | 80.53570     | 41.2991 |
| 2      | 17.929        | VB   | 0.2807      | 1930.14392   | 106.89675    | 58.7009 |

Totals : 3288.09900 187.43245

Data File E:\DATA\WQ\WQ-2-184\WQ-2-184-2 2016-05-12 14-17-49\014-0601.D  
 Sample Name: wq-2-184-4-rac

```

=====
Acq. Operator   : SYSTEM                               Seq. Line :    6
Acq. Instrument : 1260HPLC-DAD                         Location  : Vial 14
Injection Date  : 5/12/2016 4:16:31 PM                 Inj       :    1
                                                    Inj Volume: 2.000 µl

Acq. Method     : E:\DATA\WQ\WQ-2-184\WQ-2-184-2 2016-05-12 14-17-49\DAD-OJ(1-6)-99-1-0.5ML-
                  2UL-205-35MIN.M
Last changed    : 5/12/2016 4:15:38 PM by SYSTEM
Analysis Method : E:\DATA\WQ\WQ-2-184\WQ-2-184-2 2016-05-12 14-17-49\DAD-OJ(1-6)-99-1-0.5ML-
                  2UL-205-35MIN.M (Sequence Method)
Last changed    : 5/29/2016 9:37:49 PM by SYSTEM
                  (modified after loading)
Additional Info  : Peak(s) manually integrated
  
```

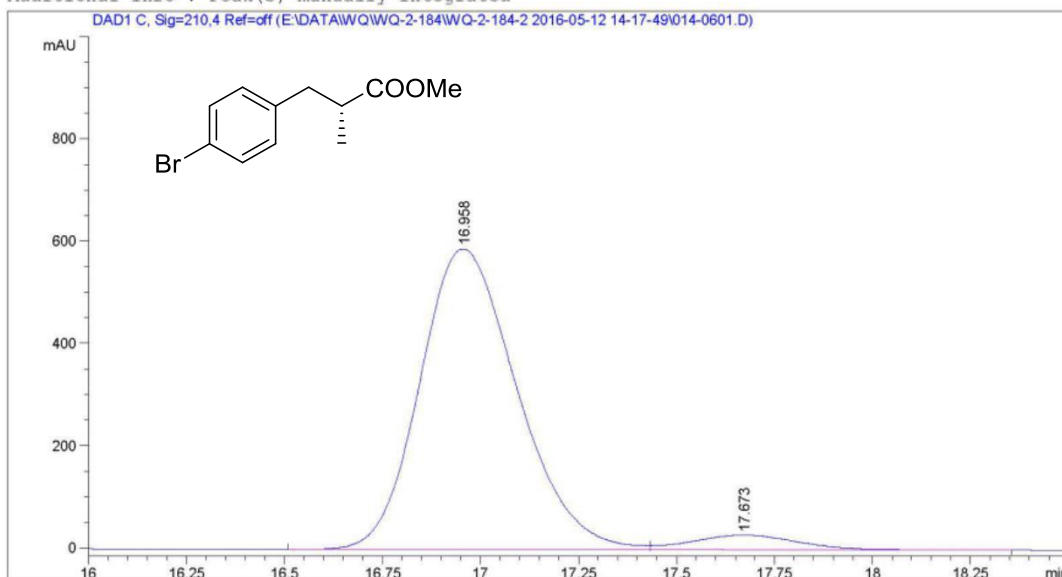

Area Percent Report

```

Sorted By      : Signal
Multiplier     : 1.0000
Dilution      : 1.0000
Do not use Multiplier & Dilution Factor with ISTDs
  
```

Signal 1: DAD1 C, Sig=210,4 Ref=off

| Peak # | RetTime [min] | Type | Width [min] | Area [mAU*s] | Height [mAU] | Area %  |
|--------|---------------|------|-------------|--------------|--------------|---------|
| 1      | 16.958        | BV   | 0.2663      | 1.00925e4    | 587.89148    | 94.9124 |
| 2      | 17.673        | VB   | 0.2878      | 540.98395    | 28.71175     | 5.0876  |

Totals : 1.06335e4 616.60323

**(R)-3-(furan-2-yl)-2-methylpropanoic acid 8n**

Data File E:\DATA\WQ\WQ-2-199\WQ-2-199 2016-05-30 16-07-48\001-0201.D  
Sample Name: wq-2-199-2-rac

```
=====
Acq. Operator   : SYSTEM                               Seq. Line :    2
Acq. Instrument : 1260HPLC-DAD                         Location  : Vial 1
Injection Date  : 5/30/2016 4:24:40 PM                 Inj       :    1
                                                    Inj Volume: 2.000 µl
Acq. Method     : E:\DATA\WQ\WQ-2-199\WQ-2-199 2016-05-30 16-07-48\DAD-OD(1-2)-99-1-0.5ML-2UL
                  -205-35MIN.M
Last changed    : 5/30/2016 4:59:43 PM by SYSTEM
                  (modified after loading)
Analysis Method : E:\DATA\WQ\WQ-2-199\WQ-2-199 2016-05-30 16-07-48\DAD-OD(1-2)-99-1-0.5ML-2UL
                  -205-35MIN.M (Sequence Method)
Last changed    : 6/7/2016 10:12:26 AM by SYSTEM
                  (modified after loading)
Additional Info  : Peak(s) manually integrated
=====
```

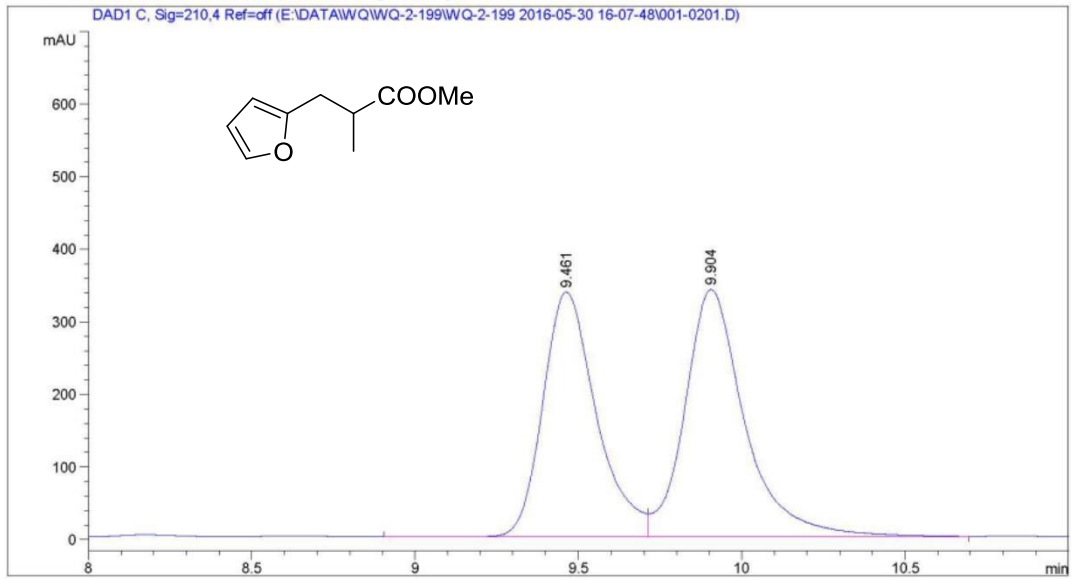

=====  
Area Percent Report  
=====

Sorted By : Signal  
Multiplier : 1.0000  
Dilution : 1.0000  
Do not use Multiplier & Dilution Factor with ISTDs

Signal 1: DAD1 C, Sig=210,4 Ref=off

| Peak # | RetTime [min] | Type | Width [min] | Area [mAU*s] | Height [mAU] | Area %  |
|--------|---------------|------|-------------|--------------|--------------|---------|
| 1      | 9.461         | BV   | 0.1701      | 3815.09814   | 336.93869    | 47.0180 |
| 2      | 9.904         | VB   | 0.1875      | 4299.02002   | 340.02939    | 52.9820 |

Totals : 8114.11816 676.96808

Data File E:\DATA\WQ\WQ-2-199\WQ-2-199 2016-05-30 16-07-48\002-0301.D  
 Sample Name: wq-2-199-2

```

=====
Acq. Operator   : SYSTEM                               Seq. Line :    3
Acq. Instrument : 1260HPLC-DAD                         Location  : Vial 2
Injection Date  : 5/30/2016 5:00:34 PM                 Inj       :    1
                                                    Inj Volume: 2.000 µl

Acq. Method     : E:\DATA\WQ\WQ-2-199\WQ-2-199 2016-05-30 16-07-48\DAD-OD(1-2)-99-1-0.5ML-2UL
                  -205-35MIN.M
Last changed    : 5/30/2016 4:59:43 PM by SYSTEM
Analysis Method : E:\DATA\WQ\WQ-2-199\WQ-2-199 2016-05-30 16-07-48\DAD-OD(1-2)-99-1-0.5ML-2UL
                  -205-35MIN.M (Sequence Method)
Last changed    : 6/7/2016 10:14:34 AM by SYSTEM
                  (modified after loading)
Additional Info  : Peak(s) manually integrated
  
```

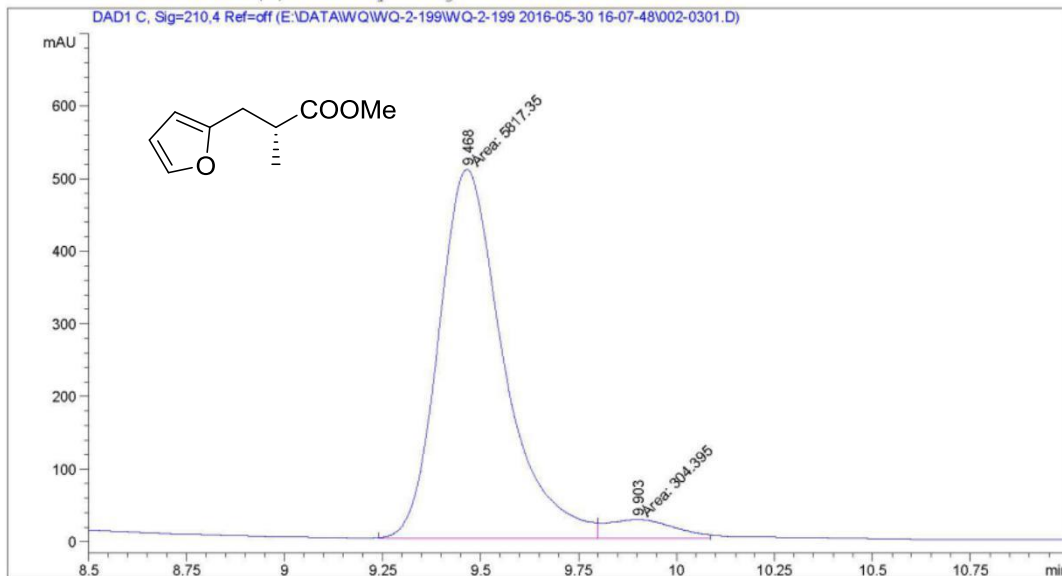

Area Percent Report

```

Sorted By      : Signal
Multiplier     : 1.0000
Dilution       : 1.0000
Do not use Multiplier & Dilution Factor with ISTDs
  
```

Signal 1: DAD1 C, Sig=210,4 Ref=off

| Peak # | RetTime [min] | Type | Width [min] | Area [mAU*s] | Height [mAU] | Area %  |
|--------|---------------|------|-------------|--------------|--------------|---------|
| 1      | 9.468         | MF   | 0.1909      | 5817.34912   | 507.86591    | 95.0276 |
| 2      | 9.903         | FM   | 0.1997      | 304.39493    | 25.39856     | 4.9724  |

Totals : 6121.74405 533.26447

(R)-3-cyclohexyl-2-methylpropanoic acid **8o**

SHIMADZU  
LabSolutions Analysis Report

<Sample Information>

Sample Name : wq-cy-4  
Sample ID :  
Data Filename : wq-cy-4.gcd  
Method Filename : bdex120-250-80-150-260-170min.gcm  
Batch Filename : wq-cy-4.gcb  
Vial # : 26  
Injection Volume : 1 uL  
Date Acquired : 2016-5-14 10:56:38  
Date Processed : 2016-5-23 21:08:23  
Sample Type : Unknown  
Acquired by : System Administrator  
Processed by : System Administrator

<Chromatogram>

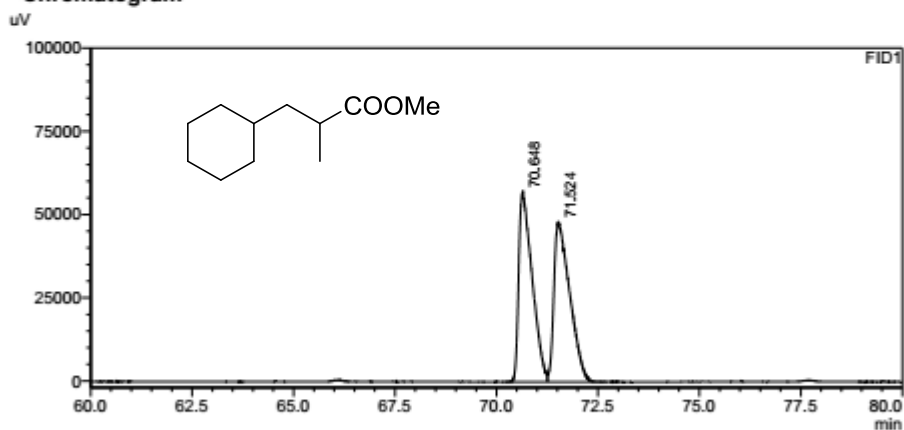

<Peak Table>

| Peak# | Ret. Time | Area    | Height | Conc.  | Unit | Mark | Name |
|-------|-----------|---------|--------|--------|------|------|------|
| 1     | 70.648    | 1314708 | 57141  | 50.093 |      | M    |      |
| 2     | 71.524    | 1309838 | 48019  | 49.907 |      | V M  |      |
| Total |           | 2624546 | 105160 |        |      |      |      |



## <Sample Information>

Sample Name : wq-cy-guanghuo  
 Sample ID :  
 Data Filename : wq-cy-guanghuo.gcd  
 Method Filename : bdex120-250-80-150-260-170min.gcm  
 Batch Filename : wq-cy-guanghuo.gcb  
 Vial # : 6  
 Injection Volume : 1 uL  
 Date Acquired : 2016-5-23 19:51:24  
 Date Processed : 2016-5-23 22:55:58

Sample Type : Unknown  
 Acquired by : System Administrator  
 Processed by : System Administrator

## <Chromatogram>

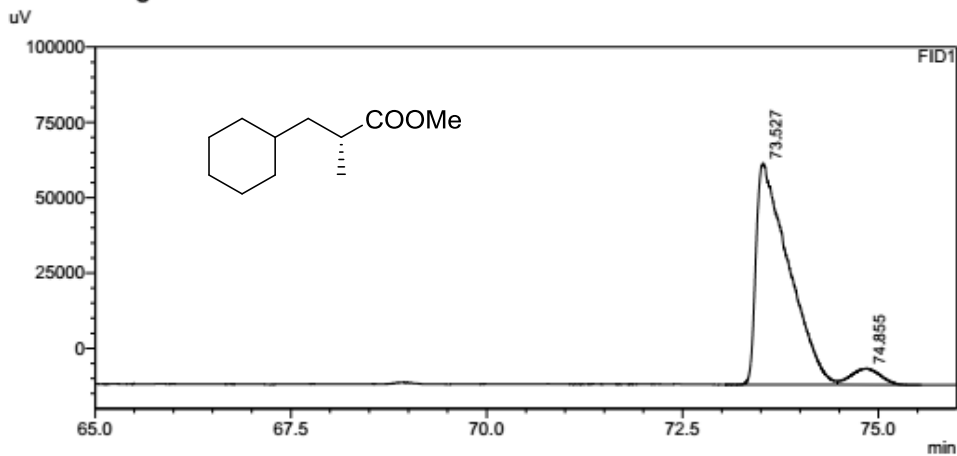

## <Peak Table>

FID1

| Peak# | Ret. Time | Area    | Height | Conc.  | Unit | Mark | Name |
|-------|-----------|---------|--------|--------|------|------|------|
| 1     | 73.527    | 2126550 | 73524  | 93.774 |      | M    |      |
| 2     | 74.855    | 141193  | 5411   | 6.226  |      | V M  |      |
| Total |           | 2267743 | 78935  |        |      |      |      |

(R)-2-benzylbutanoic acid **8p**

Data File E:\DATA\GWC\GWC16-4\S-SOLVENT 2016-04-23 22-28-47\059-0801.D  
Sample Name: WQ-2-172-5-RAC

=====

|                 |                                                                                                             |            |                 |
|-----------------|-------------------------------------------------------------------------------------------------------------|------------|-----------------|
| Acq. Operator   | : SYSTEM                                                                                                    | Seq. Line  | : 8             |
| Acq. Instrument | : 1260HPLC-DAD                                                                                              | Location   | : Vial 59       |
| Injection Date  | : 4/24/2016 2:16:32 AM                                                                                      | Inj        | : 1             |
|                 |                                                                                                             | Inj Volume | : 5.000 $\mu$ l |
| Acq. Method     | : E:\DATA\GWC\GWC16-4\S-SOLVENT 2016-04-23 22-28-47\DAD-OJ(1-6)-99-1-0.5ML-210NM--30MIN.M                   |            |                 |
| Last changed    | : 4/23/2016 10:28:48 PM by SYSTEM                                                                           |            |                 |
| Analysis Method | : E:\DATA\GWC\GWC16-4\S-SOLVENT 2016-04-23 22-28-47\DAD-OJ(1-6)-99-1-0.5ML-210NM--30MIN.M (Sequence Method) |            |                 |
| Last changed    | : 5/29/2016 8:21:14 PM by SYSTEM (modified after loading)                                                   |            |                 |

Additional Info : Peak(s) manually integrated

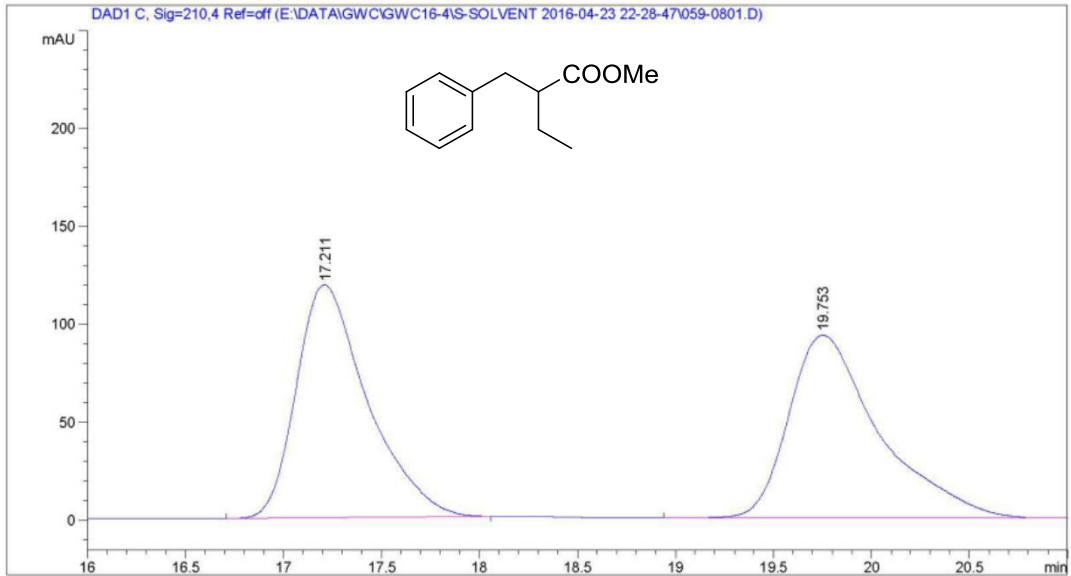

=====  
Area Percent Report  
=====

Sorted By : Signal  
Multiplier : 1.0000  
Dilution : 1.0000  
Do not use Multiplier & Dilution Factor with ISTDs

Signal 1: DAD1 C, Sig=210,4 Ref=off

| Peak # | RetTime [min] | Type | Width [min] | Area [mAU*s] | Height [mAU] | Area %  |
|--------|---------------|------|-------------|--------------|--------------|---------|
| 1      | 17.211        | BB   | 0.3730      | 2986.34375   | 118.90550    | 50.0523 |
| 2      | 19.753        | BB   | 0.4682      | 2980.10596   | 93.39954     | 49.9477 |

Totals : 5966.44971 212.30505

Sample Name: WQ-2-172-5

```

=====
Acq. Operator   : SYSTEM                      Seq. Line :    9
Acq. Instrument : 1260HPLC-DAD                Location  : Vial 60
Injection Date  : 4/24/2016 2:47:28 AM       Inj       :    1
                                           Inj Volume: 5.000 µl

Acq. Method     : E:\DATA\GWC\GWC16-4\S-SOLVENT 2016-04-23 22-28-47\DAD-OJ(1-6)-99-1-0.5ML-
                  210NM--30MIN.M
Last changed    : 4/23/2016 10:28:48 PM by SYSTEM
Analysis Method : E:\DATA\GWC\GWC16-4\S-SOLVENT 2016-04-23 22-28-47\DAD-OJ(1-6)-99-1-0.5ML-
                  210NM--30MIN.M (Sequence Method)
Last changed    : 5/29/2016 8:26:45 PM by SYSTEM
                  (modified after loading)
Additional Info  : Peak(s) manually integrated
    
```

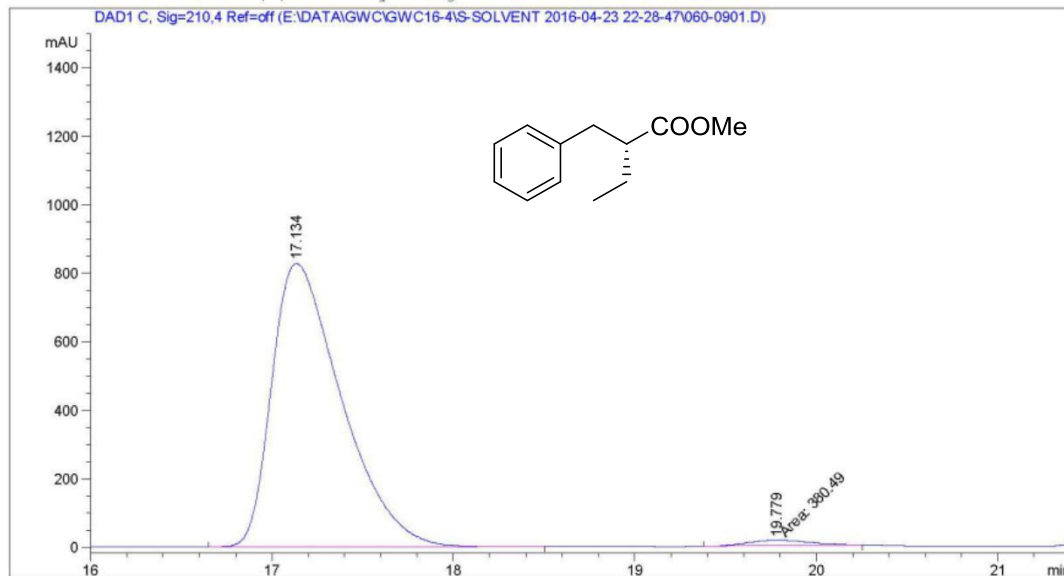

Area Percent Report

```

Sorted By      : Signal
Multiplier     : 1.0000
Dilution       : 1.0000
Do not use Multiplier & Dilution Factor with ISTDs
    
```

Signal 1: DAD1 C, Sig=210,4 Ref=off

| Peak # | RetTime [min] | Type | Width [min] | Area [mAU*s] | Height [mAU] | Area %  |
|--------|---------------|------|-------------|--------------|--------------|---------|
| 1      | 17.134        | BB   | 0.4026      | 2.20230e4    | 827.18225    | 98.3017 |
| 2      | 19.779        | MM   | 0.3977      | 380.48965    | 15.94494     | 1.6983  |

Totals :                    2.24035e4   843.12719

**(S)-2-benzyl-3-methylbutanoic acid 8q**

Data File E:\DATA\WQ\WQ-2-182\WQ-2-182 2016-05-07 12-26-34\013-1201.D  
Sample Name: WQ-2-182-7-RAC

=====  
Acq. Operator : SYSTEM Seq. Line : 12  
Acq. Instrument : 1260HPLC-DAD Location : Vial 13  
Injection Date : 5/7/2016 5:28:42 PM Inj : 1  
Inj Volume : 2.000 µl  
Acq. Method : E:\DATA\WQ\WQ-2-182\WQ-2-182 2016-05-07 12-26-34\DAD-OJ(1-6)-99-1-0.5ML-2UL  
-205-35MIN.M  
Last changed : 5/7/2016 12:44:53 PM by SYSTEM  
Analysis Method : E:\DATA\WQ\WQ-2-182\WQ-2-182 2016-05-07 12-26-34\DAD-OJ(1-6)-99-1-0.5ML-2UL  
-205-35MIN.M (Sequence Method)  
Last changed : 5/29/2016 9:29:13 PM by SYSTEM  
(modified after loading)  
Additional Info : Peak(s) manually integrated

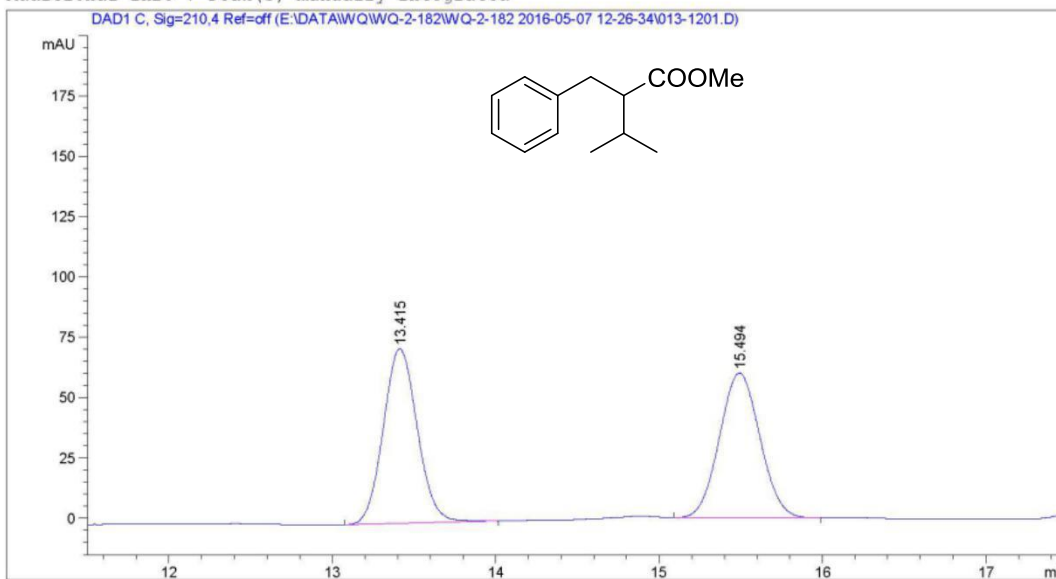

=====  
Area Percent Report  
=====

Sorted By : Signal  
Multiplier : 1.0000  
Dilution : 1.0000  
Do not use Multiplier & Dilution Factor with ISTDs

Signal 1: DAD1 C, Sig=210,4 Ref=off

| Peak # | RetTime [min] | Type | Width [min] | Area [mAU*s] | Height [mAU] | Area %  |
|--------|---------------|------|-------------|--------------|--------------|---------|
| 1      | 13.415        | BB   | 0.2245      | 1046.47876   | 72.44518     | 50.5160 |
| 2      | 15.494        | BB   | 0.2699      | 1025.09985   | 59.83932     | 49.4840 |

Totals : 2071.57861 132.28451

Data File E:\DATA\WQ\WQ-2-182\WQ-2-182 2016-05-07 12-26-34\014-1301.D  
Sample Name: WQ-2-182-7

```
=====
Acq. Operator   : SYSTEM                               Seq. Line :   13
Acq. Instrument : 1260HPLC-DAD                       Location  : Vial 14
Injection Date  : 5/7/2016 6:04:36 PM                Inj       :    1
                                                    Inj Volume: 2.000 µl

Acq. Method     : E:\DATA\WQ\WQ-2-182\WQ-2-182 2016-05-07 12-26-34\DAD-OJ(1-6)-99-1-0.5ML-2UL
                  -205-35MIN.M
Last changed    : 5/7/2016 12:44:53 PM by SYSTEM
Analysis Method : E:\DATA\WQ\WQ-2-182\WQ-2-182 2016-05-07 12-26-34\DAD-OJ(1-6)-99-1-0.5ML-2UL
                  -205-35MIN.M (Sequence Method)
Last changed    : 5/29/2016 9:33:08 PM by SYSTEM
                  (modified after loading)
Additional Info  : Peak(s) manually integrated
=====
```

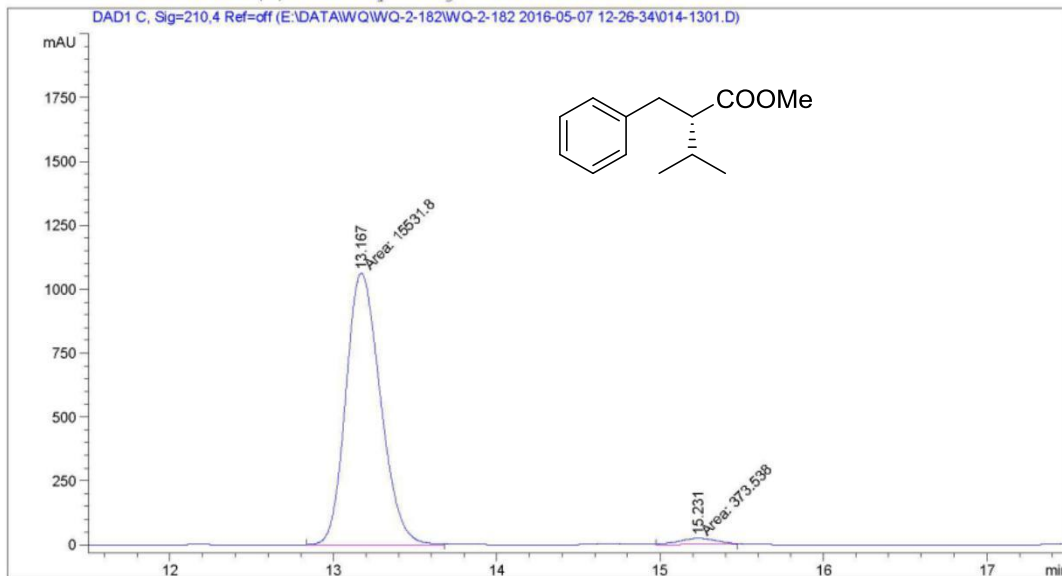

Area Percent Report

```
Sorted By      : Signal
Multiplier     : 1.0000
Dilution       : 1.0000
Do not use Multiplier & Dilution Factor with ISTDs
```

Signal 1: DAD1 C, Sig=210,4 Ref=off

| Peak # | RetTime [min] | Type | Width [min] | Area [mAU*s] | Height [mAU] | Area %  |
|--------|---------------|------|-------------|--------------|--------------|---------|
| 1      | 13.167        | MM   | 0.2439      | 1.55318e4    | 1061.47192   | 97.6515 |
| 2      | 15.231        | MM   | 0.2697      | 373.53757    | 23.07980     | 2.3485  |

Totals : 1.59053e4 1084.55173

(S)-2,3-diphenylpropanoic acid **8r**

Data File E:\DATA\WQ\WQ-3-69\WQ-3-69-2 2016-12-14 21-35-07\052-0301.D  
Sample Name: WQ-3-69-2

```
=====
Acq. Operator   : SYSTEM                               Seq. Line :    3
Acq. Instrument : 1260HPLC-DAD                        Location  : Vial 52
Injection Date  : 12/14/2016 10:47:59 PM              Inj       :    1
                                                       Inj Volume: 1.000 µl
Acq. Method     : E:\DATA\WQ\WQ-3-69\WQ-3-69-2 2016-12-14 21-35-07\DAD-OD(1-2)-99-1-1UL-0.
                 5ML-210NM-60MIN.M
Last changed    : 12/14/2016 9:35:07 PM by SYSTEM
Analysis Method : E:\DATA\WQ\WQ-3-69\WQ-3-69-2 2016-12-14 21-35-07\DAD-OD(1-2)-99-1-1UL-0.
                 5ML-210NM-60MIN.M (Sequence Method)
Last changed    : 12/19/2016 9:08:34 AM by SYSTEM
                 (modified after loading)
Additional Info  : Peak(s) manually integrated
=====
```

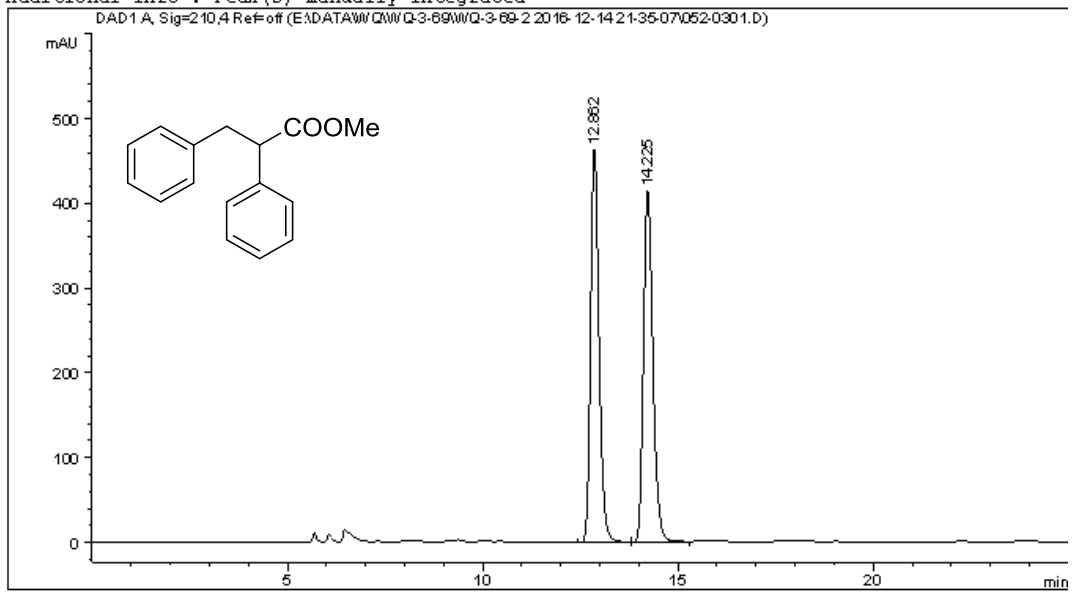

=====  
Area Percent Report  
=====

```
Sorted By       : Signal
Multiplier      : 1.0000
Dilution        : 1.0000
Do not use Multiplier & Dilution Factor with ISTDs
```

Signal 1: DAD1 A, Sig=210,4 Ref=off

| Peak # | RetTime [min] | Type | Width [min] | Area [mAU*s] | Height [mAU] | Area %  |
|--------|---------------|------|-------------|--------------|--------------|---------|
| 1      | 12.862        | BB   | 0.2286      | 6941.72656   | 463.73779    | 50.0201 |
| 2      | 14.225        | BB   | 0.2555      | 6936.13574   | 413.99414    | 49.9799 |

Totals :                    1.38779e4   877.73193

=====  
\*\*\* End of Report \*\*\*

Data File E:\DATA\WQ\WQ-3-70\WQ-3-70 2016-12-15 16-19-03\015-0401.D  
Sample Name: WQ-3-70-2

=====  
Acq. Operator : SYSTEM Seq. Line : 4  
Acq. Instrument : 1260HPLC-DAD Location : Vial 15  
Injection Date : 12/15/2016 5:07:58 PM Inj : 1  
Inj Volume : 2.000 µl  
Acq. Method : E:\DATA\WQ\WQ-3-70\WQ-3-70 2016-12-15 16-19-03\DAD-OD(1-2)-99-1-0.5ML-  
2UL-25MIN.M  
Last changed : 12/15/2016 4:19:03 PM by SYSTEM  
Analysis Method : E:\DATA\WQ\WQ-3-70\WQ-3-70 2016-12-15 16-19-03\DAD-OD(1-2)-99-1-0.5ML-  
2UL-25MIN.M (Sequence Method)  
Last changed : 12/19/2016 9:10:49 AM by SYSTEM  
(modified after loading)  
Additional Info : Peak(s) manually integrated

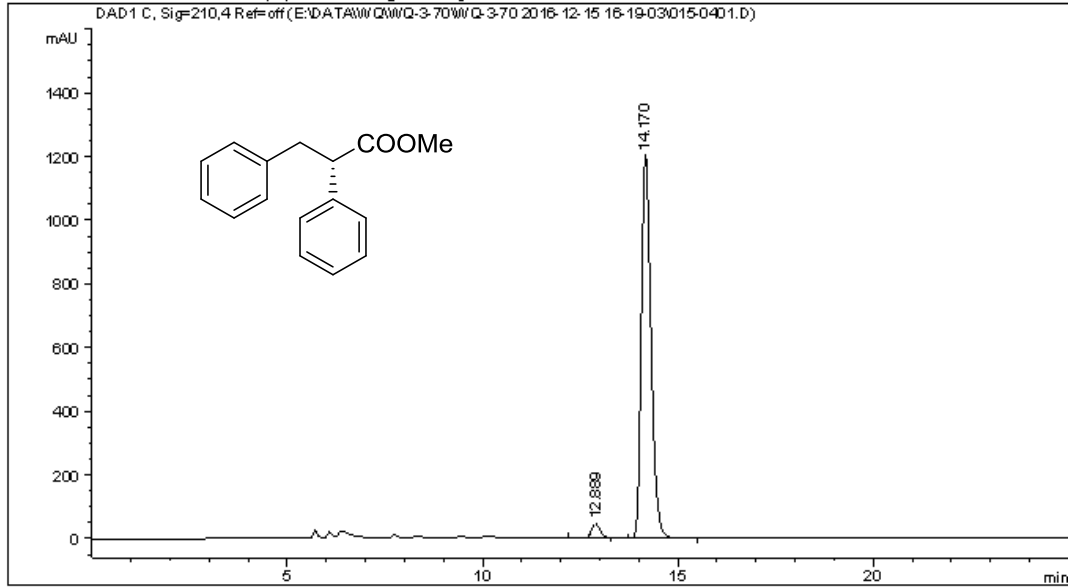

=====  
Area Percent Report  
=====

Sorted By : Signal  
Multiplier : 1.0000  
Dilution : 1.0000  
Do not use Multiplier & Dilution Factor with ISTDs

Signal 1: DAD1 C, Sig=210,4 Ref=off

| Peak # | RetTime [min] | Type | Width [min] | Area [mAU*s] | Height [mAU] | Area %  |
|--------|---------------|------|-------------|--------------|--------------|---------|
| 1      | 12.889        | BB   | 0.2279      | 660.16901    | 44.29417     | 3.0872  |
| 2      | 14.170        | BB   | 0.2649      | 2.07241e4    | 1203.23914   | 96.9128 |

Totals : 2.13843e4 1247.53331

=====  
\*\*\* End of Report \*\*\*

## VI. Reference

1. T. Sugimura, J. Watanabe, T. Uchida, Y. Nitta and T. Okuyama, *Catal. Lett.*, **2006**, *112*, 27-30.
2. Z.-G. Wang, L. Chen, J. Chen, J.-F. Zheng, W. Gao, Z. Zeng, H. Zhou, X.-K. Zhang, P.-Q. Huang and Y. Su, *Eur. J. Med. Chem.*, **2013**, *62*, 632-648.
3. C. Joyanta, P. Susmita and R. Sujit, *J. Am. Chem. Soc.*, **2005**, *127*, 6162-6163.
4. D. Yang, Y. Long, H. Wang and Z. Zhang, *Org. Lett.*, **2008**, *10*, 4723-4250.
5. F. Tian, D. Yao, Y. Liu, F. Xie and W. Zhang, *Adv. Synth. Catal.*, **2010**, *352*, 1841-1845.
6. a) S. Li, S.-F. Zhu, C.-M. Zhang, S. Song and Q.-L. Zhou, *J. Am. Chem. Soc.*, **2008**, *130*, 8584-8585; b) M. W. Hackl, M. Lakemeyer, M. Dahmen, M. Glaser, A. Pahl, K. Lorenz-Bacith, T. Menzel, S. Sievers, T. Böttcher, I. Antes, H. Waldmann, S.A. Sieber, *J. Am. Chem. Soc.*, **2015**, *137*, 8475-8485; c) T. Sugimura, J. Watanabe, T. Uchida, Y. Nitta, T. Okuyama, *Catal. Lett.*, **2006**, *112*, 27-30.
7. D. Liu, W. Tang, and X. Zhang, *Org. Lett.*, **2004**, *6*, 513-516.
